# Supplementary material for: Chemical and structural studies provide a mechanistic basis for recognition of the MYC G-quadruplex
Source: PubMed Central journal article supplement (PMC6185959; doi:10.1038/s41467-018-06315-w), 2018-10-12
Supplement: 41467_2018_6315_MOESM1_ESM.pdf [file 41467_2018_6315_MOESM1_ESM.pdf]

**Chemical and Structural Studies Provide a Mechanistic Basis for Recognition of  
the MYC G-Quadruplex**

David R. Calabrese<sup>1, †</sup>, Xiang Chen<sup>2, †</sup>, Elena Leon<sup>3, †</sup>, Snehal Gaikwad<sup>3</sup>, Zaw Phyoo<sup>3</sup>, William M. Hewitt<sup>1</sup>, Stephanie Alden<sup>1</sup>, Thomas A. Hilimire<sup>1</sup>, Fahu He<sup>2</sup>, Aleksandra M. Michalowski<sup>3</sup>, John K. Simmons<sup>3</sup>, Lindsey B. Saunders<sup>1</sup>, Shuling Zhang<sup>3</sup>, Daniel Connors<sup>3</sup>, Kylie J. Walters<sup>2, \*</sup>, Beverly A. Mock<sup>3, \*</sup>, and John S. Schneekloth, Jr.<sup>1, \*</sup>

**Supplementary Information**

|  | <b>R<sub>1</sub></b> | <b>R<sub>2</sub></b> | <b>R<sub>3</sub></b> | Protein % | IC <sub>50</sub> | K <sub>D</sub> FI (μM) |
|--|----------------------|----------------------|----------------------|-----------|------------------|------------------------|
|  |                      |                      |                      | 50%       | 7.6 uM           | 23.2 ± 7.6             |
|  |                      |                      |                      | 81%       | 7.2 uM           | >100                   |
|  |                      |                      |                      | 0.4%      | 3.5 uM           | 9.1 ± 1.1              |
|  |                      |                      |                      | 12%       | 3.3 uM           | 23.2 ± 2.5             |
|  |                      |                      |                      | N.D.      | >50 uM           | N.D.                   |
|  |                      |                      |                      | N.D.      | >50 uM           | >80                    |
|  |                      |                      |                      | N.D.      | >50 uM           | >100                   |
|  |                      |                      |                      | 73%       | >10 uM           | 53.4 ± 10.9            |
|  |                      |                      |                      | N.D.      | 26.5 uM          | 57.6 ± 7.4             |
|  |                      |                      |                      | N.D.      | 4.8 uM           | 6.1 ± 2.3              |
|  |                      |                      |                      | N.D.      | 31.2 uM          | 18.8 ± 3.2             |
|  |                      |                      |                      | N.D.      | >50 uM           | N.D.                   |
|  |                      |                      |                      | 32%       | 1.6 uM           | 15.5 ± 8.5             |
|  |                      |                      |                      | N.D.      | 6.8 uM           | 15.1 ± 9.3             |
|  |                      |                      |                      | N.D.      | 4.5 uM           | 17.8 ± 11.5            |
|  |                      |                      |                      | N.D.      | >50 uM           | 36.1 ± 10.9            |
|  |                      |                      |                      | N.D.      | >50 uM           | 30.1 ± 13.5 μM         |
|  |                      |                      |                      | N.D.      | 4.9 uM           | > 35                   |
|  |                      |                      |                      | N.D.      | 6.4 uM           | 24.2                   |
|  |                      |                      |                      | N.D.      | 4.1 uM           | 20.1                   |
|  |                      |                      |                      | N.D.      | 4.6 uM           | > 17.5                 |
|  |                      |                      |                      | N.D.      | 3.9 uM           | 8.9                    |
|  |                      |                      |                      | N.D.      | 9.3 uM           | > 27.5                 |

**Supplementary Table 1: Analogs of DC-34.** Compounds were evaluated as percent of

MYC protein expressed at a 10  $\mu$ M dose (relative to a DMSO control), viability at 48 hours in L363 cells, and  $K_D$  (determined by fluorescence intensity assay).

| Oligo name    | Sequence                                                        | $\Delta T_m$  | Structure     |
|---------------|-----------------------------------------------------------------|---------------|---------------|
| Pu27          | TGG GGA GGG TGG GGA GGG TGG GGA AGG                             | 7.5 $\pm$ 2.0 | Parallel      |
| Pu22          | TGA GGG TGG GGA GGG TGG GGA A                                   | 7.6 $\pm$ 0.5 | Parallel      |
| NMR (121)     | TGA GGG TGG <b>GTA</b> GGG TGG <b>GTA</b> A                     | 6.2 $\pm$ 0.4 | Parallel      |
| 131           | TGA GGG TGG <b>GTA</b> <b>AGG</b> GTG <b>GGT</b> AA             | 4.6 $\pm$ 0.3 | Parallel      |
| 122           | TGA GGG TGG <b>GTA</b> GGG <b>TAG</b> <b>GGT</b> AA             | 7.0 $\pm$ 0.3 | Parallel      |
| 221           | TGA GGG <b>TAG</b> <b>GGT</b> AGG GTG <b>GGT</b> AA             | 4.0 $\pm$ 1.0 | Parallel      |
| 333           | TGA GGG <b>TTA</b> GGG <b>TAA</b> GGG <b>TTA</b> GGG <b>TAA</b> | 0.0 $\pm$ 1.0 | Anti-parallel |
| GAT Tail      | TGA GGG TGG GGA GGG TGG GGA <b>T</b>                            | 4.5 $\pm$ 0.8 | Parallel      |
| no tail       | GGG TGG GGA GGG TGG G                                           | 4.3 $\pm$ 1.7 | Parallel      |
| BCI2          | AGG GGC GGG CGC GGG AGG AAG GGG GCG GGA                         | 4.2 $\pm$ 0.4 | Parallel      |
| HIF1a         | GGG AGG GAG AGG GGG CGG G                                       | 0.2 $\pm$ 1.1 | Parallel      |
| KRAS          | AGG GCG GTG TGG GAA GAG GGA AGA GGG GGA GGC AG                  | 0.7 $\pm$ 0.4 | Parallel      |
| MYB           | GGA GGA GGA GGT CAC GGA GGA GGA GGA GAA GGA GGA GGA GGA         | 1.5 $\pm$ 0.3 | Parallel      |
| Telomeric DNA | TTA GGG TTA GGG TTA GGG TTA GGG TTA                             | 0.3 $\pm$ 0.3 | Anti-parallel |
| VEGF          | CGG GGC GGG CCG GGG GCG GGG T                                   | <2            | Parallel      |
| dsDNA         | CAA TCG GAT CGA ATT CGA TCC GAT TG                              | 0.6 $\pm$ 0.7 | B-DNA         |

**Supplementary Table 2:**  $\Delta T_m$  and structural topology of G4 forming sequences. Assays were performed with DNA oligo (10  $\mu$ M) in the presence of DC-34 (40  $\mu$ M).

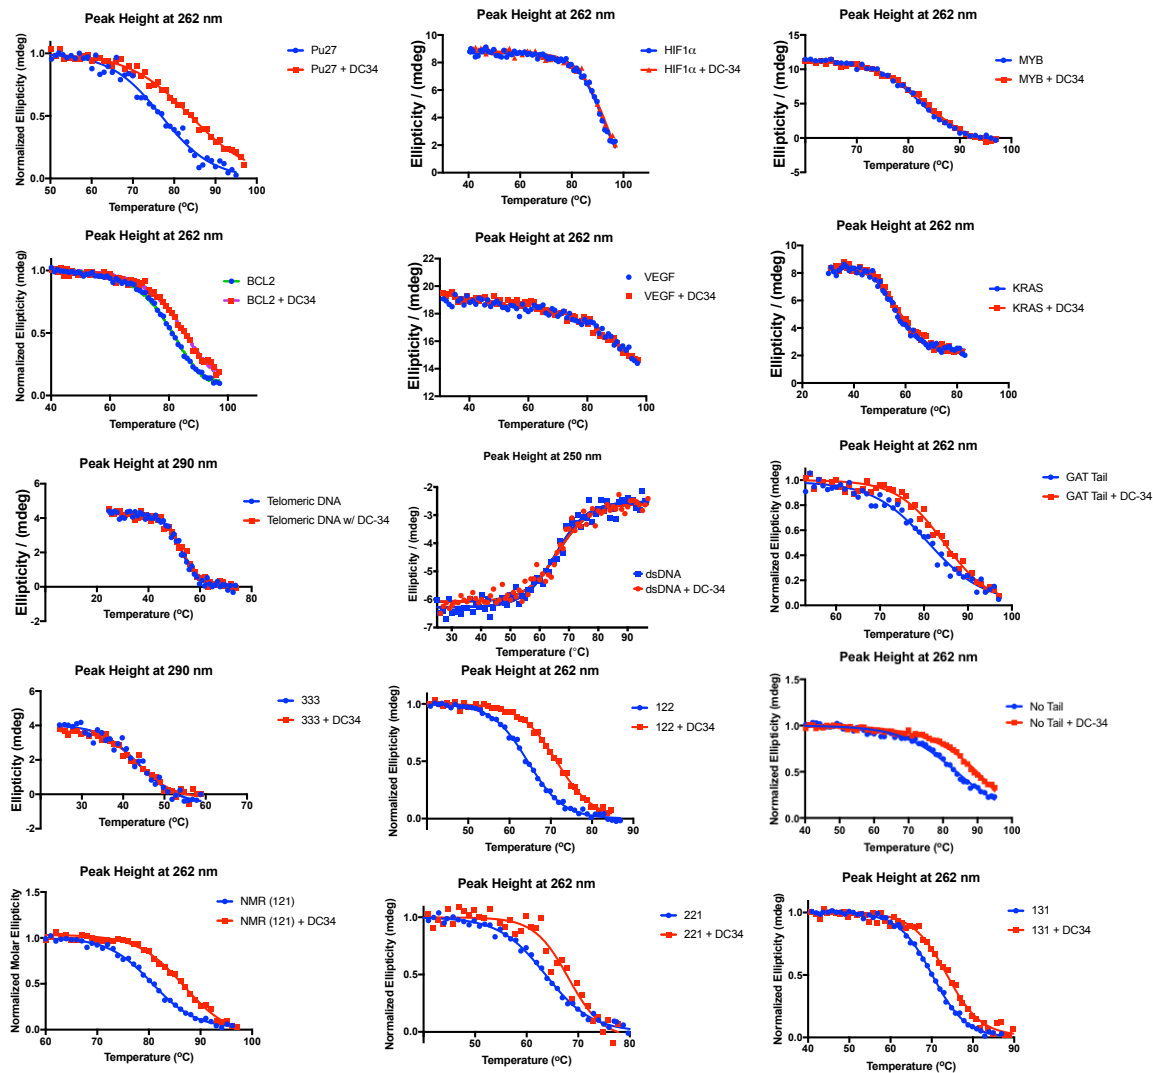

**Supplementary Figure 1:** CD melting temperature curves of the G4s with and without DC-34. Assays were performed with DNA oligo (10  $\mu$ M) in the absence (blue) and presence (red) of compounds (40  $\mu$ M) in triplicate; representative curves are shown.

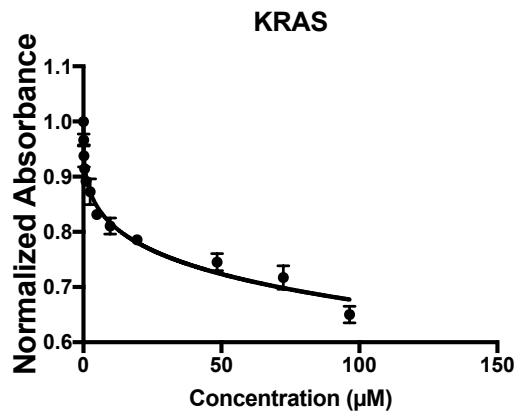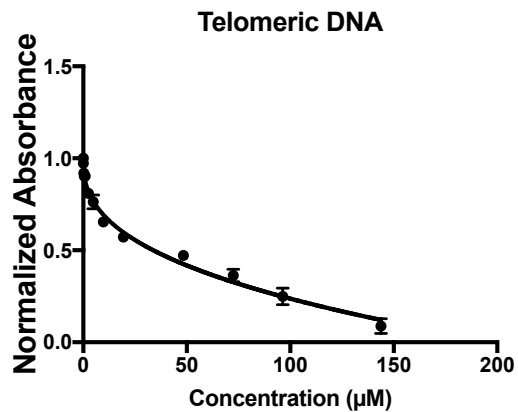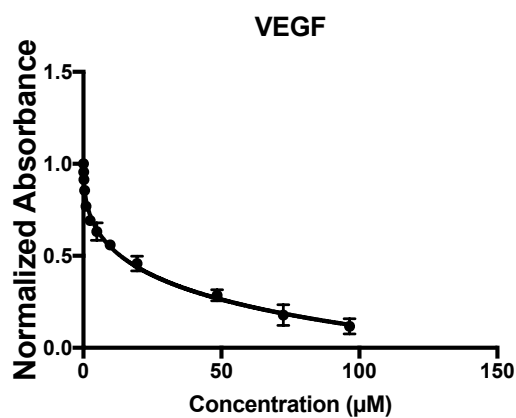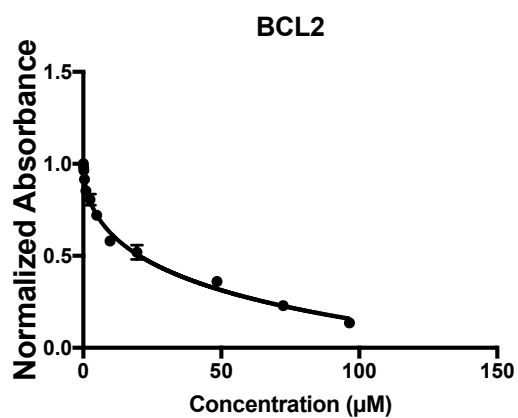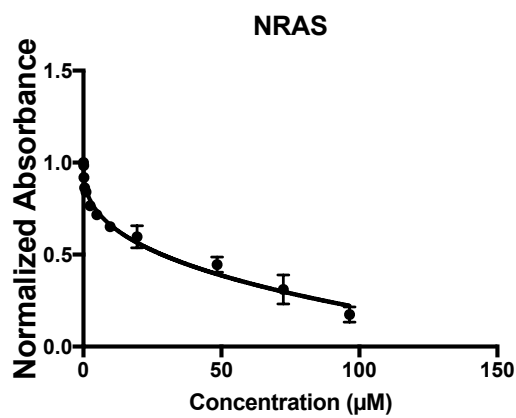

**Supplementary Figure 2:** Fluorescence intensity titration of 5' Alexa Fluor labeled DNA and RNA oligos upon titration of DC-34. Assays were performed in triplicate.

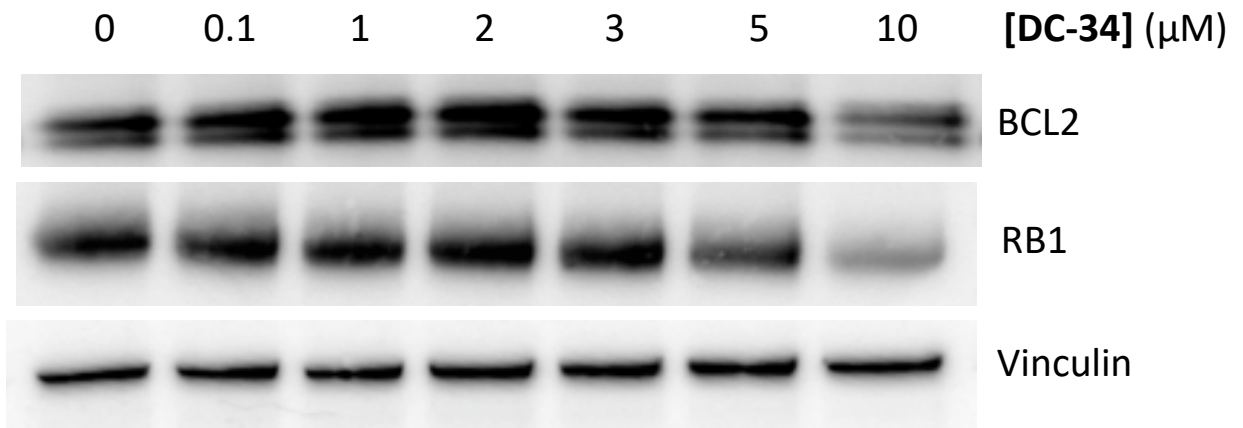

**Supplementary Figure 3:** Rb1 and Bcl2 protein levels expressed in L363 cells at increasing doses of DC-34 (48 hrs post-treatment).

| Cell Line                      | IC <sub>50</sub> (μM) |
|--------------------------------|-----------------------|
| L363                           | 3.44                  |
| KMS12PE                        | 5.33                  |
| JIM1                           | 6.35                  |
| AMO1                           | 5.92                  |
| KMM1                           | 4.13                  |
| KMS27                          | 5.06                  |
| ARD                            | 5.75                  |
| OPM1                           | 6.48                  |
| Karpas417                      | 4.83                  |
| H929                           | 4.89                  |
| CA46 (Burkitt's lymphoma)      | 9.20                  |
| CMV-MYC Transfected 293T cells | 34.00                 |
| Human Fibroblast 1634          | 19.55                 |

**Supplementary Table 3:** The half maximal inhibitory concentration (IC<sub>50</sub>) (cytotoxicity) of DC-34 against a panel of multiple myeloma cell lines, and the human fibroblast 1634 cell line. Two cell lines, CA46 Burkitt's lymphoma cell line and CMV-MYC transfected 293T cells, where MYC levels are under the control of IGH and CMV promoters, respectively, were more resistant to DC-34 cytotoxicity.

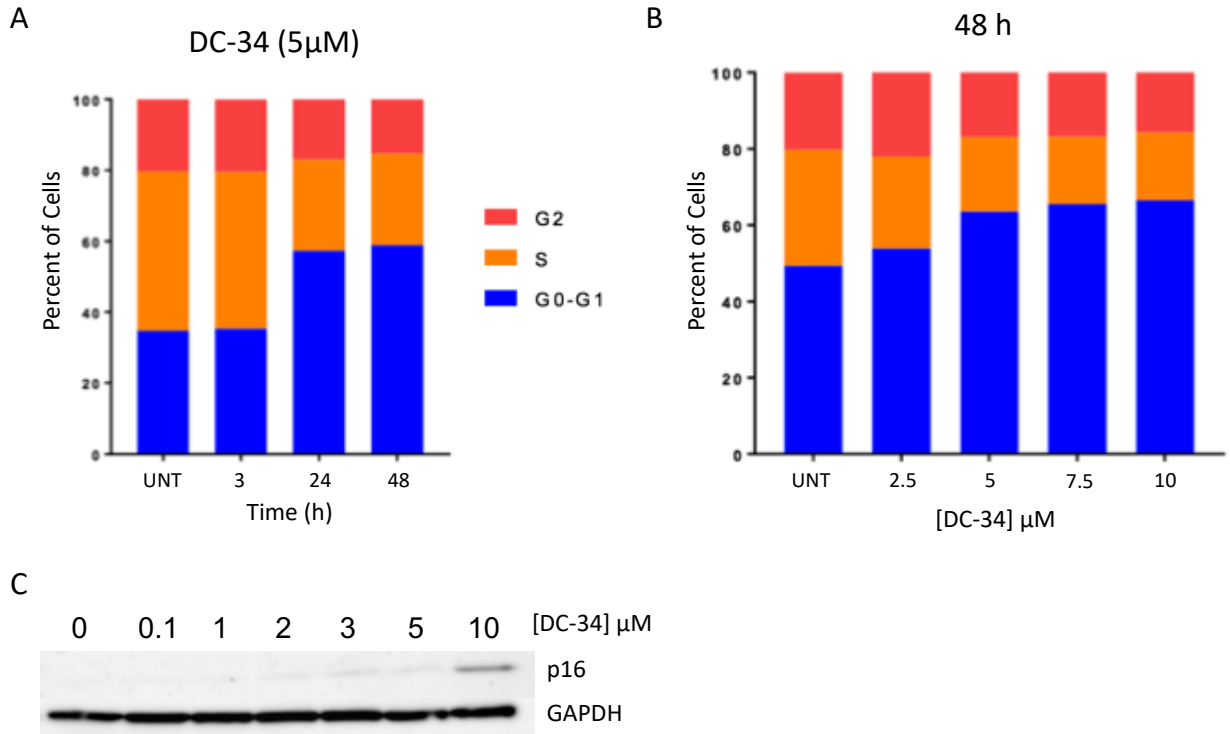

**Supplementary Figure 4:** Cell cycle analyses of untreated and DC-34 treated L363 cells (gated on live cells): A) Time course of percent of cells in G0, G1 and G2 after 5 $\mu$ M DC-34, B) Percent of cells in G0, G1 and G2 after 48 hours in response to increasing concentrations of DC-34. C) Western blot of increasing p16 protein in response to increasing concentrations of DC-34.



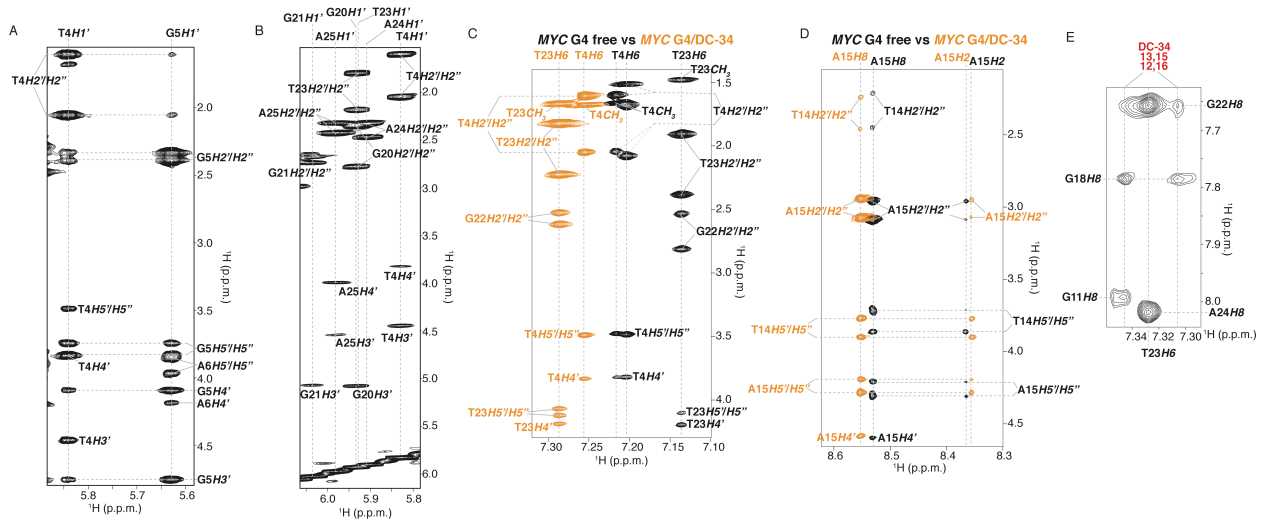

**Supplementary Figure 5.** NOESY spectra indicate chemical shift changes caused by DC-34 binding and intermolecular NOEs. (A,B) Example regions of 2D homonuclear NOESY (A) and TOCSY (B) spectra that were used to assign the ribose protons of MYC G4 with DC-34 bound. (C, D) Overlaid regions of 2D NOESY experiments acquired on free (black) and DC-34-bound (orange) MYC G4 highlighting chemical shift changes in the (C) G-tetrad (G22) and flanking (T4 and T23) region or (D) loop (T14 and A15) region. (E) A 2D NOESY experiment indicates intermolecular NOEs between the DC-34 trifluoromethylbenzene group and G18, G22, and G11 H8.

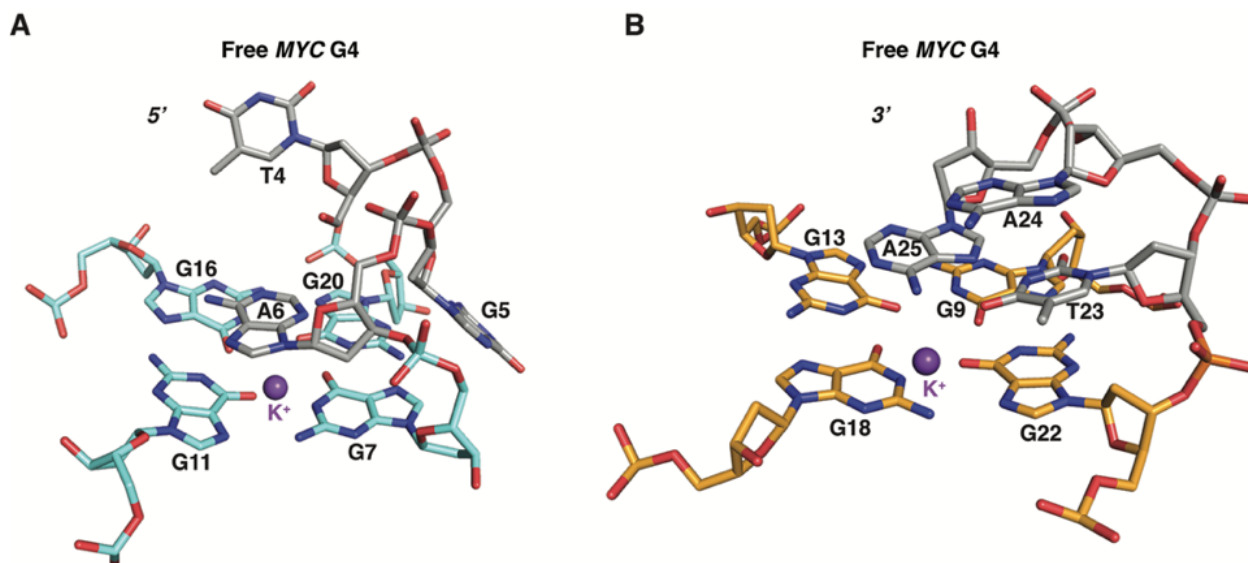

**Supplementary Figure 6:** Expanded views of the free MYC G4 structure at the 5' (A) or 3' (B) end. The color scheme follows Figure 8.

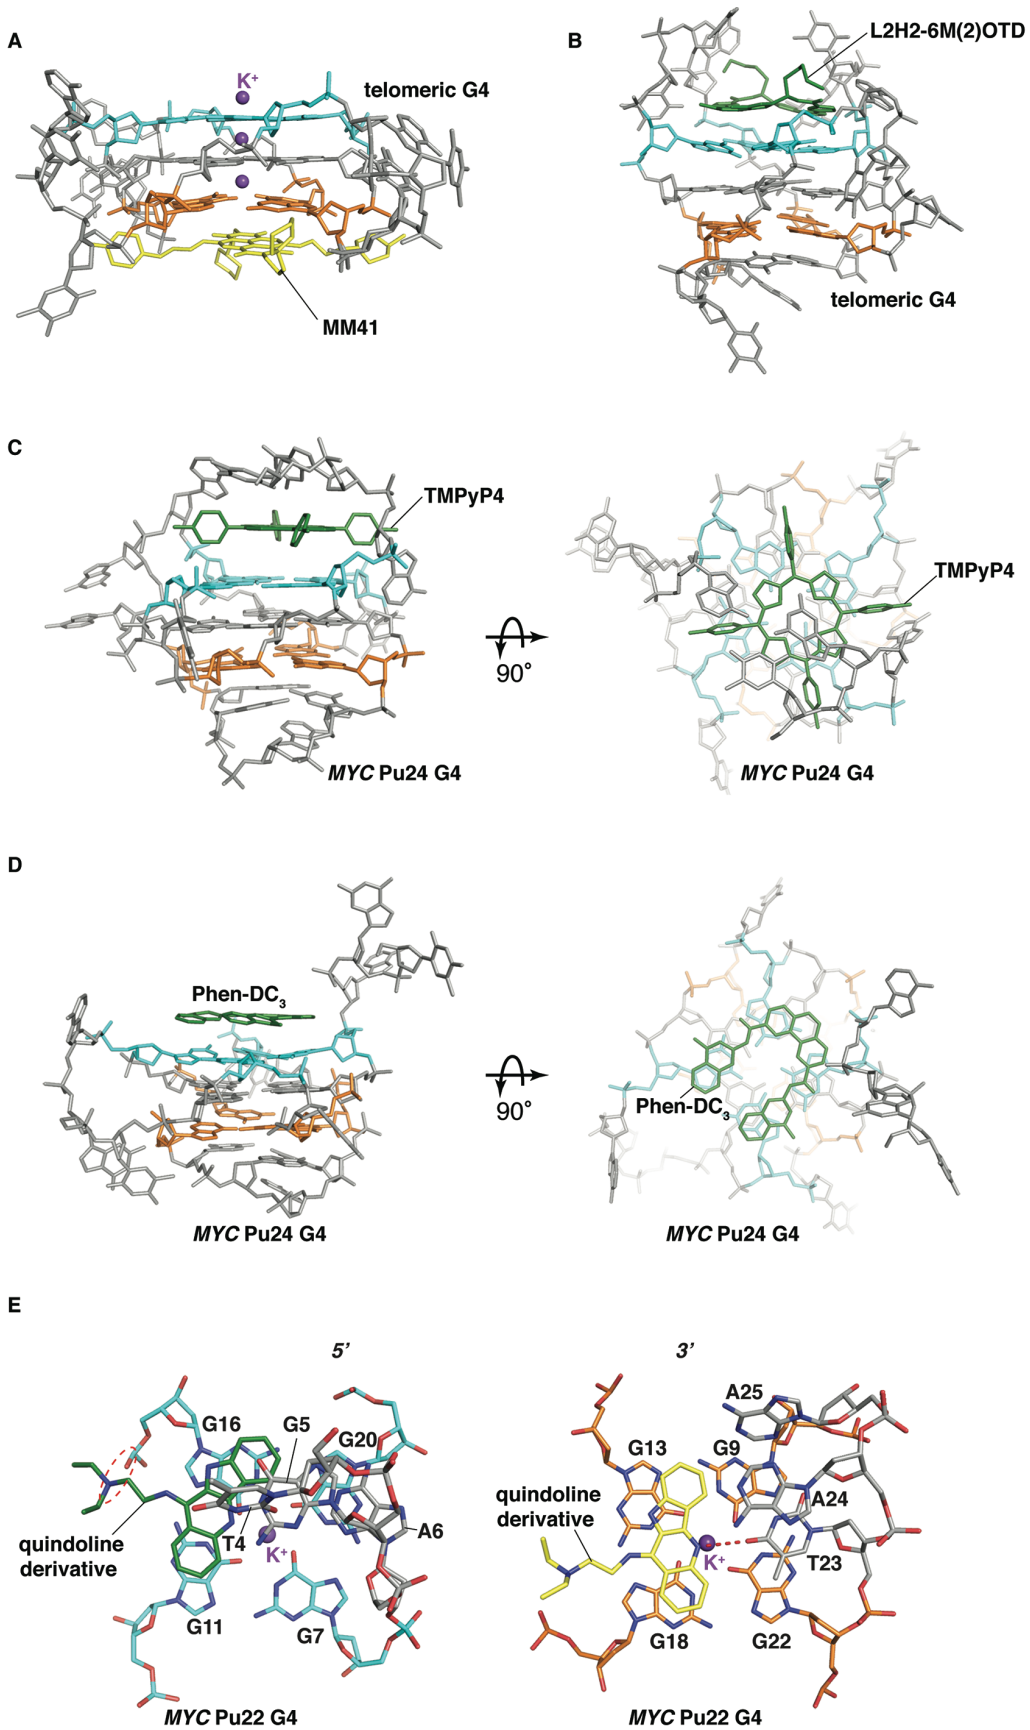

**Supplementary Figure 7. Comparison of different G4/ligand complexes. (A-D)** Structures of telomeric G4/MM41 (**A**, PDB 3UYH), telomeric G4/L2H2-6M(2)OTD (**B**, PDB 2MB3), MYC Pu24 G4/TMPyP4 (**C**, PDB 2A5R), and MYC Pu24 G4/Phen-DC<sub>3</sub> (**D**, PDB 2MGN) are displayed with the color scheme from Figure 8. In **C** and **D**, the structures are displayed with a side (left panel) and top (right panel) view relative to the cylindrical axis of the DNA. (**E**) Expanded views of the MYC Pu22 G4/quindoline derivative complex to display interactions at the 5' (left) and 3' (right) ends of the MYC G4. A hydrogen bond between T23 O<sub>4</sub> of MYC G4 and N1 of quindoline derivative is indicated by a dashed red line; a dashed circle highlights a potential electrostatic interaction involving the G16 phosphate group of MYC G4 and the aminoalkylamino side chain of quindoline derivative. Potassium ions are displayed as purple spheres in (**A**) and (**E**), but missing from the PDB coordinate files for (B-D).

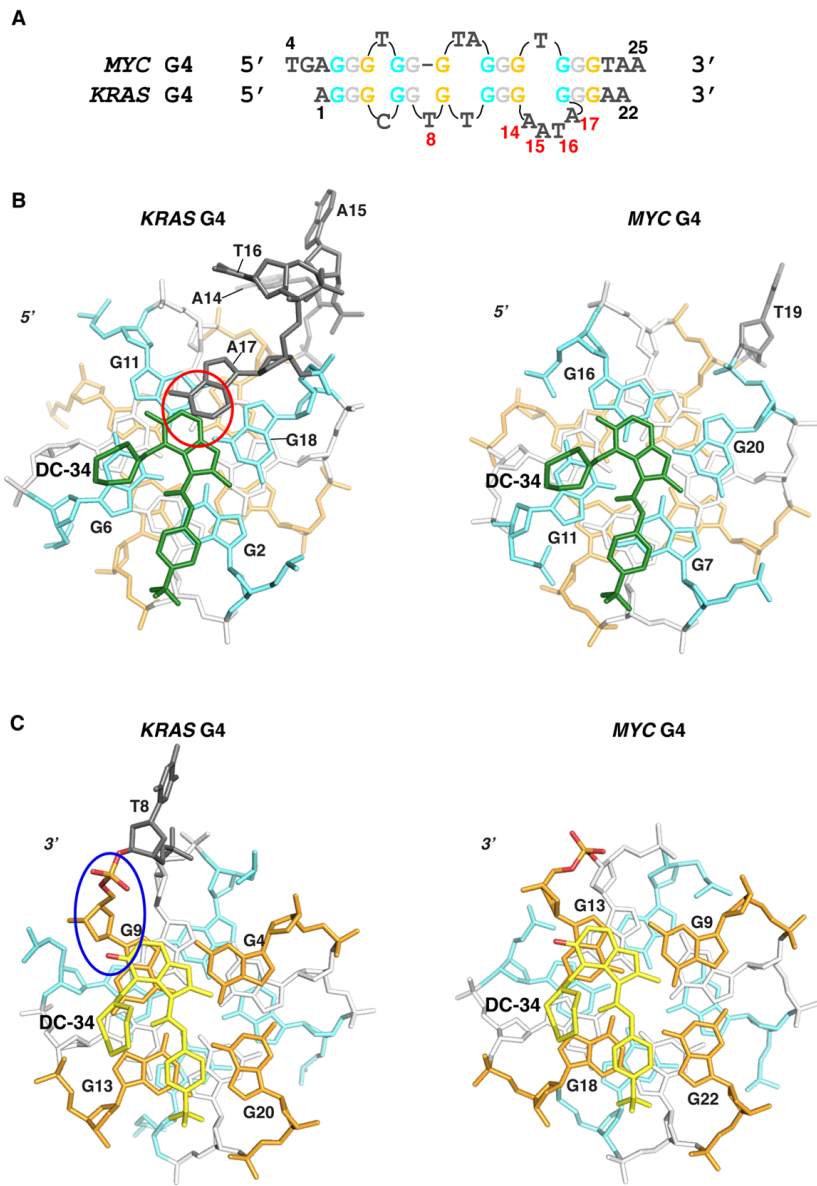

**Supplementary Figure 8:** Model structure of the *KRAS* G4 with DC-34. (A) Sequence alignment of the *MYC* and *KRAS* G4 region (for sequence used in PDB 5I2V). Loop residues that impact DC-34 binding in the model *KRAS*/DC-34 structure are labeled in red. (B, C) Expanded views of the *KRAS* G4/DC-34 model structure at the 5' (B) or 3' (C) end. Regions with steric clashes or electric repulsions between DC-34 and the *KRAS* G4 are highlighted by red or blue circles respectively. Comparative views of *MYC* G4/DC-34 are provided to the left. Residues from the 5', middle, or 3' G-tetrad are highlighted in blue, white, or orange, respectively. Residues in loops are highlighted in dark gray. The two DC-34 molecules are colored green and yellow and for simplicity, the two potassium ions are not shown.

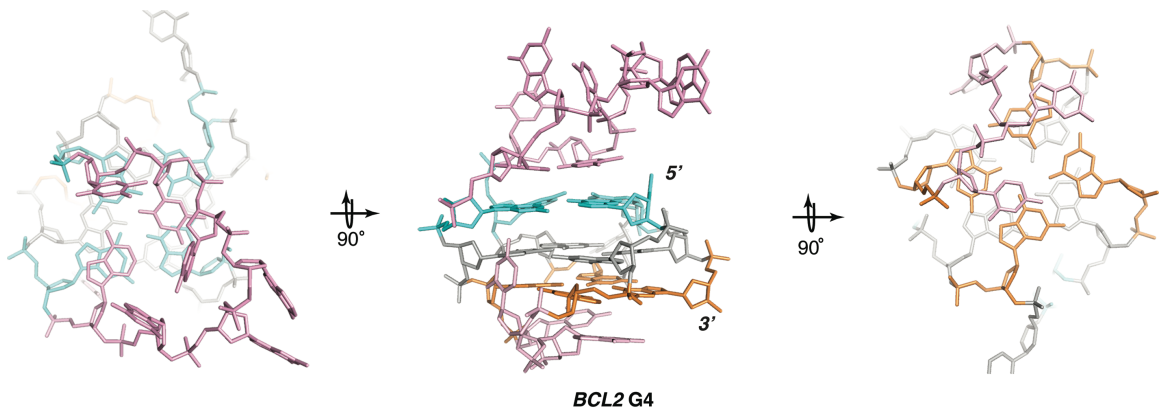

**Supplementary Figure 9:** The *BCL2* G4 structure is displayed with a top (left panel), side (middle panel) and bottom (right panel) view relative to the cylindrical axis of the DNA. The color scheme follows Figure 7 with the two lateral loops at 5' or 3' face in pink.

## Oligos used

### Fluorescence Titration

**Alexafluor647-MYC (pu27):** 5' -Alexafluor647 TGG GGA GGG TGG GGA GGG TGG GGA AGG

**Alexafluor647-NRAS:** 5' -Alexafluor647 UGU GGG AGG GGC GGG UCU GGG

**Alexafluor647-KRAS:** 5' -Alexafluor647 AGG GCG GTG TGG GAA GAG GGA AGA GGG GGA GGC AG

**Alexafluor647-BCL2:** 5' -Alexafluor647 AGG GGC GGG CGC GGG AGG AAG GGG GCG GGA

**Alexafluor647-Telomeric DNA:** 5' -Alexafluor647 TTA GGG TTA GGG TTA GGG TTA GGG TTA

**Alexafluor647-VEGF:** 5' -Alexafluor647 CGG GGC GGG CCG GGG GCG GGG T

### NMR

**NMR-MYC:** 5' - TGA GGG TGG GTA GGG TGG GTA A

### SPR

**Biotin MYC (pu27):** 5' – BiotinTEG TGG GGA GGG TGG GGA GGG TGG GGA AGG

### Thermal Melt

**BCI2:** 5' - AGG GGC GGG CGC GGG AGG AAG GGG GCG GGA

**MYC (pu22):** 5' - TGA GGG TGG GGA GGG TGG GGA A

**MYC 121 (NMR):** 5' - TGA GGG TGG GTA GGG TGG GTA A

**221:** 5' - TGA GGG TAG GGT AGG GTG GGT AA

**131:** 5' - TGA GGG TGG GTA AGG GTG GGT AA

**122:** 5' - TGA GGG TGG GTA GGG TAG GGT AA

**333:** 5' - TGA GGG TTA GGG TAA GGG TTA GGG TAA

**GAT Tail:** 5' - TGA GGG TGG GGA GGG TGG GGA T

**No Tails:** 5' - GGG TGG GGA GGG TGG G

**MYC (pu27):** 5' - TGG GGA GGG TGG GGA GGG TGG GGA AGG

**MYB:** 5' - GGA GGA GGA GGT CAC GGA GGA GGA GGA GAA GGA GGA GGA GGA

**VEGF:** 5' - CGG GGC GGG CCG GGG GCG GGG T

**KRAS:** 5' - AGG GCG GTG TGG GAA GAG GGA AGA GGG GGA GGC AG

**HIF1a:** 5' - GGG AGG GAG AGG GGG CGG G

**Telomeric DNA:** 5' – TTA GGG TTA GGG TTA GGG TTA GGG TTA

**dsDNA:** 5' - CAA TCG GAT CGA ATT CGA TCC GAT TG

### QPCR

**MYC (forward):** TGAGGAGACACCGCCCAC

**MYC (reverse):** CAACATCGATTTCTTCCTCATCTTC

**BCL2 (forward):** GGTGGGGTCATGTGTGTGG

**BCL2 (reverse):** CGGTTTCAGGTACTCAGTCATCC

**VEGFA (forward):** GGAGGAGGGCAGAATCATCA

**VEGFA (reverse):** CTTGGTGAGGTTTGATCCGC

**KRAS (forward):** GGACTGGGGAGGGCTTTCT

**KRAS (reverse):** GCCTGTTTTGTGTCTACTGTTCT

**RB1 (forward):** TCACATTCCTCGAAGCCCTT

**RB1 (reverse):** ACGGTCGCTGTTACATACCA

## Synthetic Procedures and Compound Characterization

**General Remarks:** Flash column chromatography was performed using a Teledyne ISCO CombiFlash Rf automated chromatography system. HPLC purifications were performed on a Waters HPLC with a 2545 model pump and a Phenomenex Luna 10 micron C18 column (75 x 30 mm), using an acetonitrile/water gradient with 0.1% TFA. Proton ( $^1\text{H}$  NMR) and carbon ( $^{13}\text{C}$  NMR) magnetic resonance spectra were obtained in the specified deuterated solvent at 400 MHz or 500 MHz and 101 MHz or 126 MHz, respectively. The following abbreviations were utilized to describe peak patterns: br = broad, s = singlet, d = doublet, t = triplet, q = quartet, app = apparent, and m = multiplet. Unless otherwise noted, all chemicals were obtained from Sigma Aldrich and used without further purification. Toluene, acetonitrile, dimethylformamide, and dichloromethane were obtained from GlassContour Solvent Systems and were dried over alumina under an argon atmosphere.

**HRMS.** High resolution mass spectrometry data were acquired on an Agilent 6520 Accurate-Mass Q-TOF LC/MS System, (Agilent Technologies, Inc.) equipped with a dual electro-spray source, operated in the positive-ion mode. Separation was performed on a Zorbax 300SB-C18 Poroshell column (2.1 mm x 150 mm; particle size 5 mm). The analytes were eluted using a water/acetonitrile gradient with 0.1% formic acid. Data were acquired at high resolution (1,700  $m/z$ ), 4 GHz. To maintain mass accuracy during the run time, an internal mass calibration sample was infused continuously during the LC/MS runs. Data acquisition and analysis were performed using MassHunter Workstation Data Software, LCMS Data Acquisition (version B.06.01) and Qualitative Analysis (version B.07.00).

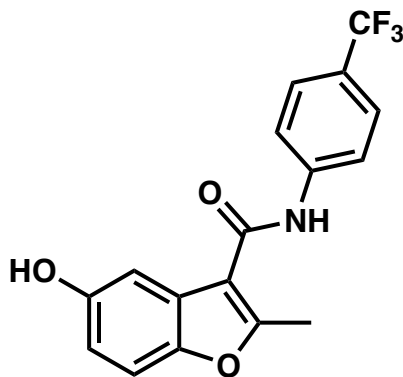

**5-hydroxy-2-methyl-N-(4-(trifluoromethyl)phenyl)benzofuran-3-carboxamide. (1)** To a solution of acetonitrile (10 mL), 3-oxo-N-(4-(trifluoromethyl)phenyl)butanamide (350 mg, 1.43 mmol, 1 eq), p-benzoquinone (154 mg, 1.43 mmol, 1 eq), and  $\text{In}(\text{OTf})_3$  (40 mg, 71  $\mu\text{mol}$ , 5 mol %) was added. The solution was stirred at room temperature for 16 h. The solvent was removed under reduced pressure. The residue was purified by chromatography on silica gel to afford the desired product (236 mg, 49%). A small amount of HPLC purified product was used for analytical characterization.  $^1\text{H}$  NMR (500 MHz,  $\text{DMSO-}d_6$ )  $\delta$  10.38 (s, 1H), 9.32 (s, 1H), 7.94 (d,  $J = 8.5$  Hz, 2H), 7.73 (d,  $J = 8.5$  Hz, 2H), 7.39 (d,  $J = 8.9$  Hz, 1H), 7.05 (d,  $J = 2.5$  Hz, 1H), 6.75 (dd,  $J = 8.8, 2.5$  Hz, 1H), 2.62 (s, 3H).  $^{13}\text{C}$  NMR (126 MHz,  $\text{DMSO-}d_6$ )  $\delta$  162.45, 158.75, 153.81, 146.99, 142.71, 126.66, 126.01 (q,  $J = 3.8$  Hz), 124.41 (q,  $J = 270.9$  Hz), 123.52 (q,  $J = 31.9$  Hz), 119.80, 113.13, 112.85, 111.25, 105.15, 13.83. HRMS for  $\text{C}_{17}\text{H}_{12}\text{F}_3\text{NO}_3$   $[\text{M}+\text{H}]^+$  Calc: 336.08420, found: 336.08470 (error = -1.22 ppm).



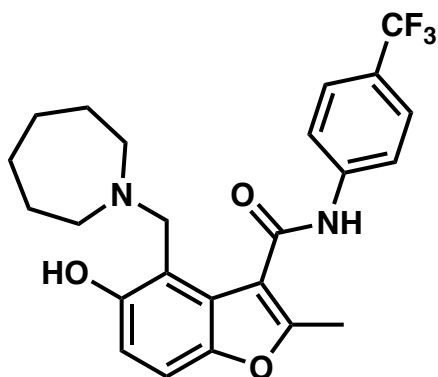

**4-(azepan-1-ylmethyl)-5-hydroxy-2-methyl-N-(4-(trifluoromethyl)phenyl)benzofuran-3-carboxamide. (DC-34)** A solution of 5-hydroxy-2-methyl-N-(4-(trifluoromethyl)phenyl)benzofuran-3-carboxamide (215 mg, 0.642 mmol, 1 eq), 37% aq. formaldehyde (104  $\mu$ L, 1.28 mmol, 2 eq), and azepane (144  $\mu$ L, 1.28 mmol, 2 eq) in EtOH (3 mL) was heated to 70  $^{\circ}$ C for 6 h. After the reaction was cooled to room temperature, the solvent was removed under reduced pressure. The residue was purified by chromatography on silica gel to afford the desired product (66%, 188 mg). A small amount of HPLC purified product was used for analytical characterization as the trifluoroacetic acid salt.  $^1\text{H}$  NMR (500 MHz, DMSO- $d_6$ )  $\delta$  10.99 (s, 1H), 10.36 (s, 1H), 8.92 (s, 1H), 7.96 (d,  $J$  = 8.5 Hz, 2H), 7.80 (d,  $J$  = 8.6 Hz, 2H), 7.59 (d,  $J$  = 8.9 Hz, 1H), 7.00 (d,  $J$  = 8.9 Hz, 1H), 4.47 (d,  $J$  = 5.5 Hz, 2H), 3.35 – 3.27 (m, 2H), 3.25 – 3.13 (m, 2H), 2.62 (s, 3H), 1.83 (dt,  $J$  = 14.7, 7.1 Hz, 2H), 1.77 – 1.67 (m, 2H), 1.65 – 1.46 (m, 4H).  $^{13}\text{C}$  NMR (126 MHz, DMSO- $d_6$ )  $\delta$  164.08, 158.34, 157.72 (q,  $J$  = 30.9 Hz), 153.75, 147.16, 142.09, 126.64, 126.25 (q,  $J$  = 3.7 Hz), 124.35 (q,  $J$  = 32.1 Hz), 124.28 (q,  $J$  = 271.6 Hz), 120.06, 117.21 (q,  $J$  = 300.3 Hz), 113.86, 113.55, 112.96, 107.31, 53.73, 51.54, 26.65, 22.47, 14.10. HRMS for  $\text{C}_{24}\text{H}_{25}\text{F}_3\text{N}_2\text{O}_3$   $[\text{M}+\text{H}]^+$  calc: 447.18900, found: 447.19002 (error = -2.11 ppm).

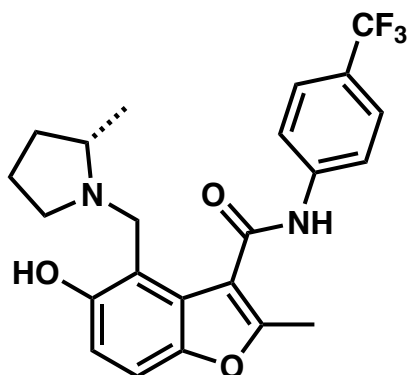

**(S)-5-hydroxy-2-methyl-4-((2-methylpyrrolidin-1-yl)methyl)-N-(4-(trifluoromethyl)phenyl)benzofuran-3-carboxamide. (2)** A solution of 5-hydroxy-2-methyl-N-(4-(trifluoromethyl)phenyl)benzofuran-3-carboxamide (46 mg, 0.14 mmol, 1 eq), 37% aq. formaldehyde (22  $\mu$ L, 0.28 mmol, 2 eq), and amine (26  $\mu$ L, 0.28 mmol, 2 eq) in EtOH (2 mL) was heated to 70  $^{\circ}$ C for 6 h. After the reaction was cooled to room temperature, the solvent was removed under reduced pressure. The residue was purified by chromatography on silica gel to afford the desired product (77%, 46 mg). A small amount of HPLC purified product was used for analytical characterization as the trifluoroacetic acid salt.  $^1\text{H}$  NMR (400 MHz, DMSO- $d_6$ )  $\delta$  10.95 (s, 1H), 10.45 (s, 1H), 8.83 (s, 1H), 7.96 (d,  $J$  = 8.4 Hz, 2H), 7.78 (d,  $J$  = 8.5 Hz, 2H), 7.58 (d,  $J$  = 8.9 Hz, 1H),

7.02 (d,  $J = 8.9$  Hz, 1H), 4.63 (dd,  $J = 13.2, 3.9$  Hz, 1H), 4.43 (dd,  $J = 13.1, 7.3$  Hz, 1H), 3.58 (dq,  $J = 8.7, 6.6$  Hz, 1H), 3.26 (ddt,  $J = 25.6, 11.3, 6.7$  Hz, 2H), 2.61 (s, 3H), 2.26 – 2.11 (m, 1H), 1.95 – 1.81 (m, 2H), 1.60 (dq,  $J = 12.8, 8.5$  Hz, 1H), 1.30 (d,  $J = 6.5$  Hz, 3H).  $^{13}\text{C}$  NMR (101 MHz, DMSO- $d_6$ )  $\delta$  163.77, 158.23, 158.10 (q,  $J = 33.8$  Hz), 153.57, 147.16, 142.14, 126.54, 126.19 (q,  $J = 3.9$  Hz), 124.30 (q,  $J = 271.4$  Hz), 124.27 (q,  $J = 32.1$  Hz), 120.05, 116.42 (q,  $J = 296.3$  Hz), 113.84, 113.33, 112.85, 107.83, 64.13, 53.17, 48.39, 31.12, 21.27, 16.40, 14.00. HRMS for  $\text{C}_{23}\text{H}_{23}\text{F}_3\text{N}_2\text{O}_3$   $[\text{M}+\text{H}]^+$  calc: 433.17335, found: 433.17419 (error = -1.65 ppm).

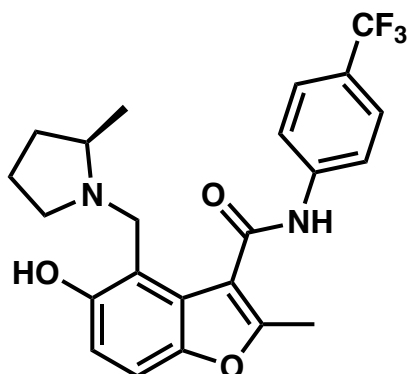

**(R)-5-hydroxy-2-methyl-4-((2-methylpyrrolidin-1-yl)methyl)-N-(4-(trifluoromethyl)phenyl)benzofuran-3-carboxamide. (3)** A solution of 5-hydroxy-2-methyl-N-(4-(trifluoromethyl)phenyl)benzofuran-3-carboxamide (24 mg, 72  $\mu\text{mol}$ , 1 eq), 37% aq. formaldehyde (12  $\mu\text{L}$ , 143  $\mu\text{mol}$ , 2 eq), and amine (14  $\mu\text{L}$ , 143  $\mu\text{mol}$ , 2 eq) in EtOH (1 mL) was heated to 70  $^\circ\text{C}$  for 6 h. After the reaction was cooled to room temperature, the solvent was removed under reduced pressure. The residue was purified by chromatography on silica gel to afford the desired product (49%, 15 mg). A small amount of HPLC purified product was used for analytical characterization as the trifluoroacetic acid salt.  $^1\text{H}$  NMR (400 MHz, DMSO- $d_6$ )  $\delta$  10.79 (s, 1H), 7.95 (d,  $J = 8.4$  Hz, 2H), 7.73 (d,  $J = 8.6$  Hz, 2H), 7.30 (d,  $J = 8.8$  Hz, 1H), 6.72 (d,  $J = 8.7$  Hz, 1H), 4.11 (d,  $J = 13.9$  Hz, 1H), 3.69 (d,  $J = 13.9$  Hz, 1H), 2.77 (dt,  $J = 9.6, 5.8$  Hz, 1H), 2.48 (s, 3H), 2.39 (q,  $J = 6.9$  Hz, 1H), 2.18 (q,  $J = 8.7$  Hz, 1H), 1.93 – 1.80 (m, 1H), 1.61 – 1.49 (m, 2H), 1.34 – 1.21 (m, 1H), 0.97 (d,  $J = 6.1$  Hz, 3H).  $^{13}\text{C}$  NMR (126 MHz, DMSO- $d_6$ )  $\delta$  163.77, 158.27, 157.95 (q,  $J = 32.9$  Hz), 153.53, 147.17, 142.12, 126.55, 126.23 (q,  $J = 3.7$  Hz), 124.30 (q,  $J = 271.4$  Hz), 124.29 (q,  $J = 31.9$  Hz), 120.06, 113.84, 113.37, 112.83, 107.85, 64.17, 53.18, 48.42, 31.14, 21.28, 16.43, 14.04. HRMS for  $\text{C}_{23}\text{H}_{23}\text{F}_3\text{N}_2\text{O}_3$   $[\text{M}+\text{H}]^+$  calc: 433.17335, found: 433.17567 (error = -5.20 ppm).

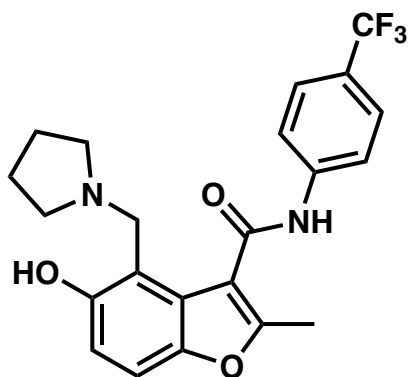

**5-hydroxy-2-methyl-4-(pyrrolidin-1-ylmethyl)-N-(4-**

**(trifluoromethyl)phenyl)benzofuran-3-carboxamide. (4)** A solution of 5-hydroxy-2-methyl-N-(4-(trifluoromethyl)phenyl)benzofuran-3-carboxamide (32 mg, 88.2  $\mu\text{mol}$ , 1 eq), 37% aq. formaldehyde ( $\mu\text{L}$ , 0.176 mmol, 2 eq), and amine ( $\mu\text{L}$ , 0.176 mmol, 2 eq) in EtOH (2 mL) was heated to 70  $^{\circ}\text{C}$  for 6 h. After the reaction was cooled to room temperature, the solvent was removed under reduced pressure. The residue was purified by chromatography on silica gel to afford the desired product (81%, 30 mg). A small amount of HPLC purified product was used for analytical characterization as the trifluoroacetic acid salt.  $^1\text{H}$  NMR (500 MHz,  $\text{DMSO-}d_6$ )  $\delta$  10.90 (s, 1H), 10.29 (s, 1H), 9.17 (d,  $J = 6.9$  Hz, 1H), 7.97 (d,  $J = 8.5$  Hz, 2H), 7.79 (d,  $J = 8.6$  Hz, 2H), 7.57 (d,  $J = 8.9$  Hz, 1H), 6.99 (d,  $J = 8.9$  Hz, 1H), 4.47 (d,  $J = 5.5$  Hz, 2H), 3.45 (m, 2H), 3.29 – 3.15 (m, 2H), 2.62 (s, 3H), 2.08 – 1.97 (m, 2H), 1.90 (dt,  $J = 8.8, 4.2$  Hz, 2H).  $^{13}\text{C}$  NMR (126 MHz,  $\text{DMSO-}d_6$ )  $\delta$  163.82, 158.20, 157.94 (q,  $J = 33.1$  Hz), 153.34, 147.13, 142.21, 126.69, 126.25 (q,  $J = 4.1$  Hz), 124.32, 124.25 (q,  $J = 31.7$  Hz), 120.04, 116.66 (q,  $J = 296.4$  Hz), 113.93, 113.32, 113.00, 108.06, 53.75, 49.52, 22.59, 14.12. HRMS for  $\text{C}_{22}\text{H}_{21}\text{F}_3\text{N}_2\text{O}_3$   $[\text{M}+\text{H}]^+$  calc: 419.5770, found: 419.15814 (error = -0.76 ppm).

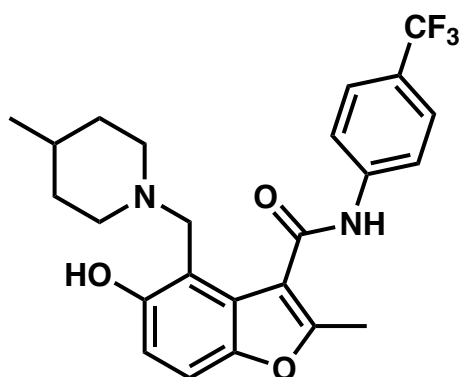

**5-hydroxy-2-methyl-4-((4-methylpiperidin-1-yl)methyl)-N-(4-**

**(trifluoromethyl)phenyl)benzofuran-3-carboxamide. (5)** A solution of 5-hydroxy-2-methyl-N-(4-(trifluoromethyl)phenyl)benzofuran-3-carboxamide (60 mg, 0.179 mmol, 1 eq), 37% aq. formaldehyde (29  $\mu\text{L}$ , 0.358 mmol, 2 eq), and amine (42  $\mu\text{L}$ , 0.358 mmol, 2 eq) in EtOH (2 mL) was heated to 70  $^{\circ}\text{C}$  for 6 h. After the reaction was cooled to room temperature, the solvent was removed under reduced pressure. The residue was purified by chromatography on silica gel to afford the desired product (79%, 63 mg). A small amount of HPLC purified product was used for analytical characterization as the trifluoroacetic acid salt.  $^1\text{H}$  NMR (400 MHz,  $\text{DMSO-}d_6$ )  $\delta$  10.69 (s, 1H), 7.96 (d,  $J = 8.4$  Hz, 2H), 7.72 (d,  $J = 8.5$  Hz, 2H), 7.28 (d,  $J = 8.8$  Hz, 1H), 6.74 (d,  $J = 8.8$  Hz, 1H), 3.70 (s, 2H), 2.65 (d,  $J = 10.9$  Hz, 2H), 2.48 (s, 4H), 1.83 (td,  $J = 11.8, 2.4$  Hz, 2H), 1.46 – 1.32 (m, 2H), 1.24 (m, 1H), 0.88 (qd,  $J = 12.0, 3.8$  Hz, 2H), 0.73 (d,  $J = 6.5$  Hz, 3H).  $^{13}\text{C}$  NMR (126 MHz,  $\text{DMSO-}d_6$ )  $\delta$  163.34, 155.16, 152.98, 147.13, 143.01, 126.07 (q,  $J = 3.8$  Hz), 125.67, 124.43 (q,  $J = 271.4$  Hz), 123.36 (q,  $J = 31.8$  Hz), 119.08, 115.24, 114.27, 112.88, 109.69, 53.97, 52.55, 33.51, 30.01, 21.64, 13.32. HRMS for  $\text{C}_{24}\text{H}_{25}\text{F}_3\text{N}_2\text{O}_3$   $[\text{M}+\text{H}]^+$  calc: 447.18900, found: 447.19005 (error = -2.05 ppm).

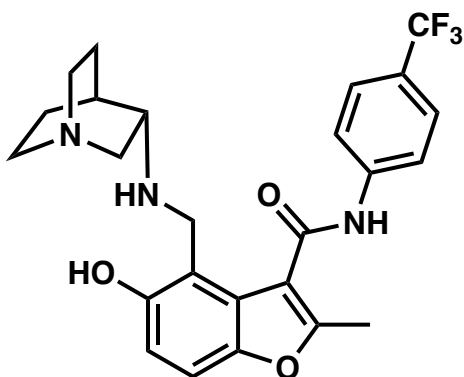

**5-hydroxy-2-methyl-4-(((1*R*,3*S*,4*R*)-quinuclidin-3-yl)amino)methyl)-*N*-(4-(trifluoromethyl)phenyl)benzofuran-3-carboxamide. (6)** A solution of 5-hydroxy-2-methyl-*N*-(4-(trifluoromethyl)phenyl)benzofuran-3-carboxamide (60 mg, 0.18 mmol, 1 eq), 37% aq. formaldehyde (29  $\mu$ L, 0.36 mmol, 2 eq), triethyl amine (75  $\mu$ L, 0.54 mmol, 3 eq), and amine (71  $\mu$ L, 0.36 mmol, 2 eq) in EtOH (2 mL) was heated to 70  $^{\circ}$ C for 6 h. After the reaction was cooled to room temperature, the solvent was removed under reduced pressure. The residue was purified by chromatography on silica gel to afford the desired product. (48%, 41 mg). A small amount of HPLC purified product was used for analytical characterization as the trifluoroacetic acid salt.  $^1\text{H}$  NMR (500 MHz, DMSO- $d_6$ )  $\delta$  10.91 (s, 1H), 10.43 (s, 1H), 9.13 (s, 1H), 8.85 (s, 1H), 7.97 (d,  $J$  = 8.5 Hz, 2H), 7.78 (d,  $J$  = 8.5 Hz, 2H), 7.56 (d,  $J$  = 8.9 Hz, 1H), 7.02 (d,  $J$  = 8.9 Hz, 1H), 4.48 – 4.28 (m, 2H), 3.75 (s, 1H), 3.72 – 3.63 (m, 1H), 3.28 (tt,  $J$  = 11.6, 5.9 Hz, 4H), 3.22 – 3.13 (m, 1H), 2.64 (s, 3H), 2.54 (q,  $J$  = 3.1 Hz, 1H), 2.18 (dt,  $J$  = 10.0, 7.0, 3.2 Hz, 1H), 2.00 – 1.87 (m, 1H), 1.87 – 1.71 (m, 1H).  $^{13}\text{C}$  NMR (126 MHz, DMSO- $d_6$ )  $\delta$  163.97, 158.39 (q,  $J$  = 33.9 Hz), 158.34, 153.47, 147.15, 142.19, 126.33, 126.16 (q,  $J$  = 3.7 Hz), 124.32 (q,  $J$  = 271.4 Hz), 124.27 (q,  $J$  = 32.1 Hz), 120.17, 116.47 (q,  $J$  = 295.7 Hz), 113.87, 113.12, 112.91, 108.15, 52.13, 48.52, 45.48, 45.00, 41.13, 21.53, 21.33, 16.23, 14.20. HRMS for  $\text{C}_{25}\text{H}_{27}\text{F}_3\text{N}_3\text{O}_3$   $[\text{M}+\text{H}]^+$  calc: 474.19990, found: 474.19919 (error = 0.76 ppm).

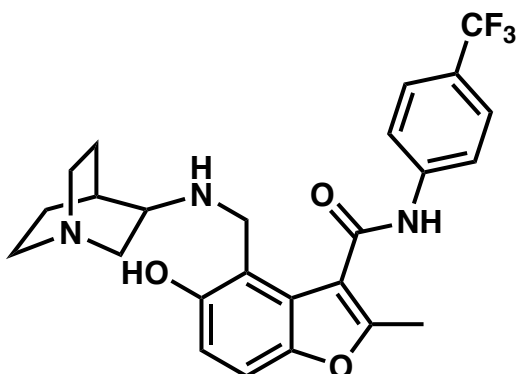

**5-hydroxy-2-methyl-4-(((1*s*,4*s*)-quinuclidin-3-yl)amino)methyl)-*N*-(4-(trifluoromethyl)phenyl)benzofuran-3-carboxamide. (7)** A solution of 5-hydroxy-2-methyl-*N*-(4-(trifluoromethyl)phenyl)benzofuran-3-carboxamide (60 mg, 0.18 mmol, 1 eq), 37% aq. formaldehyde (29  $\mu$ L, 0.36 mmol, 2 eq), triethyl amine (75  $\mu$ L, 0.54 mmol, 3 eq), and amine (71  $\mu$ L, 0.36 mmol, 2 eq) in EtOH (2 mL) was heated to 70  $^{\circ}$ C for 6 h. After the reaction was cooled to room temperature, the solvent was removed under reduced pressure. The residue was purified by chromatography on silica gel to afford the desired product (39%, 33 mg). A small amount of HPLC purified product was used for analytical characterization as the trifluoroacetic acid salt.  $^1\text{H}$  NMR (500 MHz, DMSO- $d_6$ )  $\delta$  10.92 (s,

1H), 10.58 – 10.42 (m, 2H), 9.14 (s, 1H), 8.86 (s, 1H), 7.97 (d,  $J = 8.5$  Hz, 2H), 7.78 (d,  $J = 8.5$  Hz, 2H), 7.56 (d,  $J = 8.8$  Hz, 1H), 7.02 (d,  $J = 8.9$  Hz, 1H), 4.41 (t,  $J = 9.8$  Hz, 2H), 3.35 – 3.21 (m, 4H), 3.21 – 3.12 (m, 1H), 2.64 (s, 3H), 2.54 (q,  $J = 3.2$  Hz, 1H), 2.18 (dt,  $J = 10.0, 6.7, 3.1$  Hz, 1H), 1.92 (dddd,  $J = 13.1, 9.6, 5.9, 3.4$  Hz, 1H), 1.87 – 1.69 (m, 1H).  $^{13}\text{C}$  NMR (126 MHz, DMSO- $d_6$ )  $\delta$  163.97, 158.42 (q,  $J = 33.3$  Hz), 158.32, 153.49, 147.15, 142.20, 126.33, 126.16 (q,  $J = 3.8$  Hz), 124.33 (q,  $J = 271.1$  Hz), 124.27 (q,  $J = 32.0$  Hz), 120.17, 116.63 (q,  $J = 296.4$  Hz), 113.88, 113.11, 112.92, 108.17, 52.13, 48.52, 45.47, 44.99, 41.13, 21.54, 21.34, 16.23, 14.20. HRMS for  $\text{C}_{25}\text{H}_{27}\text{F}_3\text{N}_3\text{O}_3$   $[\text{M}+\text{H}]^+$  calc: 474.19990, found: 474.20065 (error = -1.28 ppm).

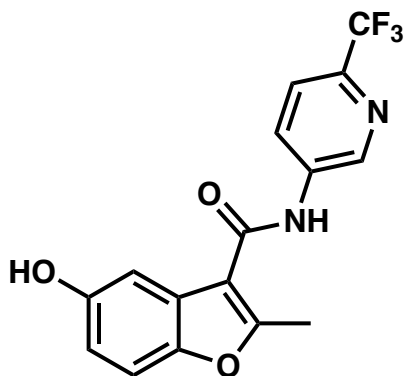

**5-hydroxy-2-methyl-N-(6-(trifluoromethyl)pyridin-3-yl)benzofuran-3-carboxamide.**

**(8)** Ethyl acetoacetate (200  $\mu\text{L}$ , 1.57 mmol, 1 eq), analine (0.254 g, 1.57 mmol, 1eq), and DMAP (48 mg, 0.393 mmol, 5 mol%) in a solution of toluene (3 mL) were heated to reflux and stirred for 14 hours. Then the reaction was cooled to room temperature. The solvent was removed under reduced pressure. The residue was purified by chromatography on silica gel to afford the desired off-white solid (150 mg). The solid was then added to p-benzoquinone (66 mg, 0.61 mmol, 1 eq) and  $\text{In}(\text{OTf})_3$  (17 mg, 30  $\mu\text{mol}$ , 5 mol %) in a solution of acetonitrile (10 mL). The solution was stirred at room temperature for 16 h. The solvent was removed under reduced pressure. The residue was purified by chromatography on silica gel to afford the desired product (91 mg, 44%). A small amount of HPLC purified product was used for analytical characterization as the trifluoroacetic acid salt.  $^1\text{H}$  NMR (500 MHz, DMSO- $d_6$ )  $\delta$  10.59 (s, 1H), 9.36 (s, 1H), 9.04 (d,  $J = 2.4$  Hz, 1H), 8.42 (dd,  $J = 8.6, 2.4$  Hz, 1H), 7.93 (d,  $J = 8.6$  Hz, 1H), 7.40 (d,  $J = 8.8$  Hz, 1H), 7.09 (d,  $J = 2.5$  Hz, 1H), 6.77 (dd,  $J = 8.8, 2.5$  Hz, 1H), 2.64 (s, 3H).  $^{13}\text{C}$  NMR (126 MHz, DMSO- $d_6$ )  $\delta$  162.83, 159.45, 153.88, 147.03, 141.57, 140.67 (q,  $J = 34.1$  Hz), 138.74, 127.48, 126.43, 121.82, 121.22 (q,  $J = 2.8$  Hz), 112.96, 112.66, 111.33, 105.27, 13.91. HRMS for  $\text{C}_{16}\text{H}_{11}\text{F}_3\text{N}_2\text{O}_3$   $[\text{M}+\text{H}]^+$  calc: 337.07945, found: 337.07982 (error = -0.84 ppm).

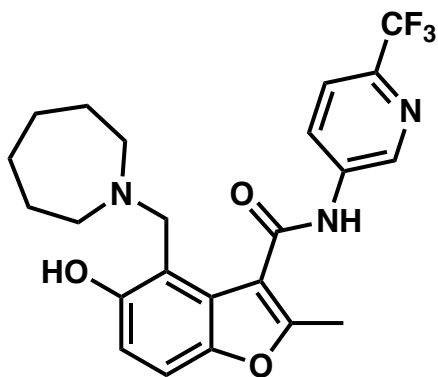

**4-(azepan-1-ylmethyl)-5-hydroxy-2-methyl-N-(6-(trifluoromethyl)pyridin-3-yl)benzofuran-3-carboxamide. (9)** A solution of 5-hydroxy-2-methyl-N-(6-(trifluoromethyl)pyridin-3-yl)benzofuran-3-carboxamide (40 mg, 0.12 mmol, 1 eq), 37% aq. formaldehyde (19  $\mu$ L, 0.24 mmol, 2 eq), and azepane (27  $\mu$ L, 0.24 mmol, 2 eq) in EtOH (2 mL) was heated to 70  $^{\circ}$ C for 6 h. After the reaction was cooled to room temperature, the solvent was removed under reduced pressure. The residue was purified by chromatography on silica gel to afford the desired product (71%, 38 mg). A small amount of HPLC purified product was used for analytical characterization as the trifluoroacetic acid salt.  $^1\text{H}$  NMR (500 MHz, DMSO- $d_6$ )  $\delta$  11.18 (s, 1H), 10.37 (s, 1H), 9.11 (d,  $J$  = 2.4 Hz, 1H), 8.85 (s, 1H), 8.40 (dd,  $J$  = 8.6, 2.4 Hz, 1H), 8.00 (d,  $J$  = 8.6 Hz, 1H), 7.60 (d,  $J$  = 8.9 Hz, 1H), 7.01 (d,  $J$  = 8.9 Hz, 1H), 4.48 (d,  $J$  = 5.5 Hz, 2H), 3.38 – 3.27 (m, 2H), 3.20 (dt,  $J$  = 13.9, 7.5 Hz, 2H), 2.65 (s, 3H), 1.84 (dt,  $J$  = 14.6, 6.9 Hz, 2H), 1.72 (dd,  $J$  = 15.5, 9.1 Hz, 2H), 1.56 (ddt,  $J$  = 16.5, 13.6, 9.6 Hz, 4H).  $^{13}\text{C}$  NMR (126 MHz, DMSO- $d_6$ )  $\delta$  164.46, 158.83, 157.99 (q,  $J$  = 33.7 Hz), 153.83, 147.19, 141.65, 141.35 (q,  $J$  = 34.3 Hz), 138.26, 127.86, 126.56, 121.71, (q,  $J$  = 273.9 Hz), 121.40 (q,  $J$  = 3.0 Hz), 116.42 (q,  $J$  = 296.1 Hz), 113.59, 113.52, 113.06, 107.39, 53.76, 51.53, 26.66, 22.48, 14.20. HRMS for  $\text{C}_{23}\text{H}_{24}\text{F}_3\text{N}_3\text{O}_3$   $[\text{M}+\text{H}]^+$  calc: 448.18425, found: 448.18518 (error = -1.79 ppm).

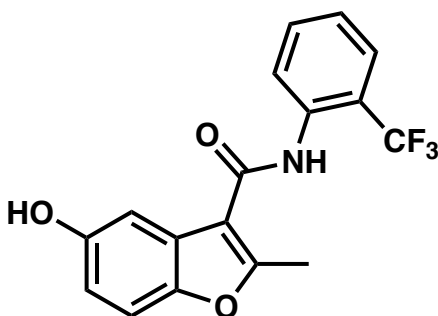

**5-hydroxy-2-methyl-N-(2-(trifluoromethyl)phenyl)benzofuran-3-carboxamide. (10)** The 3-oxo-N-(2-(trifluoromethyl)phenyl)butanamide (40 mg, 0.16 mmol, 1 eq), p-benzoquinone (18 mg, 0.16 mmol, 1 eq), and  $\text{In}(\text{OTf})_3$  (5 mg, 8.2  $\mu$ mol, 5 mol %) was added to a solution of acetonitrile (7 mL). The solution was stirred at room temperature for 16 h. The solvent was removed under reduced pressure. The residue was purified by chromatography on silica gel to afford the desired product (26 mg, 48%). A small amount of HPLC purified product was used for analytical characterization.  $^1\text{H}$  NMR (500 MHz, DMSO- $d_6$ )  $\delta$  9.70 (s, 1H), 9.29 (s, 1H), 7.81 (dd,  $J$  = 7.9, 1.4 Hz, 1H), 7.75 (t,  $J$  = 7.7, 1H), 7.60 (d,  $J$  = 7.9 Hz, 1H), 7.54 (t,  $J$  = 7.7 Hz, 1H), 7.37 (d,  $J$  = 8.8 Hz, 1H), 7.14 (d,  $J$  = 2.5 Hz, 1H), 6.75 (dd,  $J$  = 8.8, 2.5 Hz, 1H), 6.53 (s, 1H), 2.65 (s, 3H).  $^{13}\text{C}$  NMR (126 MHz, DMSO- $d_6$ )  $\delta$  163.20, 158.66, 153.75, 146.99, 135.57, 133.13, 130.75, 127.23,

126.87, 126.45 (q,  $J = 5.2$  Hz), 125.95 (q,  $J = 29.1$  Hz), 123.73 (q,  $J = 273.4$  Hz), 112.75, 112.44, 111.09, 105.30, 13.71. HRMS for  $C_{17}H_{12}F_3NO_3$   $[M+H]^+$  Calc: 336.08420, found: 336.08459 (error = -0.97 ppm).

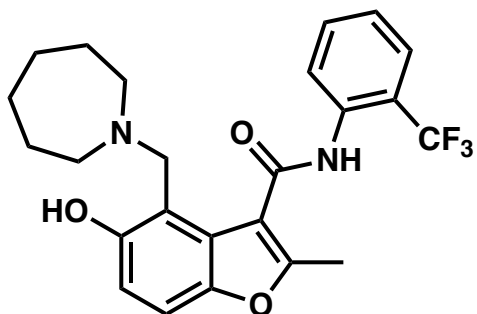

**4-(azepan-1-ylmethyl)-5-hydroxy-2-methyl-N-(2-(trifluoromethyl)phenyl)benzofuran-3-carboxamide. (11)** A solution of 5-hydroxy-2-methyl-N-(2-(trifluoromethyl)phenyl)benzofuran-3-carboxamide (37 mg, 0.110 mmol, 1 eq), 37% aq. formaldehyde (18  $\mu$ L, 0.221 mmol, 2 eq), and azepane (18  $\mu$ L, 0.221 mmol, 2 eq) in EtOH (3 mL) was heated to 70  $^{\circ}$ C for 6 h. After the reaction was cooled to room temperature, the solvent was removed under reduced pressure. The residue was purified by chromatography on silica gel to afford the desired product (65%, 32 mg). A small amount of HPLC purified product was used for analytical characterization as the trifluoroacetic acid salt.  $^1H$  NMR (500 MHz,  $DMSO-d_6$ )  $\delta$  10.55 (s, 1H), 10.29 (s, 1H), 7.87 (d,  $J = 7.8$  Hz, 1H), 7.81 (t,  $J = 7.7$  Hz, 1H), 7.74 (d,  $J = 7.8$  Hz, 1H), 7.62 (t,  $J = 7.7$  Hz, 1H), 7.58 (d,  $J = 8.9$  Hz, 1H), 6.99 (d,  $J = 8.9$  Hz, 1H), 4.48 (d,  $J = 5.6$  Hz, 2H), 3.23 (dtd,  $J = 20.3, 6.9, 3.8$  Hz, 3H), 2.72 (s, 3H), 1.89 – 1.76 (m, 2H), 1.74 – 1.62 (m, 2H), 1.54 (p,  $J = 3.0$  Hz, 4H).  $^{13}C$  NMR (126 MHz,  $DMSO-d_6$ )  $\delta$  165.54, 158.25, 157.85 (q,  $J = 32.2$  Hz), 153.76, 147.18, 134.72, 133.52, 131.19, 128.22, 126.79, 126.66 (d,  $J = 5.2$  Hz), 126.25 (q,  $J = 29.6$  Hz), 123.62 (q,  $J = 273.1$  Hz), 116.79 (q,  $J = 298.0$  Hz), 113.59, 113.13, 113.05, 107.28, 53.45, 51.44, 26.46, 22.63, 13.82. HRMS for  $C_{24}H_{25}F_3N_2O_3$   $[M+H]^+$  calc: 447.18900 found: 447.18980 (error = -1.58 ppm).

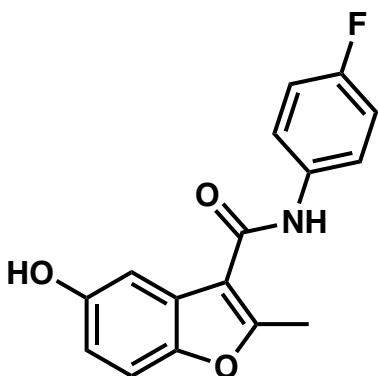

**N-(4-fluorophenyl)-5-hydroxy-2-methylbenzofuran-3-carboxamide. (12)** The N-(4-fluorophenyl)-3-oxobutanamide (374 mg, 1.92 mmol, 1 eq), p-benzoquinone (207 mg, 1.92 mmol, 1 eq), and  $In(OTf)_3$  (54 mg, 96  $\mu$ mol, 5 mol %) was added to a solution of acetonitrile (12 mL). The solution was stirred at room temperature for 16 h. The solvent was removed under reduced pressure. The residue was purified by chromatography on silica gel to afford the desired product (268 mg, 49%). A small amount of HPLC purified product was used for analytical characterization.  $^1H$  NMR (500 MHz,  $DMSO-d_6$ )  $\delta$  10.07 (s, 1H), 9.30 (s, 1H), 7.78 – 7.68 (m, 2H), 7.37 (d,  $J = 8.8$  Hz, 1H), 7.25 – 7.16 (m, 2H),

7.05 (d,  $J = 2.4$  Hz, 1H), 6.74 (dd,  $J = 8.8, 2.5$  Hz, 1H), 2.60 (s, 3H).  $^{13}\text{C}$  NMR (126 MHz,  $\text{DMSO-}d_6$ )  $\delta$  161.94, 158.22 (q,  $J = 240.1$  Hz), 158.15, 153.72, 146.98, 135.43 (d,  $J = 2.6$  Hz), 126.79, 121.82 (d,  $J = 7.9$  Hz), 115.25 (d,  $J = 22.4$  Hz), 113.30, 112.72, 111.17, 105.17, 13.77. HRMS for  $\text{C}_{16}\text{H}_{12}\text{FN}_2\text{O}_3$   $[\text{M}+\text{H}]^+$  calc: 286.08740, found: 286.08778 (error = -1.04 ppm).

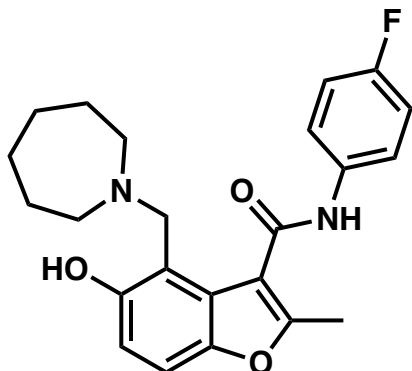

**4-(azepan-1-ylmethyl)-N-(4-fluorophenyl)-5-hydroxy-2-methylbenzofuran-3-carboxamide. (13)** A solution of *N*-(4-fluorophenyl)-5-hydroxy-2-methylbenzofuran-3-carboxamide (230 mg, 0.807 mmol, 1 eq), 37% aq. formaldehyde (131  $\mu\text{L}$ , 1.61 mmol, 2 eq), and azepane (182  $\mu\text{L}$ , 1.61 mmol, 2 eq) in EtOH (5 mL) was heated to 70  $^\circ\text{C}$  for 6 h. After the reaction was cooled to room temperature, the solvent was removed under reduced pressure. The residue was purified by chromatography on silica gel to afford the desired product (54%, 173 mg). A small amount of HPLC purified product was used for analytical characterization as the trifluoroacetic acid salt.  $^1\text{H}$  NMR (500 MHz,  $\text{DMSO-}d_6$ )  $\delta$  10.79 (s, 1H), 10.52 (s, 1H), 9.05 (s, 1H), 7.78 (dd,  $J = 8.9, 5.0$  Hz, 2H), 7.57 (d,  $J = 8.9$  Hz, 1H), 7.26 (t,  $J = 8.8$  Hz, 2H), 7.02 (d,  $J = 8.9$  Hz, 1H), 4.48 (d,  $J = 4.6$  Hz, 2H), 3.33 – 3.25 (m, 2H), 3.25 – 3.15 (m, 2H), 2.61 (s, 3H), 1.80 (m, 2H), 1.77 – 1.69 (m, 3H), 1.55 (m, 4H).  $^{13}\text{C}$  NMR (126 MHz,  $\text{DMSO-}d_6$ )  $\delta$  163.55, 159.69, 157.98 (q,  $J = 32.2$ ), 157.81 (d,  $J = 9.2$  Hz), 153.81, 147.15, 134.87 (d,  $J = 2.7$  Hz), 126.69, 122.11 (d,  $J = 8.0$  Hz), 117.26 (q,  $J = 300.2$  Hz), 115.56 (d,  $J = 22.3$  Hz), 113.98, 113.47, 112.95, 107.25, 53.66, 51.59, 26.60, 22.58, 14.02. HRMS for  $\text{C}_{23}\text{H}_{25}\text{FN}_2\text{O}_3$   $[\text{M}+\text{H}]^+$  calc: 397.18492, found: 397.19275 (error = -0.94 ppm).

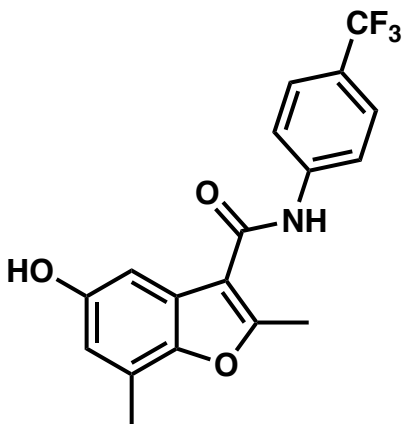

**5-hydroxy-2,7-dimethyl-N-(4-(trifluoromethyl)phenyl)benzofuran-3-carboxamide. (14)** 3-oxo-*N*-(4-(trifluoromethyl)phenyl)butanamide (230 mg, 0.939 mmol, 1 eq) was added with 2-methyl-*p*-benzoquinone (115 mg, 0.939 mmol, 1 eq) and  $\text{In}(\text{OTf})_3$  (26 mg, 47  $\mu\text{mol}$ , 5 mol %) to a solution of acetonitrile (20 mL). The solution was stirred at room



temperature for 16 h. The solvent was removed under reduced pressure. The residue was purified by chromatography on silica gel to afford the desired product (73 mg, 27%). A small amount of HPLC purified product was used for analytical characterization.  $^1\text{H}$  NMR (400 MHz,  $\text{DMSO-}d_6$ )  $\delta$  10.34 (s, 1H), 9.19 (s, 1H), 7.94 (d,  $J = 8.2$  Hz, 2H), 7.72 (d,  $J = 8.5$  Hz, 2H), 6.90 – 6.84 (m, 1H), 6.59 (dd,  $J = 2.4, 1.0$  Hz, 1H), 2.62 (s, 3H), 2.39 (s, 3H).  $^{13}\text{C}$  NMR (126 MHz,  $\text{DMSO-}d_6$ )  $\delta$  162.59, 158.39, 153.72, 146.10, 142.73, 126.06, 126.00 (q,  $J = 4.2$  Hz), 124.42 (q,  $J = 271.6$  Hz), 123.50 (q,  $J = 31.8$  Hz), 120.99, 119.81, 113.79, 113.37, 102.65, 14.79, 13.89. HRMS for  $\text{C}_{18}\text{H}_{14}\text{F}_3\text{NO}_3$   $[\text{M}+\text{H}]^+$  calc: 350.09985, found: 350.10021 (error = -0.98 ppm).

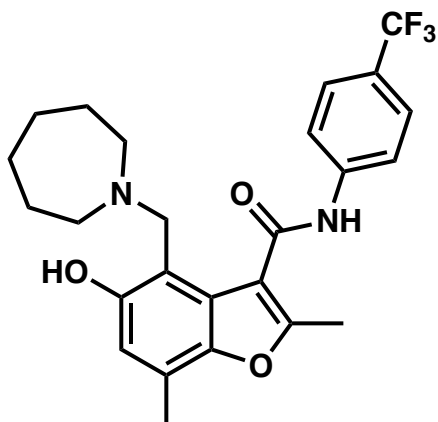

**4-(azepan-1-ylmethyl)-5-hydroxy-2,7-dimethyl-N-(4-(trifluoromethyl)phenyl)benzofuran-3-carboxamide. (15)** To a solution of 5-hydroxy-2,7-dimethyl-N-(4-(trifluoromethyl)phenyl)benzofuran-3-carboxamide (125 mg, 0.36 mmol, 1 eq), 37% aq. formaldehyde (58  $\mu\text{L}$ , 0.72 mmol, 2 eq), and azepane (80  $\mu\text{L}$ , 0.72 mmol, 2 eq) in EtOH (3 mL) was heated to 70  $^\circ\text{C}$  for 6 h. After the reaction was cooled to room temperature, the solvent was removed under reduced pressure. The residue was purified by chromatography on silica gel to afford the desired product (61%, 101 mg). A small amount of HPLC purified product was used for analytical characterization as the trifluoroacetic acid salt.  $^1\text{H}$  NMR (500 MHz,  $\text{DMSO-}d_6$ )  $\delta$  10.98 (s, 1H), 10.25 (s, 1H), 8.88 (s, 1H), 7.96 (d,  $J = 8.4$  Hz, 2H), 7.79 (d,  $J = 8.6$  Hz, 2H), 6.83 (s, 1H), 4.44 (d,  $J = 5.5$  Hz, 2H), 3.34 – 3.24 (m, 2H), 3.17 (ddd,  $J = 14.3, 10.1, 4.4$  Hz, 2H), 2.62 (s, 3H), 2.44 (s, 3H), 1.82 (dt,  $J = 14.8, 7.1$  Hz, 2H), 1.71 (dd,  $J = 16.1, 8.8$  Hz, 2H), 1.64 – 1.47 (m, 4H).  $^{13}\text{C}$  NMR (126 MHz,  $\text{DMSO-}d_6$ )  $\delta$  164.22, 158.00 (q,  $J = 33.4$  Hz), 157.89, 153.66, 146.23, 142.09, 126.25 (q,  $J = 3.9$  Hz), 126.01, 124.37 (q,  $J = 32.1$  Hz), 124.29 (q,  $J = 271.6$  Hz), 123.61, 120.10, 116.50 (q,  $J = 296.3$  Hz), 114.10, 113.76, 104.79, 53.57, 51.50, 26.63, 22.53, 14.87, 14.14. HRMS for  $\text{C}_{25}\text{H}_{27}\text{F}_3\text{N}_2\text{O}_3$   $[\text{M}+\text{H}]^+$  calc: 461.20465, found: 461.20570 (error = -1.91 ppm).

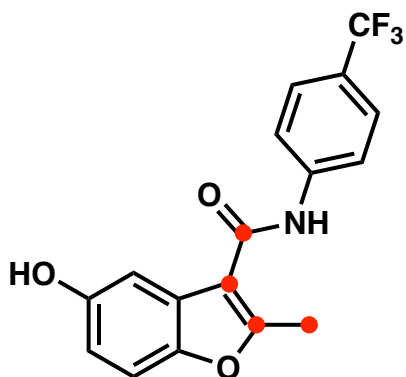

**4-<sup>13</sup>C-labeled 5-hydroxy-2-methyl-N-(4-(trifluoromethyl)phenyl)benzofuran-3-carboxamide. (16)** Red dots in structure indicate a uniformly <sup>13</sup>C labeled carbon. 4-<sup>13</sup>C-labeled ethyl acetoacetate (100 μL, 0.762 mmol, 1 eq), analine (96 μL, 0.762 mmol, 1eq), and DMAP (5 mg, 38 μmol, 5 mol%) was added to a solution of toluene (1.5 mL) were heated to reflux and stirred for 14 hours. Then the reaction was cooled to room temperature. The solvent was removed under reduced pressure. The orange solid was purified by trituration with cold toluene to afford the desired product, a white powder (91 mg mmol, 1eq). The white powder was then added to p-benzoquinone (39 mg, 0.365 mmol, 1 eq), and In(OTf)<sub>3</sub> (10 mg, 18 μmol, 5 mol %) in a solution of acetonitrile (5 mL) without further purification. The solution was stirred at room temperature for 16 h. The solvent was removed under reduced pressure. The residue was purified by chromatography on silica gel to afford the desired product (68 mg, 26% over two steps). A small amount of HPLC purified product was used for analytical characterization. <sup>1</sup>H NMR (500 MHz, DMSO-*d*<sub>6</sub>) δ 10.38 (d, *J* = 2.6 Hz, 1H), 9.32 (s, 1H), 7.94 (d, *J* = 8.5 Hz, 2H), 7.73 (d, *J* = 8.5 Hz, 2H), 7.39 (d, *J* = 8.7 Hz, 1H), 7.05 (t, *J* = 2.4 Hz, 1H), 6.75 (dd, *J* = 8.8, 2.5 Hz, 1H), 2.61 (ddd, *J* = 129.4, 7.2, 3.1 Hz, 3H). <sup>13</sup>C NMR (126 MHz, DMSO-*d*<sub>6</sub>) δ 162.44 (dd, *J* = 75.1, 7.1 Hz), 158.73 (ddd, *J* = 74.3, 52.0, 7.0 Hz), 153.80 (d, *J* = 4.5 Hz), 146.98, 142.71, 126.65 (d, *J* = 55.0 Hz), 126.01 (q, *J* = 3.9 Hz), 124.41 (q, *J* = 271.2 Hz), 123.51 (q, *J* = 32.1 Hz), 119.79 (d, *J* = 2.1 Hz), 113.09 (td, *J* = 74.6, 4.2 Hz), 112.84, 111.26 (d, *J* = 2.5 Hz), 105.15 (d, *J* = 4.2 Hz), 13.81 (dd, *J* = 52.1, 4.3 Hz). HRMS for C<sub>17</sub>H<sub>12</sub>F<sub>3</sub>NO<sub>3</sub> [M+H]<sup>+</sup> Calc: 340.09817, found: 340.09802 (error = -0.44 ppm).

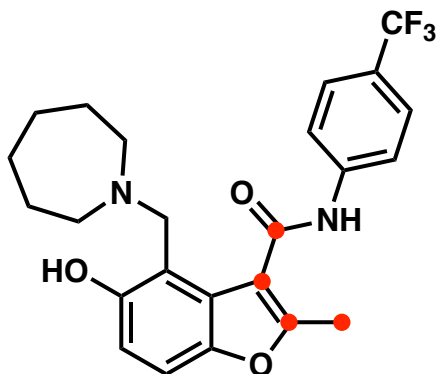

**4-<sup>13</sup>C-labeled 4-(azepan-1-ylmethyl)-5-hydroxy-2-methyl-N-(4-(trifluoromethyl)phenyl)benzofuran-3-carboxamide. (17)** Red dots in structure indicate a uniformly <sup>13</sup>C labeled carbon. To a solution of 4-<sup>13</sup>C-labeled 5-hydroxy-2-methyl-N-(4-(trifluoromethyl)phenyl)benzofuran-3-carboxamide (35 mg, 0.103 mmol, 1

eq), 37% aq. formaldehyde (17  $\mu$ L, 0.206 mmol, 2 eq), and azepane (23  $\mu$ L, 0.206 mmol, 2 eq) in EtOH (2 mL) was heated to 70  $^{\circ}$ C for 16 h. After the reaction was cooled to room temperature, the solvent was removed under reduced pressure. The residue was purified by chromatography on silica gel to afford the desired product. (62%, 29 mg).  $^1\text{H}$  NMR (500 MHz, DMSO- $d_6$ )  $\delta$  11.01 (s, 1H), 10.76 (d,  $J$  = 2.5 Hz, 1H), 7.96 (d,  $J$  = 8.4 Hz, 2H), 7.73 (d,  $J$  = 8.6 Hz, 2H), 7.30 (d,  $J$  = 8.8 Hz, 1H), 6.74 (d,  $J$  = 8.8 Hz, 1H), 3.87 (s, 2H), , 2.52 – 2.51 (m, 4H), 2.48 (ddd,  $J$  = 129.5, 7.2, 3.4 Hz, 3H), 1.44 (s, 8H).  $^{13}\text{C}$  NMR (126 MHz, DMSO- $d_6$ )  $\delta$  163.36 (dd,  $J$  = 74.6, 6.7 Hz), 155.37 (ddd,  $J$  = 73.3, 52.9, 6.6 Hz), 153.80 (d,  $J$  = 4.3 Hz), 147.04, 142.77, 126.11 (q,  $J$  = 3.8 Hz), 125.40 (q,  $J$  = 55.5 Hz), 124.40 ( $J$  = 271.1 Hz), 123.50 (q,  $J$  = 32.0 Hz), 114.79 (td,  $J$  = 73.9, 4.9 Hz), 114.10 (d,  $J$  = 5.4 Hz), 113.03, 109.88 (t,  $J$  = 2.6 Hz), 54.25, 54.21, 26.99, 26.13, 13.28 (dd,  $J$  = 53.1, 5.0 Hz). HRMS for  $\text{C}_{24}\text{H}_{25}\text{F}_3\text{N}_2\text{O}_3$   $[\text{M}+\text{H}]^+$  calc 451.20297, found: 451.20305 (error = 0.18 ppm).

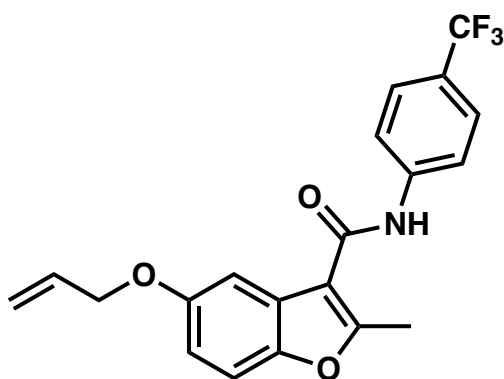

**5-(allyloxy)-2-methyl-N-(4-**

**(trifluoromethyl)phenyl)benzofuran-3-carboxamide. (18)** To a solution of hydroxybenzoquinone (224 mg, 667  $\mu$ mol, 1 equiv.) in DMF (3.3 mL, 0.2M) was added potassium carbonate (138 mg, 1.00 mmol, 1.5 equiv.) and allyl bromide (60.6  $\mu$ L, 701  $\mu$ mol, 1.05 equiv), and the resulting suspension was stirred overnight. The reaction mixture was then diluted in ethyl acetate (100 mL), washed with Brine (5 x 50 mL), dried over  $\text{Na}_2\text{SO}_4$ , concentrated *in vacuo*, and the residue was purified by flash chromatography (4 g column, 0% to 50% EtOAc/Hexanes) to afford the title compound (182 mg, 485  $\mu$ mol, 73% yield) as a colorless solid.  $^1\text{H}$  NMR (400 MHz, Chloroform- $d$ )  $\delta$  7.75 (d,  $J$  = 8.3 Hz, 2H), 7.69 (s, 1H), 7.64 (d,  $J$  = 8.6 Hz, 2H), 7.38 (d,  $J$  = 9.0 Hz, 1H), 7.17 (d,  $J$  = 2.5 Hz, 1H), 6.93 (dd,  $J$  = 8.9, 2.5 Hz, 1H), 6.08 (ddt,  $J$  = 17.2, 10.6, 5.3 Hz, 1H), 5.44 (dq,  $J$  = 17.3, 1.6 Hz, 1H), 5.32 (dq,  $J$  = 10.5, 1.4 Hz, 1H), 4.58 (dt,  $J$  = 5.4, 1.5 Hz, 2H), 2.73 (s, 3H).  $^{13}\text{C}$  NMR (101 MHz,  $\text{CDCl}_3$ )  $\delta$  162.5, 162.0, 155.9, 148.8, 141.0, 141.0, 133.4, 126.6 (q,  $J$  = 3.7 Hz), 126.4 (q,  $J$  = 31.5 Hz), 125.9, 124.2 (q,  $J$  = 271.6 Hz), 119.8, 118.0, 113.1, 112.2, 104.1, 70.0, 14.4. HRMS for  $\text{C}_{20}\text{H}_{17}\text{F}_3\text{NO}_3$   $[\text{M}+\text{H}]^+$  calc. 376.11550, found 376.11759 (error = -4.68).

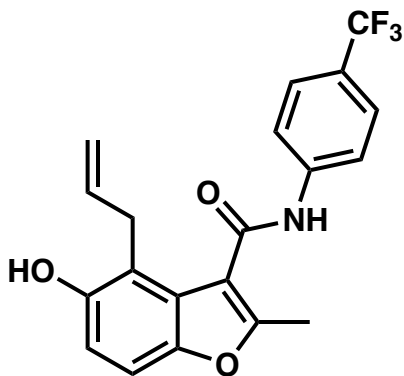

**4-allyl-5-hydroxy-2-methyl-N-(4-(trifluoromethyl)phenyl)benzofuran-3-carboxamide. (19)** To a flask containing the allyl ether (528 mg, 1.41 mmol) under argon was added N,N-dimethylaniline (14 mL, 0.1 M). The flask was attached to an argon balloon and heated in an oil bath to 185°C for 25h. The reaction mixture was cooled to room temperature, diluted with EtOAc (200 mL), washed with aq. 1 M HCl (4 x 100 mL), brine (100 mL) and dried (Na<sub>2</sub>SO<sub>4</sub>). The organic solution was then filtered, concentrated onto silica gel, and purified by automated flash chromatography (12 g column, Hexanes to 50% EtOAc/Hexanes) to afford the title compound (380 mg, 1.01 mmol, 72% yield) as a brown oil and used directly without further purification. A small amount of HPLC purified product was used for analytical characterization. <sup>1</sup>H NMR (500 MHz, DMSO-*d*<sub>6</sub>) δ 10.80 (s, 1H), 9.16 (s, 1H), 7.94 (d, *J* = 8.5 Hz, 2H), 7.73 (d, *J* = 8.5 Hz, 2H), 7.25 (d, *J* = 8.8 Hz, 1H), 6.84 (d, *J* = 8.8 Hz, 1H), 5.78 (ddt, *J* = 16.6, 10.0, 6.3 Hz, 1H), 4.89 – 4.63 (m, 2H), 3.57 (d, *J* = 6.4 Hz, 2H), 2.48 (s, 3H). <sup>13</sup>C NMR (126 MHz, DMSO) δ 164.0, 155.6, 151.5, 147.7, 143.1, 137.2, 126.6 (q, *J* = 3.8 Hz), 126.2, 124.8 (q, *J* = 271.2 Hz), 124.1 (q, *J* = 32.0 Hz), 119.8, 117.4, 115.3, 115.1, 113.1, 109.2, 29.9, 13.8. HRMS for C<sub>20</sub>H<sub>17</sub>F<sub>3</sub>NO<sub>3</sub> [M+H]<sup>+</sup> calc. 376.11550, found 376.11649 (error = -2.13).

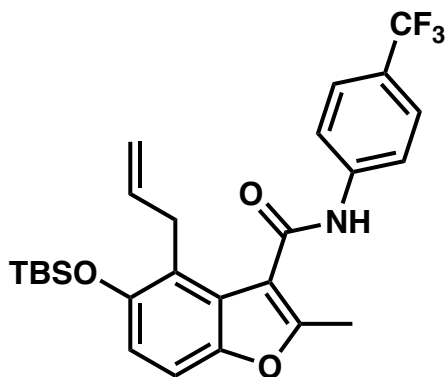

**4-allyl-5-((tert-butyldimethylsilyl)oxy)-2-methyl-N-(4-(trifluoromethyl)phenyl)benzofuran-3-carboxamide. (20)** To a solution of the hydroxybenzofuran (51 mg, 0.153 mmol, 1 equiv.) in DMF (1.5 mL, 0.1 M) was added imidazole (42 mg, 0.613 mmol, 4 equiv.) and TBSCl (46 mg, 0.307 mmol, 2 equiv.). The resulting solution was stirred at room temperature for 3.5 h, then diluted in EtOAc (30 mL), washed with brine (3 x 10 mL), dried (Na<sub>2</sub>SO<sub>4</sub>), and concentrated onto silica gel. Purification by flash chromatography (4 g column, Hexanes to CH<sub>2</sub>Cl<sub>2</sub>) afforded the title compound (25 mg, 0.0502 mmol, 33% yield). <sup>1</sup>H NMR (500 MHz, Chloroform-*d*) δ 7.82 (s, 1H), 7.73 (d, *J* = 8.4 Hz, 2H), 7.61 (d, *J* = 10.0 Hz, 1H), 7.22 (d, *J* = 6.7 Hz, 1H), 6.83 (d, *J* = 8.7 Hz, 1H), 6.17 – 5.91 (m, 1H), 5.04 (d, *J* = 9.5 Hz, 1H), 4.76 (d, *J* = 17.3 Hz, 1H), 3.63 (s, 2H), 2.57 (s, 3H), 0.99 (s, 9H), 0.22 (s, 6H). <sup>13</sup>C NMR (126 MHz, CDCl<sub>3</sub>) δ 163.7, 158.3, 150.2, 149.0, 140.9, 138.2, 126.5 (q, *J* = 3.8 Hz), 126.3 (q, *J* = 32.7 Hz),

125.7, 124.2 (q,  $J = 271.6$  Hz), 120.6, 119.6, 116.0, 115.3, 114.5, 109.5, 31.0, 25.9, 18.4, 13.7, -4.0. HRMS for  $C_{26}H_{31}F_3NO_3Si$   $[M+H]^+$  calc. 490.20198, found 490.20257 (error = -0.89).

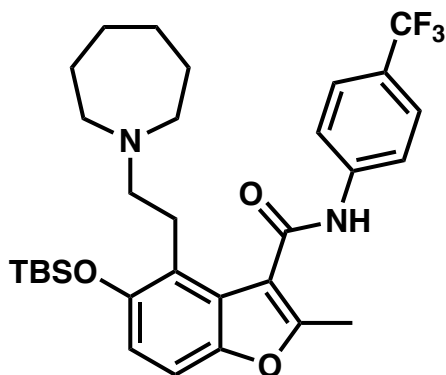

**4-(2-(azepan-1-yl)ethyl)-5-((tert-butyl)dimethylsilyloxy)-2-methyl-N-(4-(trifluoromethyl)phenyl)benzofuran-3-carboxamide. (21)** To a suspension of the allyl benzofuran (50 mg, 102  $\mu$ mol, 1 equiv.) in *tert*-butanol (1.3 mL) was added THF (530  $\mu$ L),  $H_2O$  (140  $\mu$ L), *N*-methylmorpholine-*N*-oxide (14 mg, 122  $\mu$ mol, 1.2 equiv.) and osmium tetroxide (2.5 wt% in *t*BuOH, 51.9  $\mu$ L, 5.11  $\mu$ mol, 5 mol%). The resulting solution was allowed to stir at room temperature for 12 h. To the reaction mixture was added sodium periodate (66 mg, 306  $\mu$ mol, 3 equiv.) as a solution in  $H_2O$  (165  $\mu$ L), and the solution was stirred for an additional 75 min, after which the reaction was quenched with 10% aqueous  $NaHSO_3$  (10 mL) and sat. aqueous  $NaHCO_3$  and extracted with ethyl acetate (3 x 10 mL). The combined organic layers were washed with brine (10 mL), dried over  $Na_2SO_4$ , and concentrated *in vacuo* to give 53 mg of a yellowish solid. This solid was dissolved in  $CH_2Cl_2$  (1 mL) and methanol (1 mL) and hexamethylenimine (23.0  $\mu$ L, 204  $\mu$ mol, 2 equiv.) was added and the reaction was stirred overnight. To the reaction solution was added sodium triacetoxyborohydride (43 mg, 204  $\mu$ mol, 2 equiv.) and stirred for an additional hour, after which the mixture was concentrated *in vacuo* and partitioned between ethyl acetate (10 mL) and 2 M aqueous  $Na_2CO_3$  (10 mL). The organic layer was dried over  $Na_2SO_4$  and concentrated *in vacuo*, and the residue purified by flash chromatography (4 g column, 0% to 50% EtOAc/Hexanes) to afford the title compound (29 mg, 50.5  $\mu$ mol, 49% over 2 steps) as a colorless solid.  $^1H$  NMR (500 MHz, Chloroform-*d*)  $\delta$  9.68 (s, 1H), 7.76 (d,  $J = 9.3$  Hz, 2H), 7.61 (d,  $J = 8.3$  Hz, 2H), 7.16 (d,  $J = 8.6$  Hz, 1H), 6.77 (d,  $J = 8.6$  Hz, 1H), 3.19 (t,  $J = 7.2$  Hz, 2H), 2.85 (t,  $J = 7.4$  Hz, 2H), 2.58 (s, 6H), 1.50 – 1.34 (m, 6H), 1.02 (s, 9H), 0.24 (s, 6H).  $^{13}C$  NMR (126 MHz,  $CDCl_3$ )  $\delta$  164.4, 158.0, 150.0, 149.0, 141.4, 126.7 (q,  $J = 32.7$  Hz), 126.3 (q,  $J = 3.7$  Hz), 126.1, 124.2 (q,  $J = 271.7$  Hz), 121.2, 115.9, 114.8, 109.2, 57.3, 56.3, 26.9, 26.1, 18.5, 14.0, -3.8. HRMS for  $C_{31}H_{42}F_3N_2O_3Si$   $[M+H]^+$  calc. 575.29113, found 575.29115 (error = 1.02).

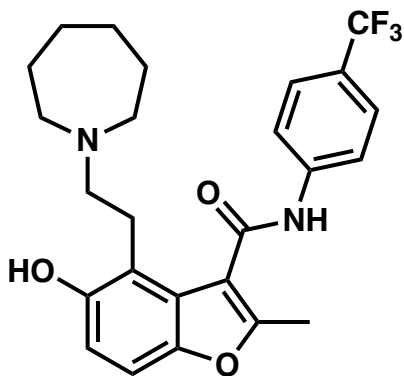

**4-(2-(azepan-1-yl)ethyl)-5-hydroxy-2-methyl-N-(4-(trifluoromethyl)phenyl)benzofuran-3-carboxamide. (22)** To a solution of the silyl ether (20 mg, 34.8  $\mu\text{mol}$ , 1 equiv.) in THF was added acetic acid (4.0  $\mu\text{L}$ , 69.6  $\mu\text{mol}$ , 2 equiv.) and tetrabutylammonium fluoride (1 M in THF, 70  $\mu\text{L}$ , 69.6  $\mu\text{mol}$ , 2 equiv.) and the resulting solution was stirred for 1 h. The mixture was concentrated *in vacuo*, and the residue dissolved in methanol and purified by reverse-phase HPLC (25% to 95%  $\text{CH}_3\text{CN}/\text{H}_2\text{O}$  + 0.1% TFA, 10 min gradient). The resulting fractions were combined and lyophilized to afford the product (19.8 mg, 34.5  $\mu\text{mol}$ , 99% yield) as a slightly brown solid.  $^1\text{H}$  NMR (500 MHz, Methanol- $d_4$ )  $\delta$  7.93 (d,  $J$  = 8.3 Hz, 2H), 7.71 (d,  $J$  = 8.5 Hz, 2H), 7.27 (d,  $J$  = 8.8 Hz, 1H), 6.85 (d,  $J$  = 8.8 Hz, 1H), 3.50 – 3.38 (m, 4H), 3.27 – 3.19 (m, 4H), 2.59 (s, 3H), 1.93 – 1.82 (m, 2H), 1.82 – 1.62 (m, 6H).  $^{13}\text{C}$  NMR (126 MHz, MeOD)  $\delta$  166.6, 162.9 (d,  $J$  = 36.0 Hz), 158.2, 153.2, 149.7, 143.2, 127.5 – 127.2 (m), 125.6 (d,  $J$  = 270.8 Hz), 121.2, 118.2 (d,  $J$  = 290.8 Hz), 115.2, 114.1, 113.6, 111.4, 57.8, 56.2, 27.3, 24.9, 23.5, 13.7. HRMS for  $\text{C}_{25}\text{H}_{28}\text{F}_3\text{N}_2\text{O}_3$   $[\text{M}+\text{H}]^+$  calc. 461.20465, found 461.20509 (error = -0.60).

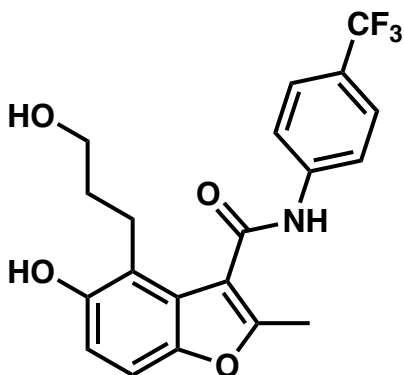

**5-hydroxy-4-(3-hydroxypropyl)-2-methyl-N-(4-(trifluoromethyl)phenyl)benzofuran-3-carboxamide. (23)** To an ice cooled solution of the allyl benzofuran (117 mg, 311  $\mu\text{mol}$ , 1 equiv.) in THF (4.6 mL) under argon atmosphere was added  $\text{BH}_3\cdot\text{SMe}_2$  (2M in THF, 1.55 mL, 10 equiv.). The solution was warmed to room temperature and stirred overnight, after which it was cooled to 0°C and hydrogen peroxide (30 wt% in  $\text{H}_2\text{O}$ , 1.4 mL, 40 equiv.) and NaOH (3M in  $\text{H}_2\text{O}$ , 1.4 mL, 40 equiv) were added sequentially. The solution was stirred for 4 h at 0°C, then quenched with aqueous 5% citric acid (30 mL) and extracted with ethyl acetate (3 x 30 mL). The combined organic layers were washed with brine (30 mL), dried ( $\text{Na}_2\text{SO}_4$ ), and concentrated *in vacuo* and the residue was purified by flash chromatography (4 g, 0% to 100% EtOAc/Hexanes) to afford the title compound (44 mg, 112  $\mu\text{mol}$ , 36% yield).  $^1\text{H}$  NMR (500 MHz, DMSO- $d_6$ )  $\delta$  10.85 (s, 1H), 9.04 (s, 1H), 7.94 (d,  $J$  = 8.4 Hz, 2H), 7.73 (d,  $J$  = 8.4 Hz, 2H), 7.20 (d,  $J$  = 8.7 Hz, 1H), 6.80 (d,  $J$  = 8.7 Hz, 1H), 4.29 (t,  $J$  = 5.2 Hz,

1H), 3.21 (td,  $J = 6.9, 5.1$  Hz, 2H), 2.79 – 2.68 (m, 2H), 2.46 (s, 3H), 1.69 – 1.51 (m, 3H).  $^{13}\text{C}$  NMR (126 MHz, DMSO)  $\delta$  163.7, 154.6, 150.9, 147.2, 142.6, 126.1 (q,  $J = 3.7$  Hz), 125.7, 124.4 (q,  $J = 271.4$  Hz), 123.7 (q,  $J = 32.1$  Hz), 119.7, 119.4, 114.9, 112.5, 108.2, 60.9, 32.8, 22.4, 13.2. HRMS for  $\text{C}_{20}\text{H}_{19}\text{F}_3\text{NO}_4$   $[\text{M}+\text{H}]^+$  calc. 394.12607, found 394.12631 (error = -0.46).

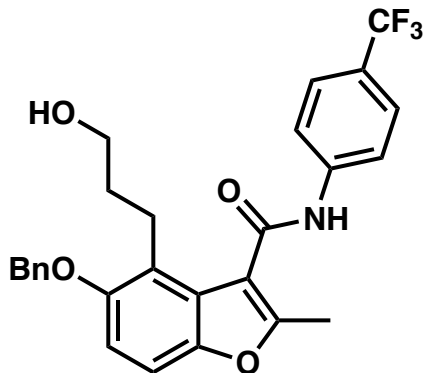

**5-(benzyloxy)-4-(3-hydroxypropyl)-2-methyl-N-(4-(trifluoromethyl)phenyl)benzofuran-3-carboxamide. (24)** To a solution of the hydroxybenzofuran (44 mg, 112  $\mu\text{mol}$ , 1 equiv.) in DMF (1 mL) was added potassium carbonate (39 mg, 280  $\mu\text{mol}$ , 2.5 equiv.) and benzyl bromide (14.6  $\mu\text{L}$ , 123  $\mu\text{mol}$ , 1.1 equiv.) and the reaction mixture was stirred for 3 days at room temperature. The reaction was diluted in ethyl acetate (30 mL), washed with brine (3 x 10 mL), dried ( $\text{Na}_2\text{SO}_4$ ), and concentrated *in vacuo* and the residue was purified by flash chromatography (4 g column, 0% to 70% EtOAc/Hexanes) to afford the title compound (25 mg, 51.7  $\mu\text{mol}$ , 46% yield) as a colorless solid.  $^1\text{H}$  NMR (500 MHz,  $\text{DMSO}-d_6$ )  $\delta$  7.95 (d,  $J = 8.3$  Hz, 2H), 7.74 (d,  $J = 8.5$  Hz, 2H), 7.48 (d,  $J = 6.9$  Hz, 2H), 7.43 – 7.34 (m, 3H), 7.31 (t,  $J = 7.3$  Hz, 1H), 7.09 (d,  $J = 9.0$  Hz, 1H), 5.14 (s, 2H), 3.22 (t,  $J = 6.9$  Hz, 2H), 2.95 – 2.78 (m, 2H), 2.49 (s, 3H), 1.64 (dq,  $J = 9.9, 7.0$  Hz, 2H).  $^{13}\text{C}$  NMR (126 MHz, DMSO)  $\delta$  163.4, 155.4, 152.1, 148.2, 142.4, 137.6, 128.4, 127.6, 127.2, 126.16 (q,  $J = 3.8$  Hz), 125.8, 124.37 (q,  $J = 271.3$  Hz), 123.76 (q,  $J = 32.1$  Hz), 122.9, 119.4, 114.8, 110.7, 108.4, 70.7, 60.9, 33.2, 22.6, 13.2. HRMS for  $\text{C}_{27}\text{H}_{25}\text{F}_3\text{NO}_4$   $[\text{M}+\text{H}]^+$  calc. 484.17302, found 484.17385 (error = -1.33).

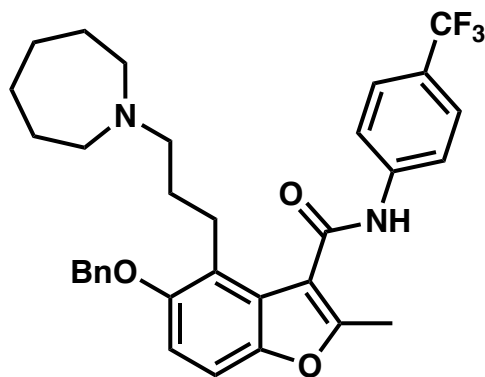

**4-(3-(azepan-1-yl)propyl)-5-(benzyloxy)-2-methyl-N-(4-(trifluoromethyl)phenyl)benzofuran-3-carboxamide. (25)** To a suspension of the hydroxypropylbenzofuran (20 mg, 41.4  $\mu\text{mol}$ , 1 equiv.) in  $\text{CH}_2\text{Cl}_2$  (1 mL) was added Dess-Martin periodinane (36 mg, 85.2  $\mu\text{mol}$ , 2.5 equiv.). The resulting mixture was stirred for 40 min, then diluted in ethyl acetate (20 mL), washed with a 1:1 mixture of 5% aqueous  $\text{Na}_2\text{S}_2\text{O}_3$  and saturated aqueous  $\text{NaHCO}_3$  (3 x 10 mL). The organic layer was washed further with brine (10 mL), dried over  $\text{Na}_2\text{SO}_4$ , and

concentrated *in vacuo* to obtain 22 mg of brown solid which was used without further purification. The obtained solid was redissolved in CH<sub>2</sub>Cl<sub>2</sub> (1 mL) and methanol (1 mL) and to this solution was added hexamethylenimine (9.32 μL, 82.7 μmol, 2 equiv.) and the solution was stirred overnight. Sodium triacetoxyborohydride was then added and the solution was stirred for an additional 2.5 h, after which it was partitioned between 2M aqueous Na<sub>2</sub>CO<sub>3</sub> (20 mL) and ethyl acetate (10 mL). The aqueous layer was further extracted with ethyl acetate (2 x 10 mL) and the combined organic layers were washed with brine (10 mL), dried over Na<sub>2</sub>SO<sub>4</sub>, concentrated *in vacuo*, and the resulting residue was purified by flash chromatography (4 g column, Hexanes to EtOAc) to obtain the title compound (10.2 mg, 18.1 μmol, 44% yield) as a brown solid. <sup>1</sup>H NMR (400 MHz, Methanol-*d*<sub>4</sub>) δ 7.92 (d, *J* = 8.4 Hz, 2H), 7.71 (d, *J* = 8.6 Hz, 2H), 7.52 – 7.45 (m, 2H), 7.43 – 7.30 (m, 4H), 7.13 (d, *J* = 9.0 Hz, 1H), 5.14 (s, 2H), 3.26 (ddd, *J* = 13.6, 7.5, 2.8 Hz, 2H), 3.08 – 2.88 (m, 6H), 2.57 (s, 3H), 2.10 – 1.96 (m, 2H), 1.82 – 1.51 (m, 8H). <sup>13</sup>C NMR (101 MHz, MeOD) δ 166.5, 158.0, 154.4, 150.5, 143.3, 138.9, 129.7, 129.1, 128.9, 127.4 (q, *J* = 3.5 Hz), 127.3 (q, *J* = 32.5 Hz), 125.6 (q, *J* = 270.7 Hz), 121.8, 121.2, 115.6, 111.7, 110.4, 72.7, 58.4, 55.8, 27.3, 25.6, 24.7, 24.5, 18.5, 13.5. HRMS for C<sub>33</sub>H<sub>36</sub>F<sub>3</sub>N<sub>2</sub>O<sub>3</sub> [M+H]<sup>+</sup> calc. 565.26725, found 565.26692 (error = 1.03).

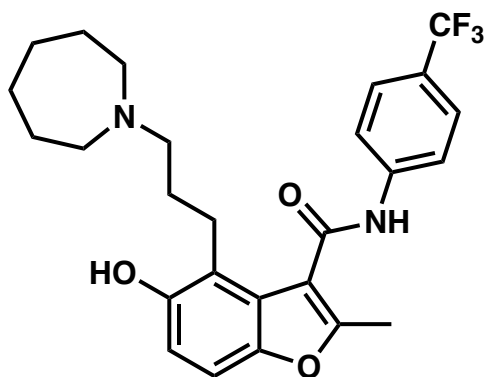

**4-(3-(azepan-1-yl)propyl)-5-hydroxy-2-methyl-N-(4-(trifluoromethyl)phenyl)benzofuran-3-carboxamide. (26)** To a solution of the benzyl ether (9.6 mg, 14.2 μmol) in methanol (1 mL) under nitrogen atmosphere was added palladium on carbon (10 wt%, 2 mg). The reaction was pressurized to 60 psi under hydrogen gas and stirred overnight. The reaction mixture was filtered through celite and purified directly by reverse-phase HPLC (10 min gradient, 10% to 75% CH<sub>3</sub>CN/H<sub>2</sub>O + 0.1% TFA) to obtain 3.9 mg of the title compound as a colorless solid. <sup>1</sup>H NMR (500 MHz, Methanol-*d*<sub>4</sub>) δ 7.92 (d, *J* = 8.3 Hz, 2H), 7.71 (d, *J* = 8.4 Hz, 2H), 7.20 (d, *J* = 8.8 Hz, 1H), 6.82 (d, *J* = 8.8 Hz, 1H), 3.37 (ddd, *J* = 13.6, 7.7, 2.7 Hz, 2H), 3.15 – 3.03 (m, 4H), 2.91 (t, *J* = 7.6 Hz, 2H), 2.55 (s, 3H), 2.06 (qt, *J* = 8.1, 6.2 Hz, 2H), 1.92 – 1.57 (m, 8H). <sup>13</sup>C NMR (126 MHz, MeOD) δ 166.8, 157.3, 152.6, 149.8, 143.3, 127.4 (q, *J* = 3.7 Hz), 127.3 (q, *J* = 32.7 Hz), 127.2, 125.6 (q, *J* = 270.7 Hz), 121.2, 118.7, 115.6, 113.7, 110.4, 58.4, 55.9, 27.3, 25.4, 24.7, 24.3, 13.4. HRMS for C<sub>26</sub>H<sub>30</sub>F<sub>3</sub>N<sub>2</sub>O<sub>3</sub> [M+H]<sup>+</sup> calc. 475.22030, found 475.22080 (error = -0.44).

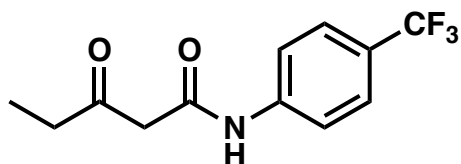

**3-oxo-N-(4-(trifluoromethyl)phenyl)pentanamide. (27)** A 20 mL scintillation vial was charged with a solution of 4-(trifluoromethyl)aniline (495 μL, 3.94 mmol, 1 equiv.) in toluene (0.75 mL, 5 M) and ethyl propionylacetate (561



$\mu\text{L}$ , 3.94 mmol, 1 equiv.) and dimethylaminopyridine (24 mg, 197  $\mu\text{mol}$ , 5 mol%) were added sequentially. The vial was capped tightly and the solution was heated to 110°C for 18h, after which the solution was allowed to cool to room temperature and sit for 24h to allow crystallization of the product. The solution was cooled further on ice and the crystalline product was collected by filtration, washed with cold toluene (3 x 2 mL), and dried under vacuum to obtain 245 mg (945  $\mu\text{mol}$ , 24% yield) of colorless crystals.  $^1\text{H}$  NMR (400 MHz, Chloroform-*d*)  $\delta$  9.51 (s, 1H), 7.68 (d,  $J$  = 8.4 Hz, 2H), 7.57 (d,  $J$  = 8.4 Hz, 2H), 3.59 (s, 2H), 2.62 (q,  $J$  = 7.2 Hz, 2H), 1.13 (t,  $J$  = 7.2 Hz, 3H).  $^{19}\text{F}$  NMR (376 MHz, Chloroform-*d*)  $\delta$  -62.16.  $^{13}\text{C}$  NMR (101 MHz, Chloroform-*d*)  $\delta$ .  $^{13}\text{C}$  NMR (101 MHz,  $\text{CDCl}_3$ )  $\delta$  208.4, 163.9, 140.7, 126.39 (q,  $J$  = 3.8 Hz), 126.37 (q,  $J$  = 32.8 Hz), 124.19 (q,  $J$  = 271.7 Hz), 119.8, 77.2, 48.4, 37.7, 7.5. HRMS for  $\text{C}_{12}\text{H}_{13}\text{F}_3\text{NO}_2$  [ $\text{M}+\text{H}$ ] $^+$  calc. 260.08929, found 260.08988 (error = -2.09).

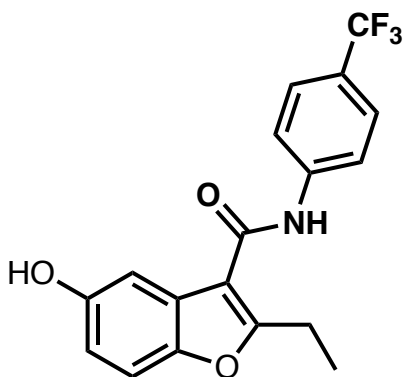

**2-ethyl-5-hydroxy-N-(4-**

**(trifluoromethyl)phenyl)benzofuran-3-carboxamide. (28)** To a solution of the  $\beta$ -ketoamide (200 mg, 772  $\mu\text{mol}$ , 1 equiv.) in acetonitrile (3.9 mL, 0.2 M) was added p-benzoquinone (125 mg, 1.16 mmol, 1.5 equiv.) and indium (III) trifluoromethylsulfonate (22 mg, 38.6  $\mu\text{mol}$ , 5 mol%). The solution was stirred for 18h, then concentrated directly onto silica gel and purified by flash chromatography (12 g column, 0% to 50% EtOAc/Hexane) to obtain 74 mg (212  $\mu\text{mol}$ , 27% yield) of product.  $^1\text{H}$  NMR (500 MHz, DMSO-*d*<sub>6</sub>)  $\delta$  10.45 (s, 1H), 9.34 (s, 1H), 7.96 (d,  $J$  = 8.5 Hz, 2H), 7.73 (d,  $J$  = 8.5 Hz, 2H), 7.41 (d,  $J$  = 8.8 Hz, 1H), 7.06 (d,  $J$  = 2.5 Hz, 1H), 6.78 (dd,  $J$  = 8.8, 2.5 Hz, 1H), 3.01 (q,  $J$  = 7.5 Hz, 2H), 1.28 (t,  $J$  = 7.6 Hz, 3H).  $^{13}\text{C}$  NMR (126 MHz, DMSO)  $\delta$  163.3, 162.5, 153.8, 147.0, 142.7, 126.5, 126.0 (q,  $J$  = 3.8 Hz), 124.4 (q,  $J$  = 271.3 Hz), 123.6 (q,  $J$  = 32.0 Hz), 119.8, 113.0, 112.5, 111.4, 105.2, 20.9, 12.2. HRMS for  $\text{C}_{18}\text{H}_{15}\text{F}_3\text{NO}_3$  [ $\text{M}+\text{H}$ ] $^+$  calc. 350.09985, found 350.10051 (error = -1.56).

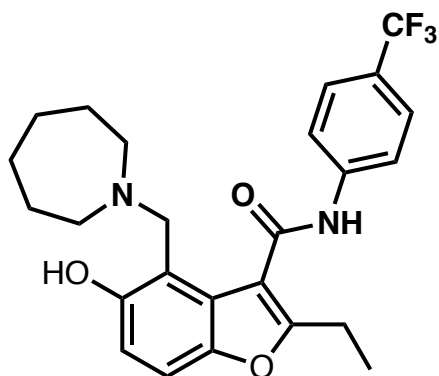

**4-(azepan-1-ylmethyl)-2-ethyl-5-hydroxy-N-(4-**

**(trifluoromethyl)phenyl)benzofuran-3-carboxamide. (29)** To a solution of the benzofuran (22 mg, 63.0  $\mu\text{mol}$ , 1 equiv.) in ethanol (630  $\mu\text{L}$ , 0.1 M) in a 4 mL scintillation

vial was added hexamethyleneimine (21.3  $\mu\text{L}$ , 189  $\mu\text{mol}$ , 3 equiv.) and formaldehyde (37 wt% in  $\text{H}_2\text{O}$ , 14.1  $\mu\text{L}$ , 189  $\mu\text{mol}$ , 3 equiv.). The scintillation vial was capped tightly and heated in an oil bath at  $80^\circ\text{C}$  for 18h, after which it was cooled to room temperature and purified directly by HPLC (25% to 95%  $\text{CH}_3\text{CN}/\text{H}_2\text{O}$  + 0.1% TFA, 10 min gradient). The obtained fractions were combined and lyophilized to afford the product (23 mg, 40.6  $\mu\text{mol}$ , 64% yield) as a colorless solid in its trifluoroacetate salt form.  $^1\text{H}$  NMR (500 MHz,  $\text{DMSO-}d_6$ )  $\delta$  11.07 (s, 1H), 10.47 (s, 1H), 8.92 (s, 1H), 7.96 (d,  $J = 8.4$  Hz, 2H), 7.79 (d,  $J = 8.4$  Hz, 2H), 7.60 (d,  $J = 8.9$  Hz, 1H), 7.02 (d,  $J = 8.9$  Hz, 1H), 4.44 (d,  $J = 5.2$  Hz, 2H), 3.39 – 3.24 (m, 2H), 3.24 – 3.10 (m, 2H), 2.99 (q,  $J = 7.6$  Hz, 2H), 1.89 – 1.64 (m, 4H), 1.64 – 1.40 (m, 4H), 1.28 (t,  $J = 7.6$  Hz, 3H).  $^{13}\text{C}$  NMR (126 MHz,  $\text{DMSO}$ )  $\delta$  164.1, 162.0, 157.9 (q,  $J = 31.1$  Hz), 153.8, 147.1, 142.1, 126.7, 126.3 (q,  $J = 3.8$  Hz), 124.4 (q,  $J = 32.0$  Hz), 124.3 (q,  $J = 271.5$  Hz), 120.0, 117.2 (q,  $J = 299.7$  Hz), 113.6, 113.1, 113.0, 107.3, 53.8, 51.6, 26.7, 22.3, 21.1, 11.8. HRMS for  $\text{C}_{25}\text{H}_{28}\text{F}_3\text{N}_2\text{O}_3$   $[\text{M}+\text{H}]^+$  calc. 461.20465, found 461.20572 (error = -1.99).

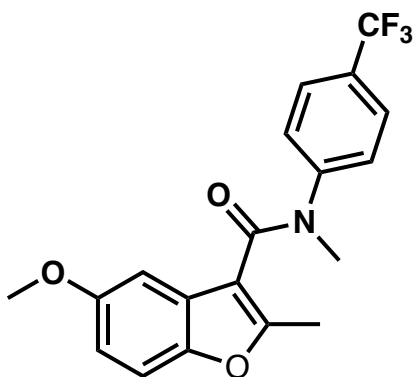

**5-methoxy-N,2-dimethyl-N-(4-(trifluoromethyl)phenyl)benzofuran-3-carboxamide. (30)** To a solution of the hydroxybenzofuran (67 mg, 200  $\mu\text{mol}$ , 1 equiv.) in THF (2 mL, 0.1 M) at  $0^\circ\text{C}$  was added sodium hydride (60 wt%, 40 mg, 1.00 mmol, 5 equiv.). After stirring for 1h, methyl iodide (62.3  $\mu\text{L}$ , 1.00 mmol, 5 equiv) was added and the solution was allowed to warm to room temperature and stir for 18h. The solution was cooled to  $0^\circ\text{C}$  and quenched by addition of a 5% aqueous citric acid solution (10 mL) and extracted with ethyl acetate (3 x 10 mL). The combined organic layers were washed with brine (10 mL), dried over  $\text{Na}_2\text{SO}_4$ , and purified by flash chromatography (4 g column, 0% to 30% EtOAc/Hexanes) to afford the product (29 mg, 79.8  $\mu\text{mol}$ , 40% yield) as a colorless solid.  $^1\text{H}$  NMR (500 MHz,  $\text{Chloroform-}d$ )  $\delta$  7.48 (d,  $J = 8.3$  Hz, 2H), 7.25 – 7.19 (m, 3H), 6.86 (d,  $J = 2.5$  Hz, 1H), 6.79 (dd,  $J = 8.9, 2.6$  Hz, 1H), 3.78 (s, 3H), 3.57 (s, 3H), 2.23 (s, 3H).  $^{13}\text{C}$  NMR (126 MHz,  $\text{CDCl}_3$ )  $\delta$  165.9, 156.9, 156.4, 148.6, 147.4, 128.1 (q,  $J = 32.9$  Hz), 127.3, 126.3 (q,  $J = 3.8$  Hz), 125.7, 123.8 (q,  $J = 272.0$  Hz), 113.2, 111.5, 102.7, 56.1, 37.8, 14.0. HRMS for  $\text{C}_{19}\text{H}_{17}\text{F}_3\text{NO}_3$   $[\text{M}+\text{H}]^+$  calc. 364.11550, found 364.11673 (error = -3.71).

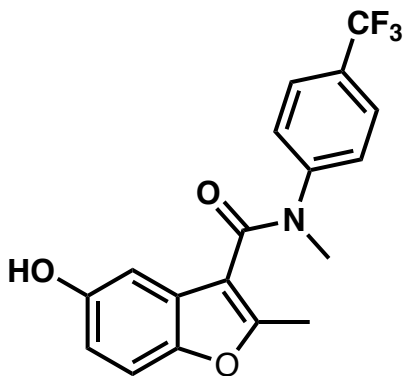

**5-hydroxy-N,2-dimethyl-N-(4-(trifluoromethyl)phenyl)benzofuran-3-carboxamide. (31)** To a solution of the methoxybenzofuran (23 mg, 63.3  $\mu\text{mol}$ , 1 equiv.) in  $\text{CH}_2\text{Cl}_2$  (317  $\mu\text{L}$ ) at  $0^\circ\text{C}$  was added boron tribromide (1 M in  $\text{CH}_2\text{Cl}_2$ , 317  $\mu\text{L}$ , 317  $\mu\text{mol}$ , 5 equiv.). After 30 min, the reaction was quenched by dropwise addition of methanol. The reaction was concentrated *in vacuo* and purified by flash chromatography (4 g column, 0% to 60% EtOAc/Hexanes) to afford the title compound (14 mg, 37.7  $\mu\text{mol}$ , 60% yield) as a colorless solid.  $^1\text{H}$  NMR (500 MHz, Methanol- $d_4$ )  $\delta$  7.55 (d,  $J$  = 8.4 Hz, 2H), 7.40 (d,  $J$  = 8.3 Hz, 2H), 7.15 (d,  $J$  = 8.8 Hz, 1H), 6.73 (d,  $J$  = 2.5 Hz, 1H), 6.67 (dd,  $J$  = 8.9, 2.5 Hz, 1H), 3.55 (s, 3H), 2.26 (s, 3H).  $^{13}\text{C}$  NMR (126 MHz, MeOD)  $\delta$  167.9, 158.0, 154.8, 149.3, 148.5, 129.4 (q,  $J$  = 32.6 Hz), 128.3, 127.6, 127.1 (q,  $J$  = 3.8 Hz), 125.3 (q,  $J$  = 270.9 Hz), 114.1, 113.8, 112.0, 105.7, 38.1, 13.6. HRMS for  $\text{C}_{18}\text{H}_{15}\text{F}_3\text{NO}_3$   $[\text{M}+\text{H}]^+$  calc. 350.09985, found 350.10068 (error = -2.20).

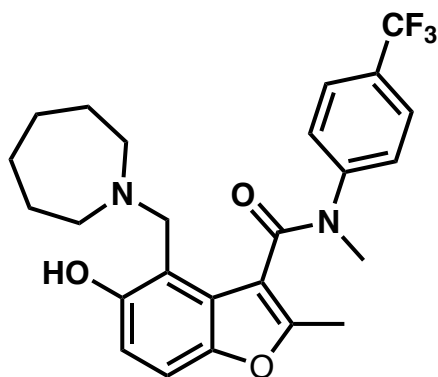

**4-(azepan-1-ylmethyl)-5-hydroxy-N,2-dimethyl-N-(4-(trifluoromethyl)phenyl)benzofuran-3-carboxamide. (32)** To a solution of the hydroxybenzofuran (12 mg, 35.4  $\mu\text{mol}$ , 1 equiv.) in ethanol (354  $\mu\text{L}$ , 0.1 M) in a 4 mL scintillation vial was added hexamethylenimine (12.0  $\mu\text{L}$ , 106  $\mu\text{mol}$ , 3 equiv.) and formaldehyde (37 wt% in  $\text{H}_2\text{O}$ , 7.92  $\mu\text{L}$ , 106  $\mu\text{mol}$ , 3 equiv.). The scintillation vial was capped tightly and heated in an oil bath at  $80^\circ\text{C}$  for 18h, after which it was cooled to room temperature, diluted in methanol, and purified directly by HPLC (35% to 95%  $\text{CH}_3\text{CN}/\text{H}_2\text{O}$  + 0.1% TFA, 10 min gradient). The obtained fractions were combined and lyophilized to afford the product (15 mg, 32.5  $\mu\text{mol}$ , 92% yield) as a colorless solid in its trifluoroacetate salt form.  $^1\text{H}$  NMR (500 MHz, Methanol- $d_4$ )  $\delta$  7.63 (d,  $J$  = 8.2 Hz, 2H), 7.44 (d,  $J$  = 8.2 Hz, 2H), 7.40 (d,  $J$  = 8.8 Hz, 1H), 6.94 (d,  $J$  = 8.9 Hz, 1H), 4.76 (d,  $J$  = 13.7 Hz, 1H), 4.47 (d,  $J$  = 13.3 Hz, 1H), 3.73 – 3.54 (m, 4H), 3.49 – 3.38 (m, 1H), 2.21 – 1.92 (m, 6H), 1.91 – 1.64 (m, 5H).  $^{13}\text{C}$  NMR (126 MHz, MeOD)  $\delta$  169.2, 162.5 (q,  $J$  = 34.9 Hz), 157.6, 155.3, 149.8, 148.2, 129.9 (q,  $J$  = 32.9 Hz), 128.5, 128.0, 127.3 (q,  $J$  = 3.7 Hz), 125.2 (q,  $J$  = 271.5 Hz), 118.0 (q,  $J$  = 293.7 Hz), 115.1, 114.2, 113.5, 107.9,

53.3, 38.5, 27.7, 27.5, 25.3, 14.0. HRMS for  $C_{25}H_{28}F_3N_2O_3$   $[M+H]^+$  calc. 461.20465, found 461.20580 (error = -2.27).

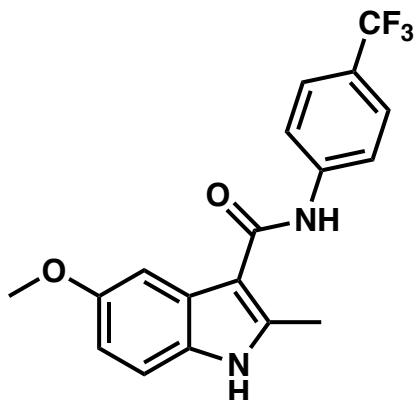

**5-methoxy-2-methyl-N-(4-(trifluoromethyl)phenyl)-1H-indole-3-carboxamide. (33)** To a solution of 5-methoxy-2-methyl-1H-indole-3-carboxylic acid (62 mg, 300  $\mu$ mol, 1 equiv.) in DMF (1 mL, 0.3M) was added 1,1'-carbonyldiimidazole (49 mg, 300  $\mu$ mol, 1 equiv.). The resulting solution was allowed to stir for 30 min at room temperature, after which 4-(trifluoromethyl)aniline (113  $\mu$ L, 900  $\mu$ mol, 3 equiv.) was added. The resulting solution was heated to 120°C and stirred overnight. The reaction mixture was diluted with ethyl acetate (30 mL), washed with brine (5 x 10 mL), dried ( $Na_2SO_4$ ), and concentrated *in vacuo* and the residue purified by flash chromatography (4 g column, 0% to 40% EtOAc/Hexanes) to afford the product (68 mg, 195  $\mu$ mol, 65% yield) as a slightly yellow solid.  $^1H$  NMR (500 MHz, DMSO- $d_6$ )  $\delta$  11.52 (s, 1H), 9.88 (s, 1H), 7.96 (d,  $J$  = 8.5 Hz, 2H), 7.68 (d,  $J$  = 8.5 Hz, 2H), 7.27 (d,  $J$  = 8.7 Hz, 1H), 7.24 (d,  $J$  = 2.5 Hz, 1H), 6.77 (dd,  $J$  = 8.7, 2.5 Hz, 1H), 3.77 (s, 3H), 2.61 (s, 3H).  $^{13}C$  NMR (126 MHz, DMSO)  $\delta$  164.5, 154.2, 143.6, 140.7, 129.6, 126.9, 125.8 (q,  $J$  = 3.8 Hz), 124.6 (q,  $J$  = 271.1 Hz), 122.6 (q,  $J$  = 31.8 Hz), 119.4, 111.8, 110.9, 108.0, 102.0, 55.2, 13.4. HRMS for  $C_{18}H_{16}F_3N_2O_2$   $[M+H]^+$  calc. 349.11584, found 349.11613 (error = -0.54).

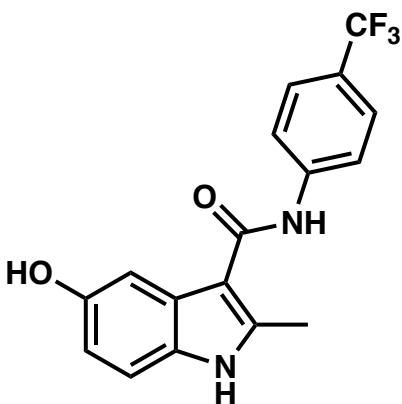

**5-hydroxy-2-methyl-N-(4-(trifluoromethyl)phenyl)-1H-indole-3-carboxamide. (34)** A suspension of methoxyindole (68 mg, 195  $\mu$ mol, 1 equiv.) in  $CH_2Cl_2$  (3 mL) under argon was cooled to -78°C. To this was added boron tribromide (1 M in  $CH_2Cl_2$ , 976  $\mu$ L, 5 equiv.) and the solution was warmed to room temperature and stirred for 1 h. The solution then cooled to 0°C and quenched with the addition of methanol (2 mL) and stirred an additional 10 min. The reaction mixture was then diluted with  $CH_2Cl_2$  (40 mL), washed with a 1:1 mixture of  $H_2O$  and Brine (3 x 20 mL). The combined organic layers were dried ( $Na_2SO_4$ ), concentrated *in vacuo*, and the residue

was purified by flash chromatography (4 g column, 0% to 50% EtOAc/Hexanes) to afford the title compound (34 mg, 101  $\mu$ mol, 52% yield) as a colorless residue.  $^1\text{H}$  NMR (400 MHz, Methanol- $d_4$ )  $\delta$  7.87 (d,  $J$  = 8.4 Hz, 2H), 7.63 (d,  $J$  = 8.5 Hz, 2H), 7.23 – 7.13 (m, 2H), 6.70 (dd,  $J$  = 8.6, 2.3 Hz, 1H), 2.64 (s, 3H).  $^{13}\text{C}$  NMR (126 MHz, MeOD)  $\delta$  167.9, 153.1, 144.1, 142.9, 131.3, 128.6, 127.0 (q,  $J$  = 3.8 Hz), 126.0 (q,  $J$  = 32.5 Hz), 125.9 (q,  $J$  = 270.3 Hz), 121.0, 112.6, 112.4, 108.5, 105.0, 13.5. HRMS for  $\text{C}_{17}\text{H}_{14}\text{F}_3\text{N}_2\text{O}_2$   $[\text{M}+\text{H}]^+$  calc. 335.10019, found 335.10197 (error = -4.61).

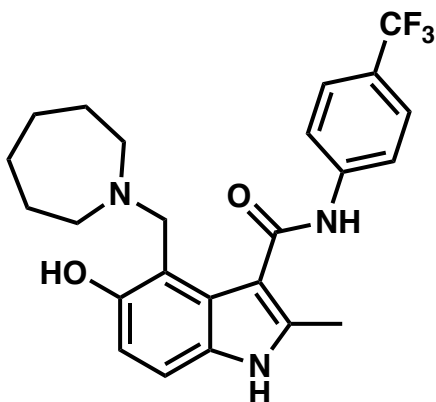

**4-(azepan-1-ylmethyl)-5-hydroxy-2-methyl-N-(4-(trifluoromethyl)phenyl)-1H-indole-3-carboxamide. (35)** To a solution of WH-227F-042 (24 mg, 73.0  $\mu$ mol, 1 equiv.) in ethanol (730  $\mu$ L, 0.1 M) in a 4 mL scintillation vial was added hexamethyleneimine (24.6  $\mu$ L, 219  $\mu$ mol, 3 equiv.) and formaldehyde (37 wt% in  $\text{H}_2\text{O}$ , 16.3  $\mu$ L, 219  $\mu$ mol, 3 equiv.). The scintillation vial was capped tightly and heated in an oil bath at 80°C for 18h, after which it was cooled to room temperature, diluted in methanol to 1.4 mL, and purified directly by HPLC (25% to 95%  $\text{CH}_3\text{CN}/\text{H}_2\text{O}$  + 0.1% TFA, 10 min gradient). The obtained fractions were combined and lyophilized to afford the product (15 mg, 44.6  $\mu$ mol, 61% yield) as a colorless solid in its trifluoroacetate salt form.  $^1\text{H}$  NMR (500 MHz,  $\text{DMSO}-d_6$ )  $\delta$  11.78 (s, 1H), 10.59 (s, 1H), 9.84 (s, 1H), 9.25 (s, 1H), 7.95 (d,  $J$  = 8.5 Hz, 2H), 7.75 (d,  $J$  = 8.5 Hz, 2H), 7.35 (d,  $J$  = 8.6 Hz, 1H), 6.87 (d,  $J$  = 8.6 Hz, 1H), 4.49 (s, 2H), 3.33 – 3.27 (m, 2H), 3.27 – 3.13 (m, 2H), 2.56 (s, 3H), 1.94 – 1.81 (m, 2H), 1.81 – 1.68 (m, 2H), 1.68 – 1.49 (m, 4H).  $^{13}\text{C}$  NMR (126 MHz,  $\text{DMSO}$ )  $\delta$  167.2, 157.8 (q,  $J$  = 30.6 Hz), 151.9, 142.7, 140.0, 129.7, 126.2, 126.1 (q,  $J$  = 4.0, 3.5 Hz), 124.4 (q,  $J$  = 271.2 Hz), 123.7 (q,  $J$  = 32.2 Hz), 119.7, 117.4 (q,  $J$  = 301.3 Hz), 114.1, 111.3, 108.8, 105.4, 53.3, 52.1, 26.4, 23.1, 13.6. HRMS for  $\text{C}_{24}\text{H}_{27}\text{F}_3\text{N}_3\text{O}_2$   $[\text{M}+\text{H}]^+$  calc. 446.20499, found 446.20502 (error = -0.02).

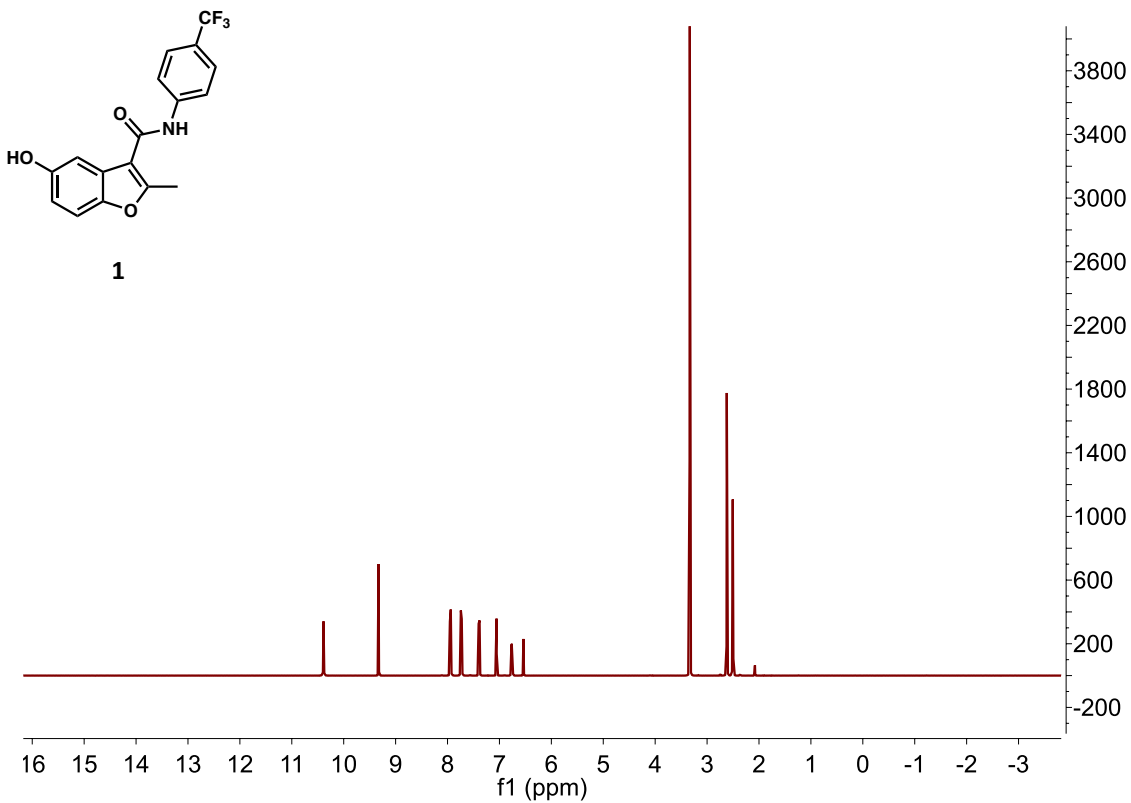

Supplementary Figure 10: <sup>1</sup>H NMR of 1

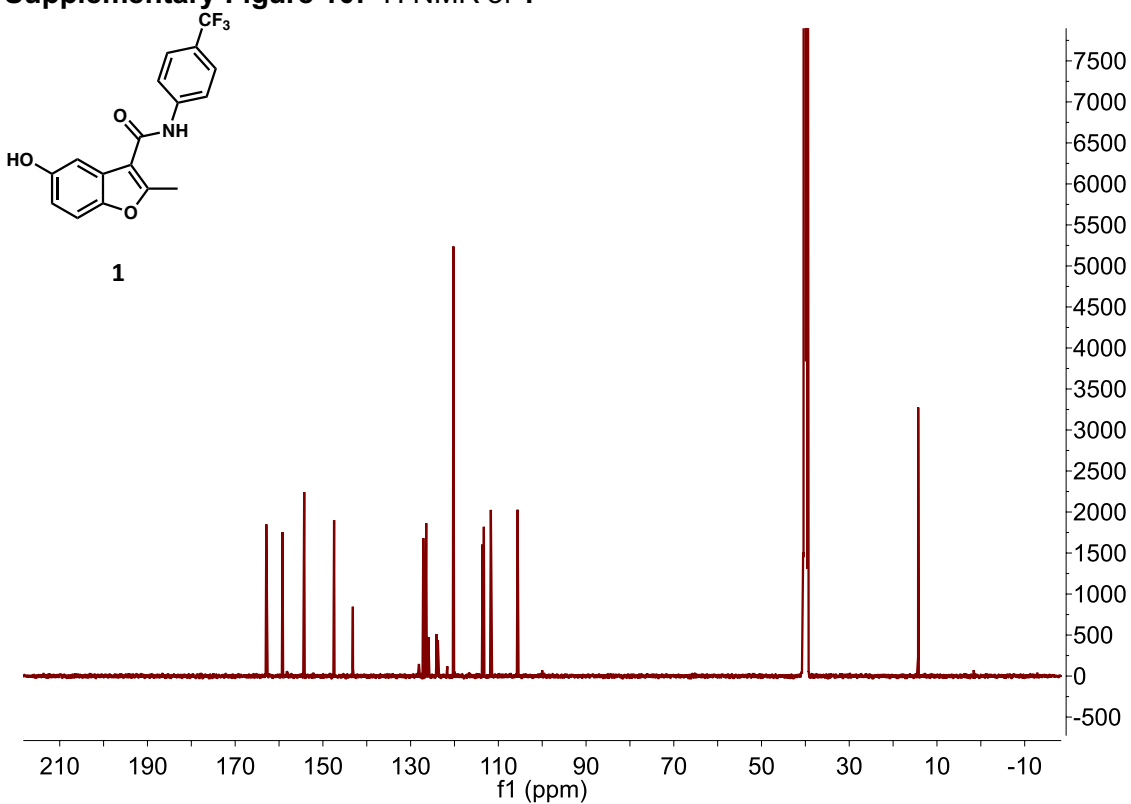

Supplementary Figure 11: <sup>13</sup>C NMR of 1

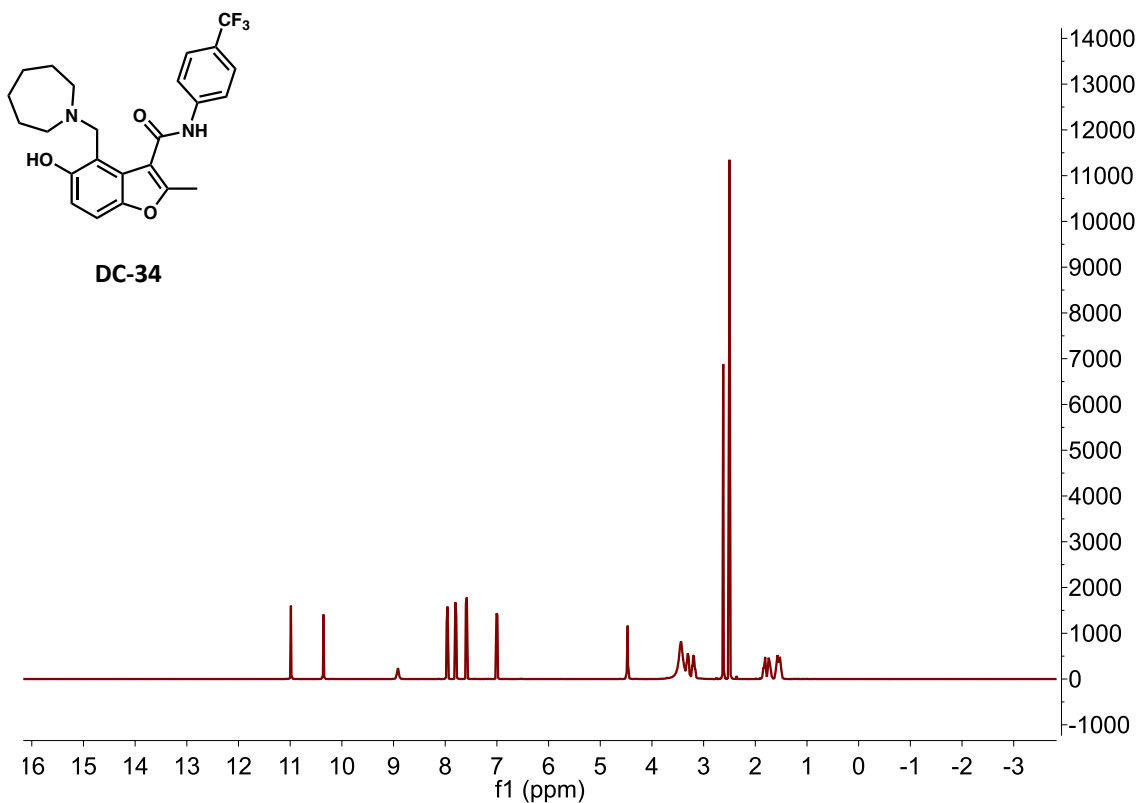

**Supplementary Figure 12:  $^1\text{H}$  NMR of DC-34**

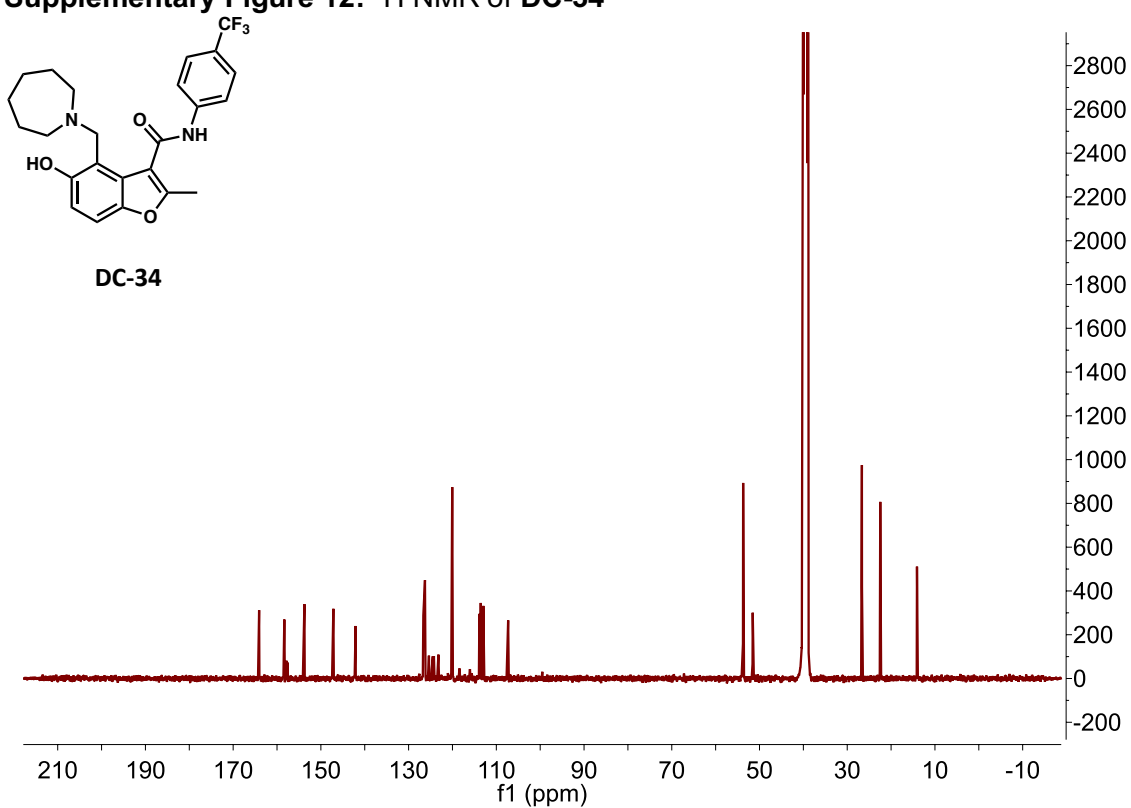

**Supplementary Figure 13:  $^{13}\text{C}$  NMR of DC-34**

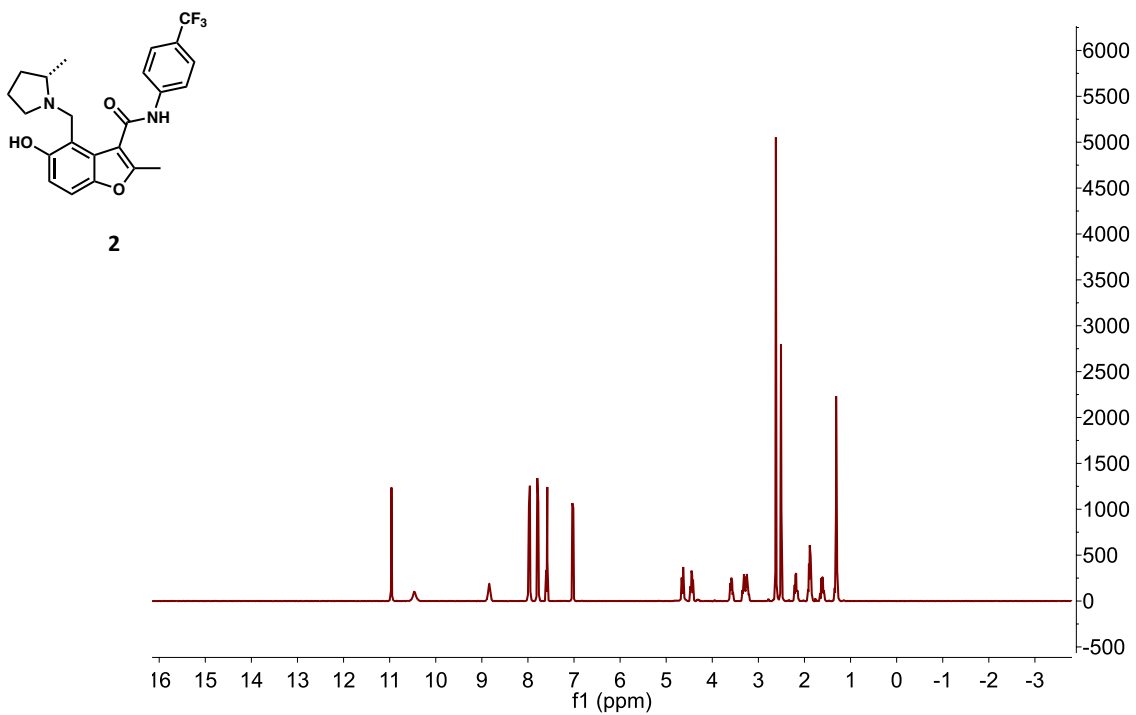

**Supplementary Figure 14: <sup>1</sup>H NMR of 2**

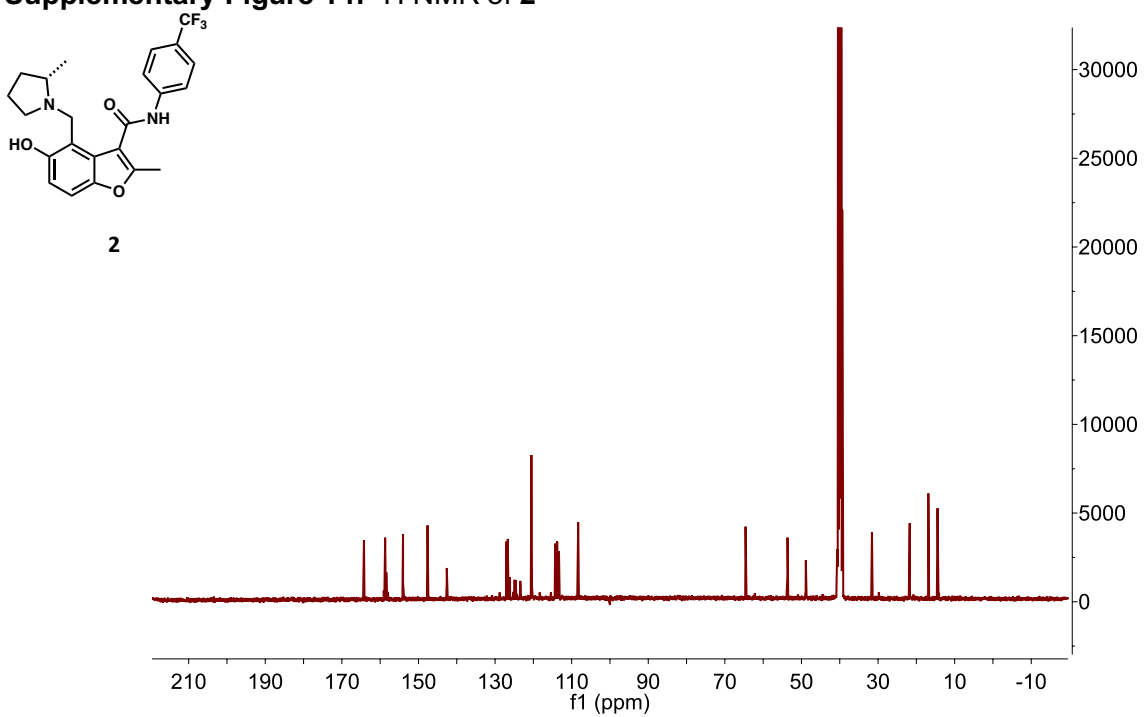

**Supplementary Figure 15: <sup>13</sup>C NMR of 2**



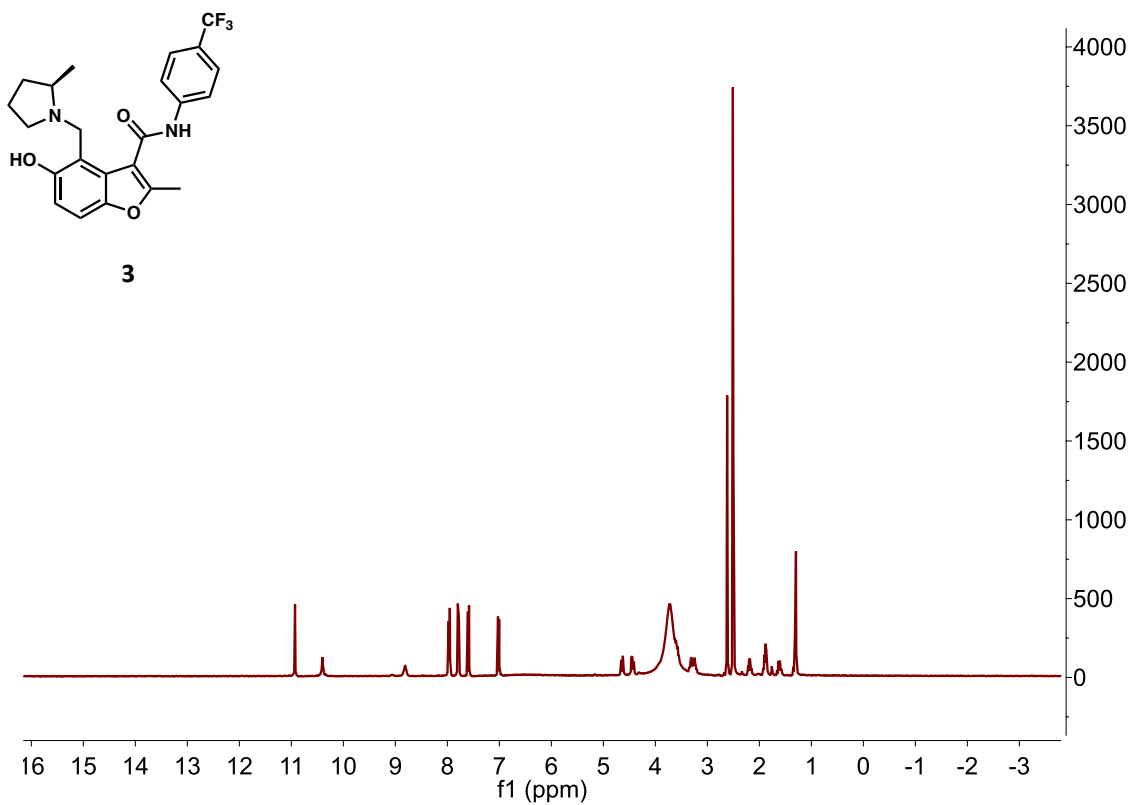

Supplementary Figure 16: <sup>1</sup>H NMR of 3

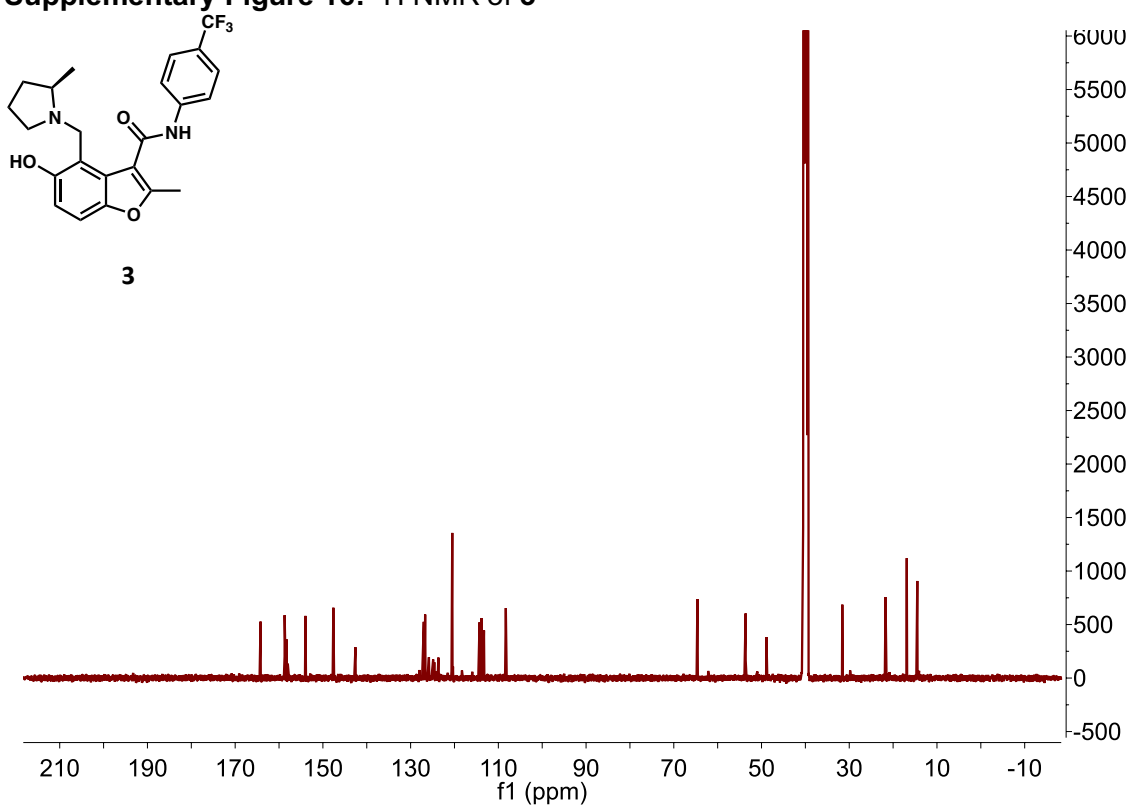

Supplementary Figure 17: <sup>13</sup>C NMR of 3

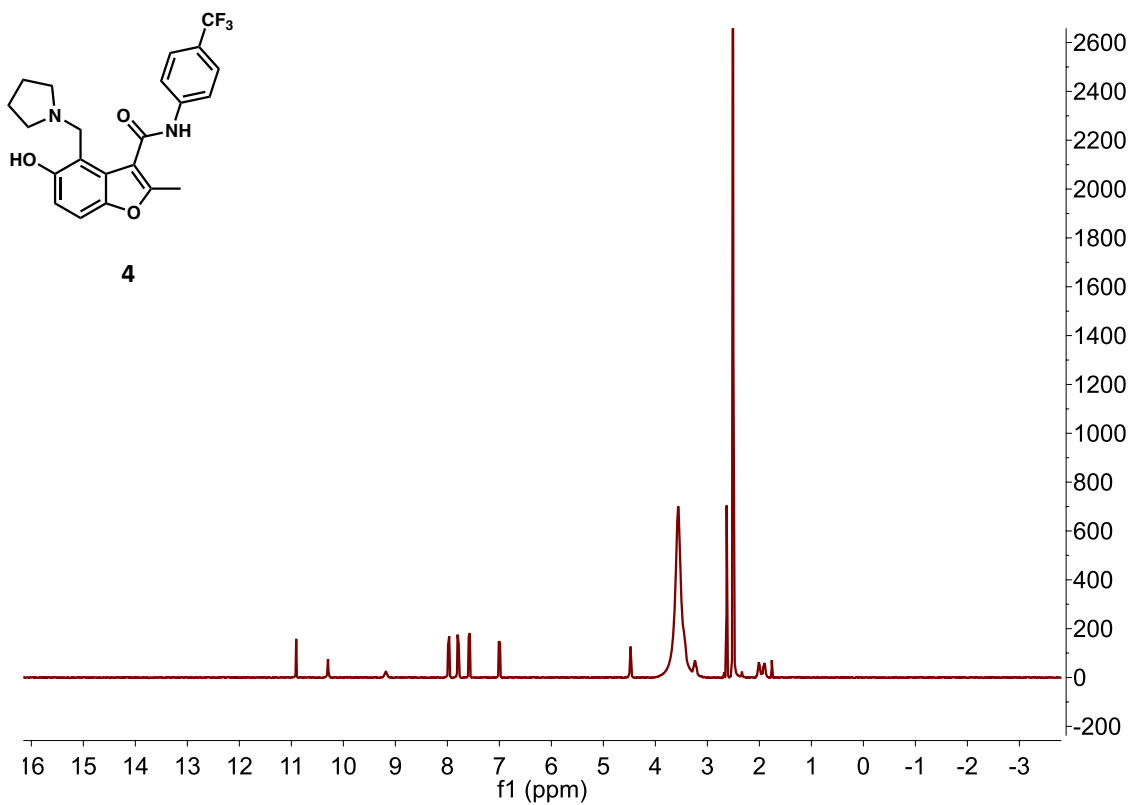

Supplementary Figure 18: <sup>1</sup>H NMR of 4

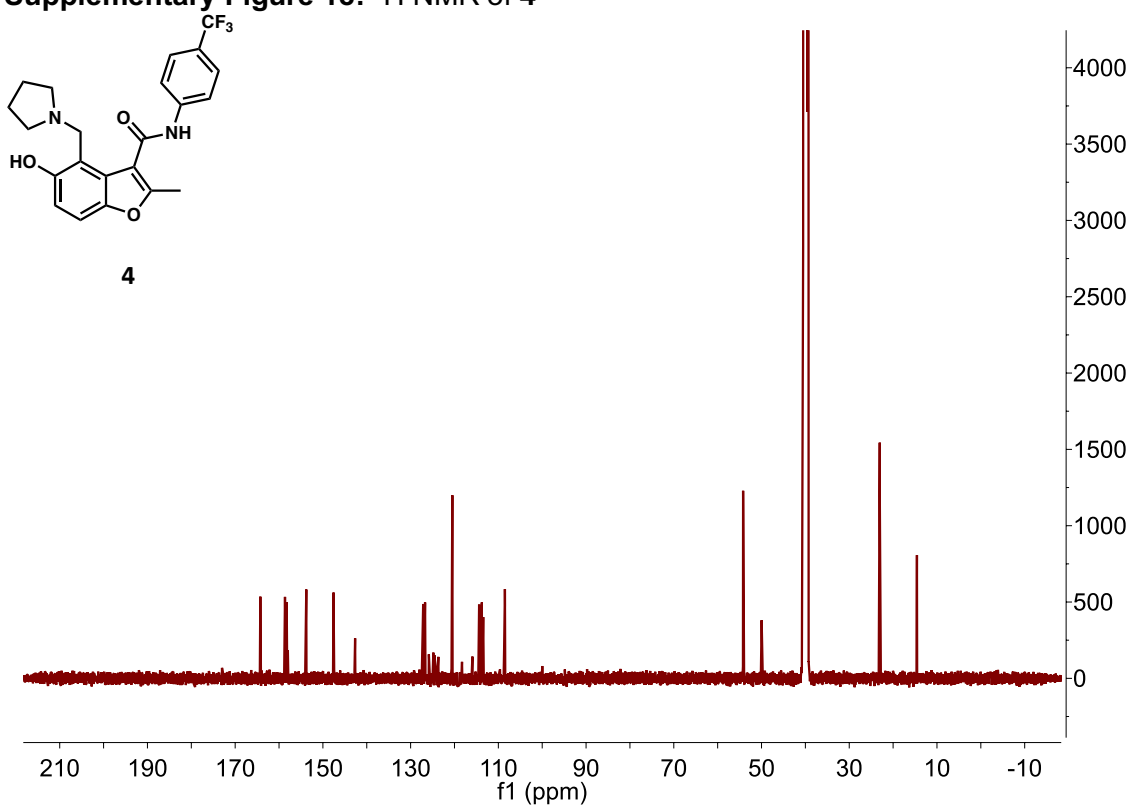

Supplementary Figure 19: <sup>13</sup>C NMR of 4

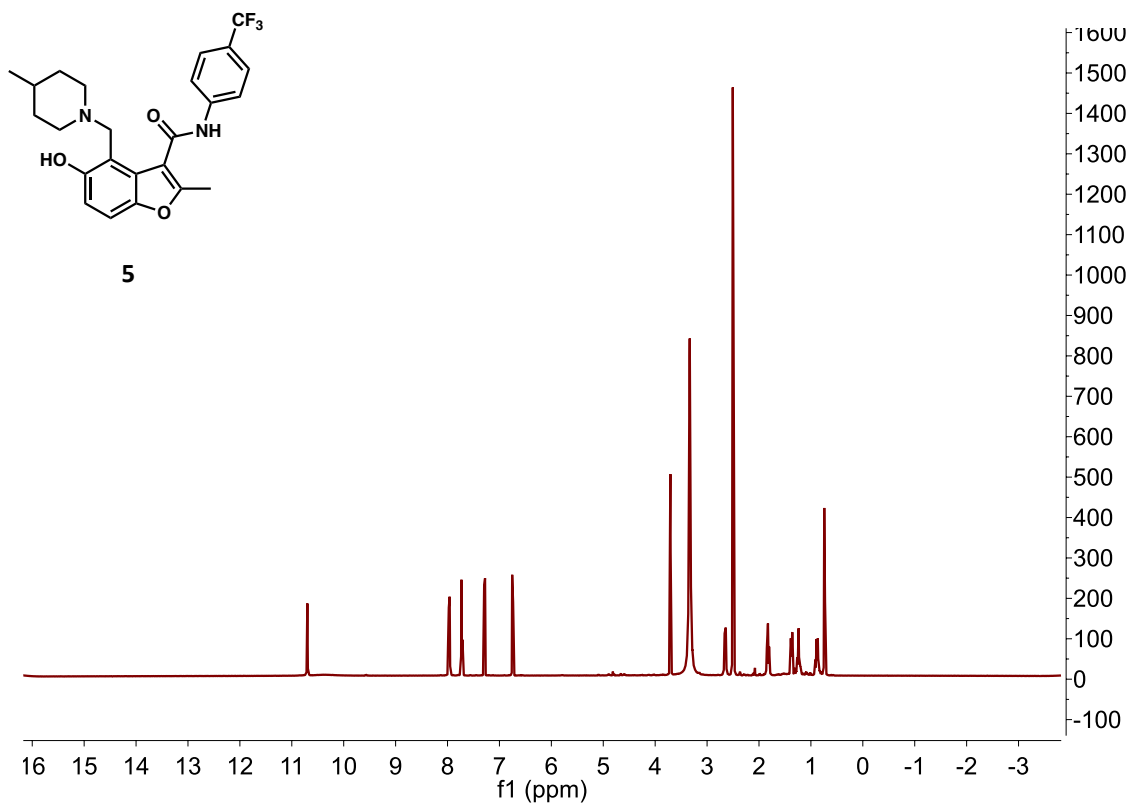

Supplementary Figure 20: <sup>1</sup>H NMR of 5

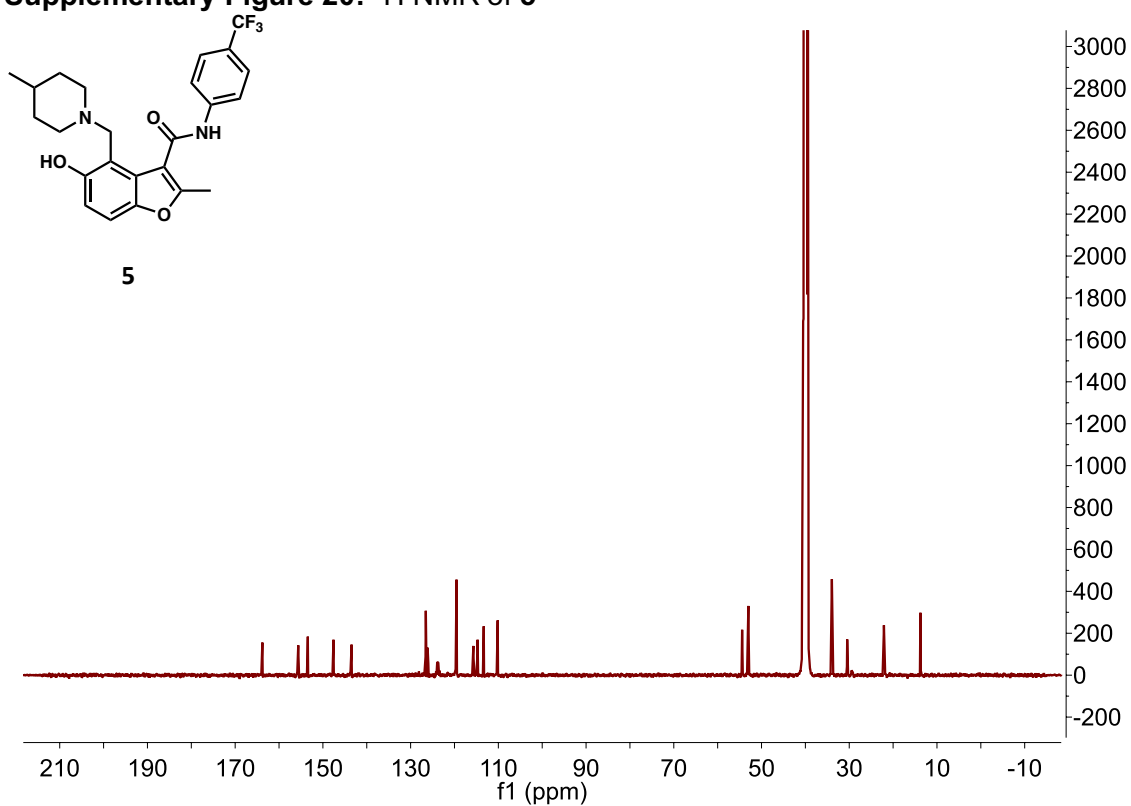

Supplementary Figure 21: <sup>13</sup>C NMR of 5

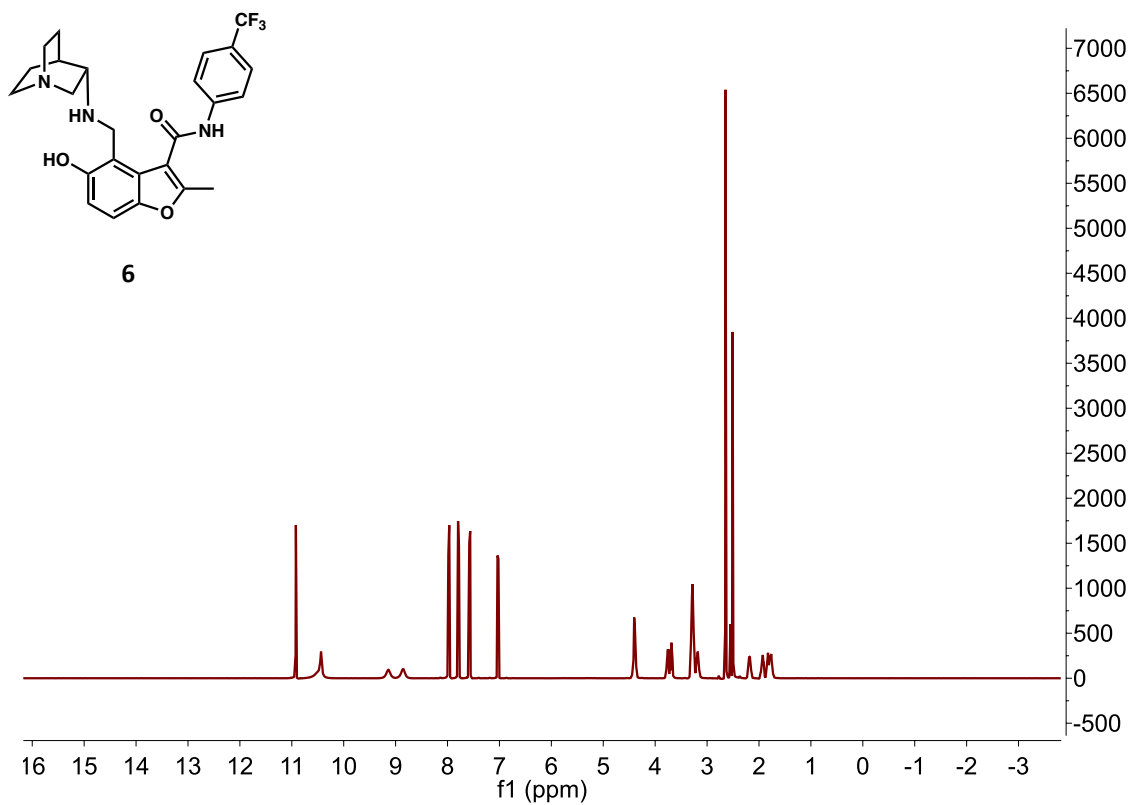

**Supplementary Figure 22: <sup>1</sup>H NMR of 6**

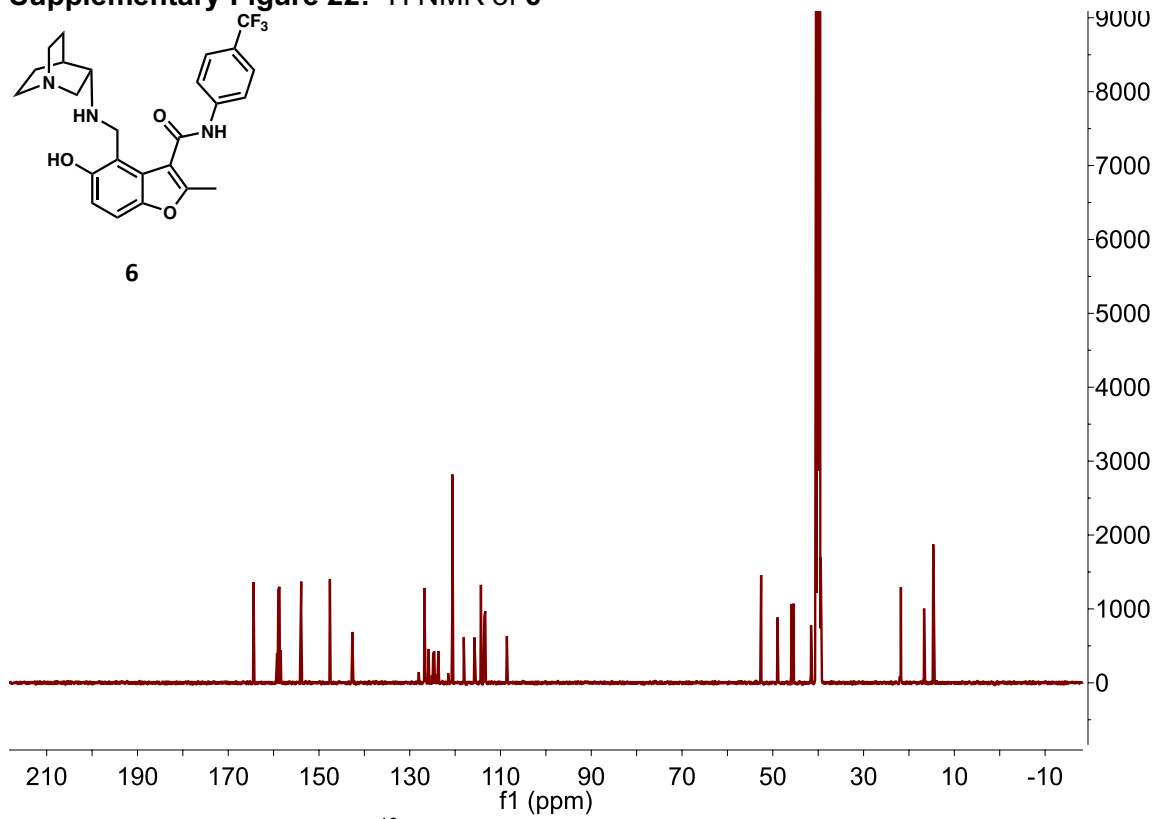

**Supplementary Figure 23: <sup>13</sup>C NMR of 6**

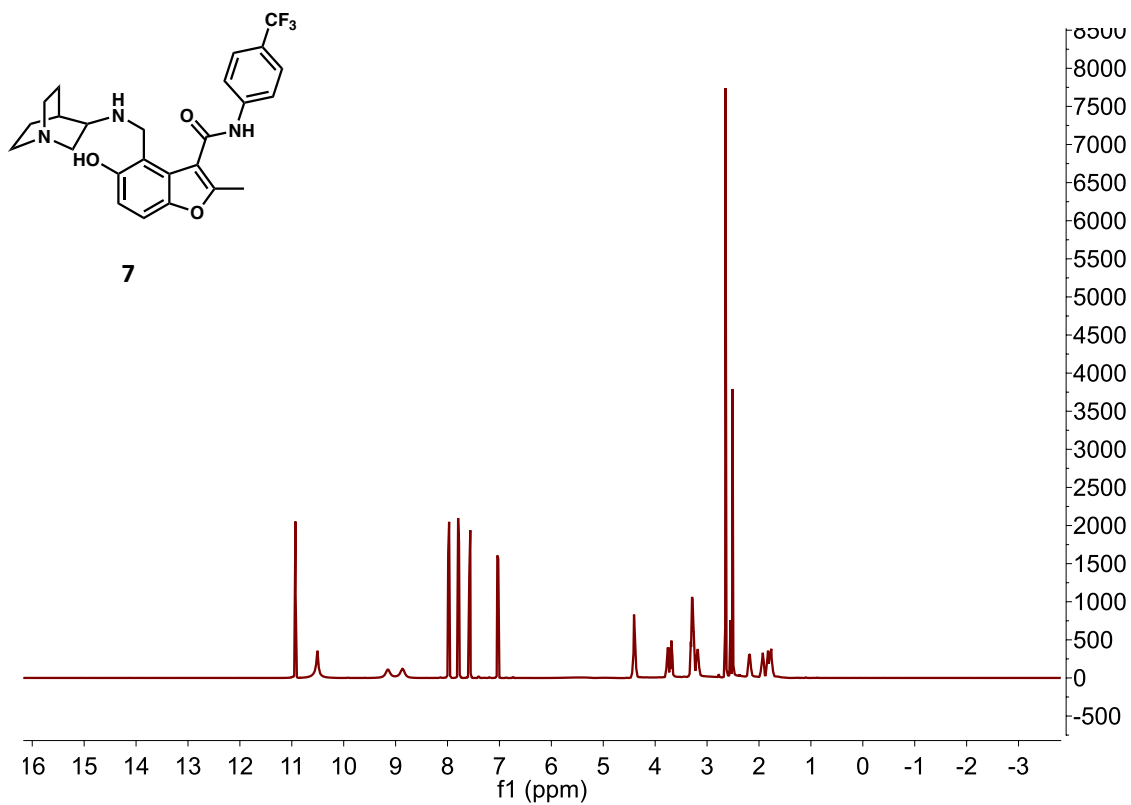

**Supplementary Figure 24:**  $^1\text{H}$  NMR of **7**

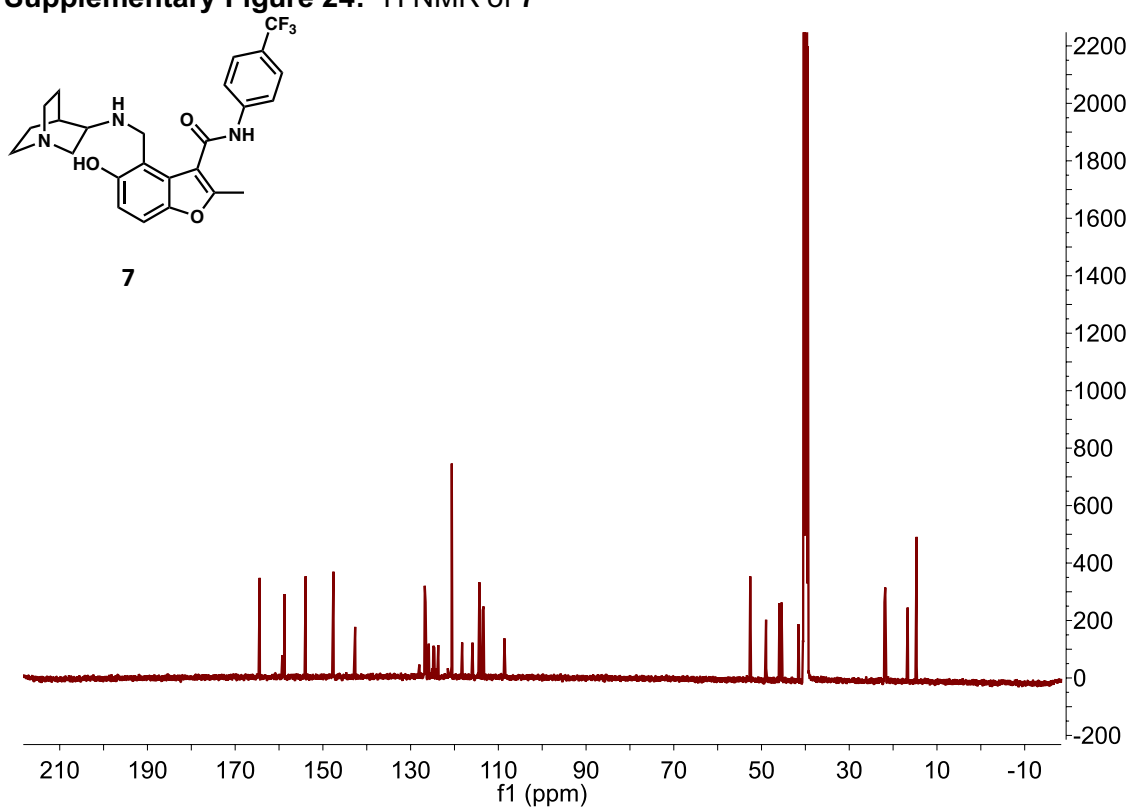

**Supplementary Figure 25:**  $^{13}\text{C}$  NMR of **7**

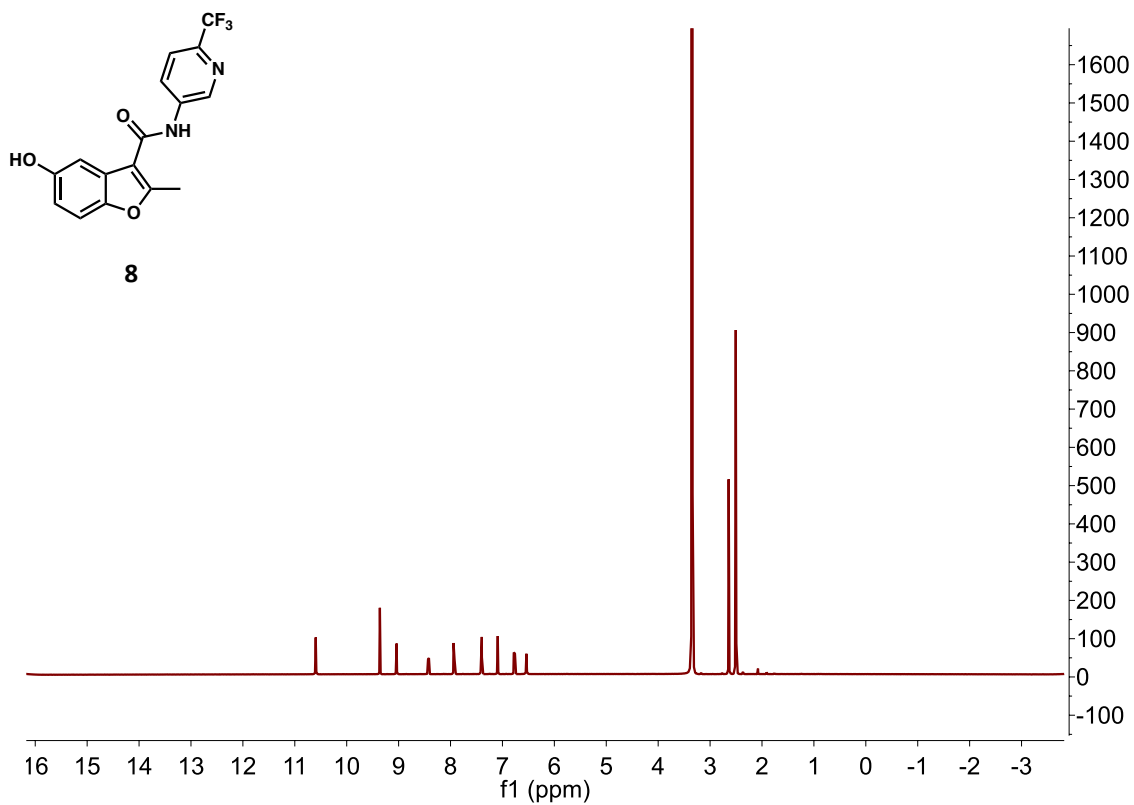

Supplementary Figure 26: <sup>1</sup>H NMR of 8

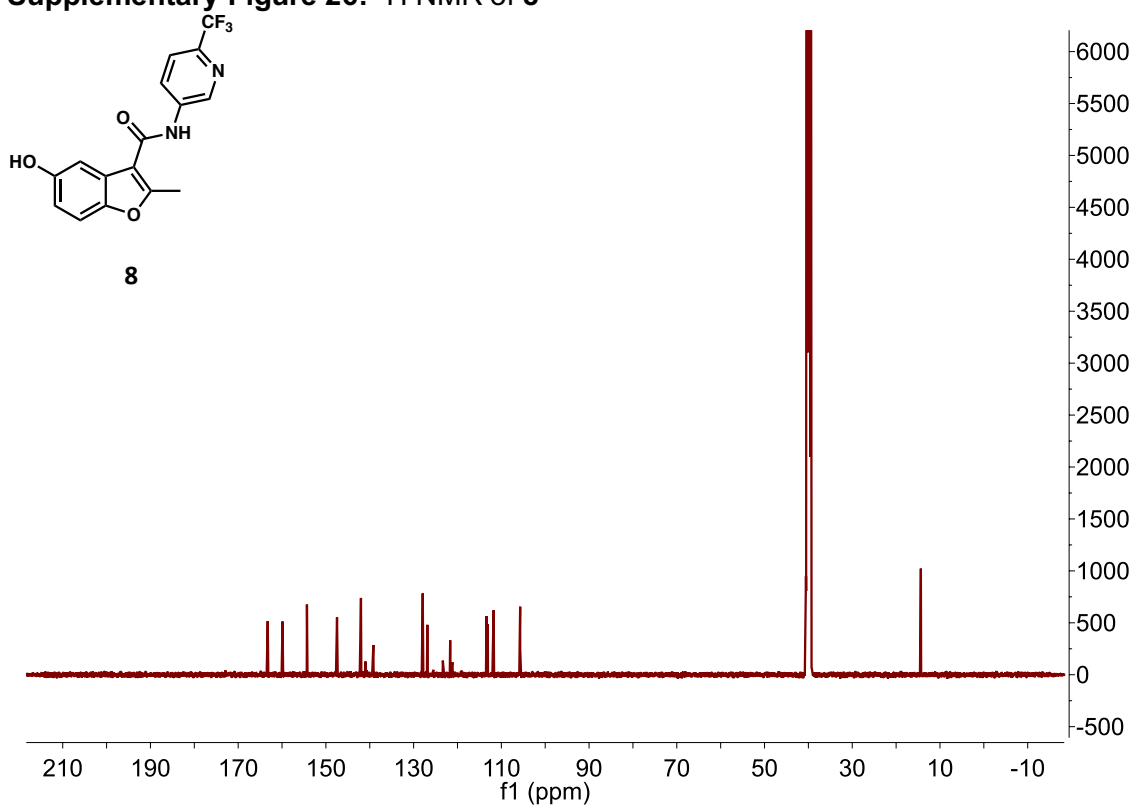

Supplementary Figure 27: <sup>13</sup>C NMR of 8

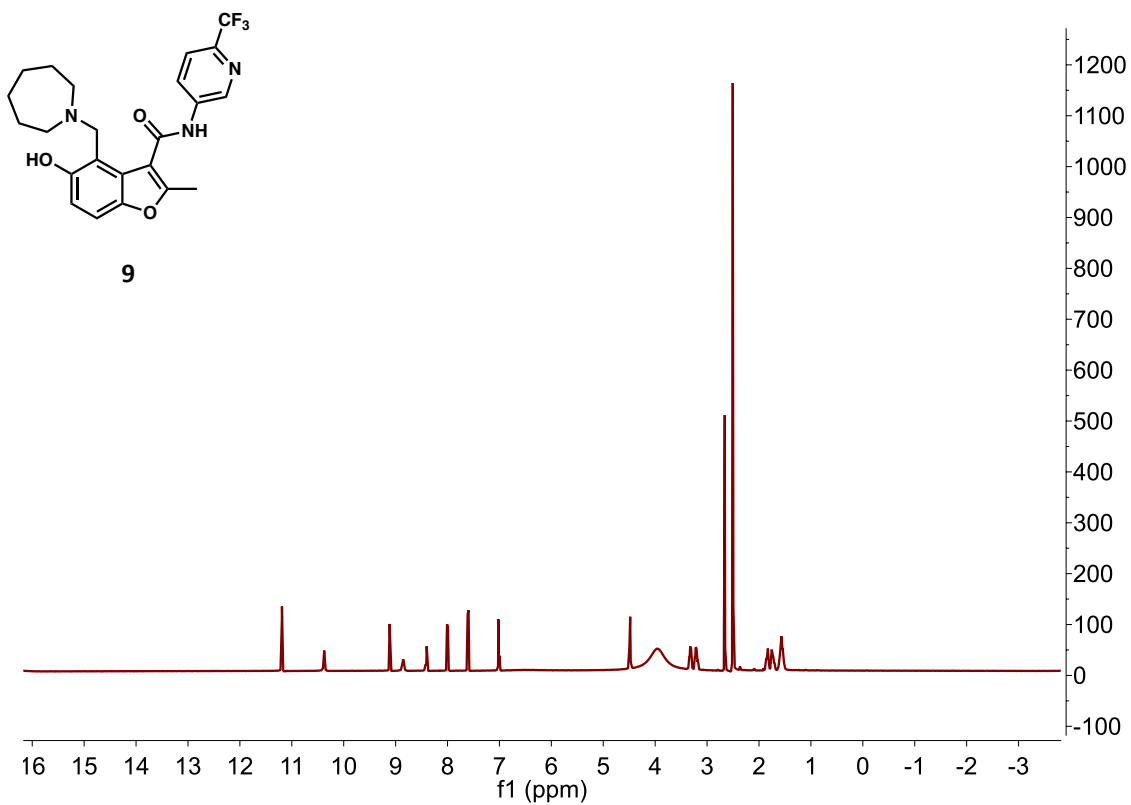

Supplementary Figure 28: <sup>1</sup>H NMR of 9

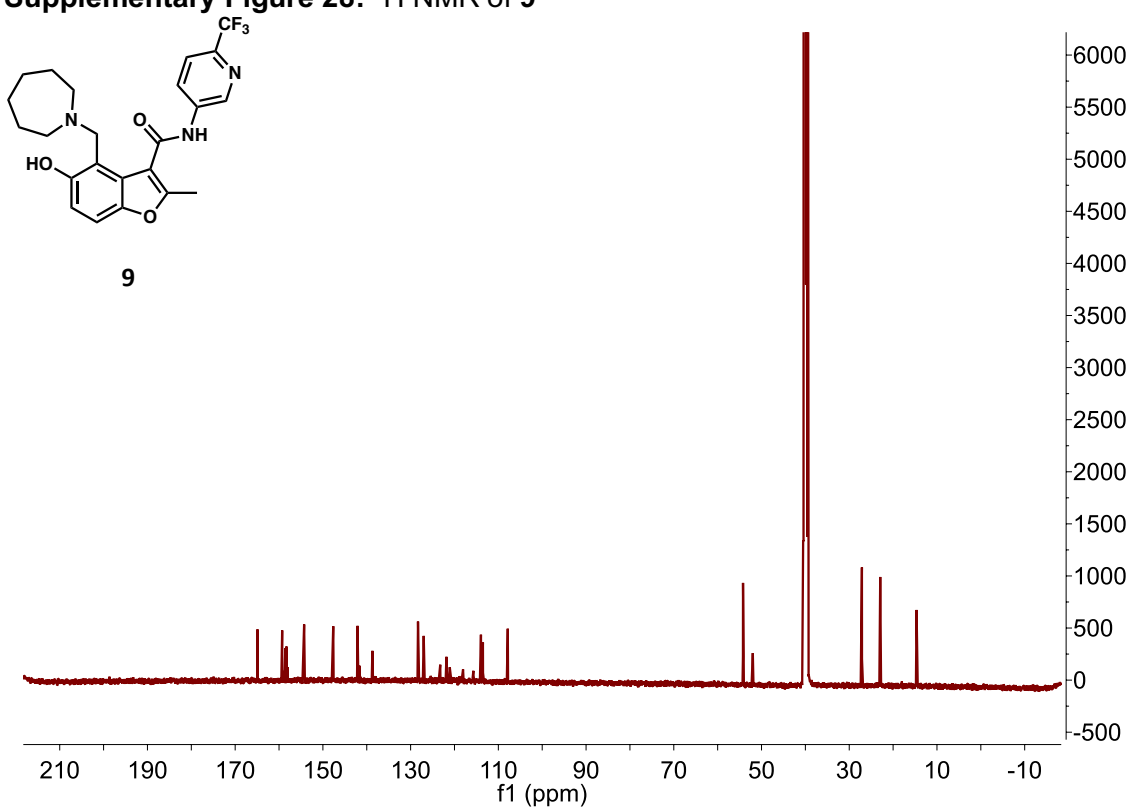

Supplementary Figure 29: <sup>13</sup>C NMR of 9

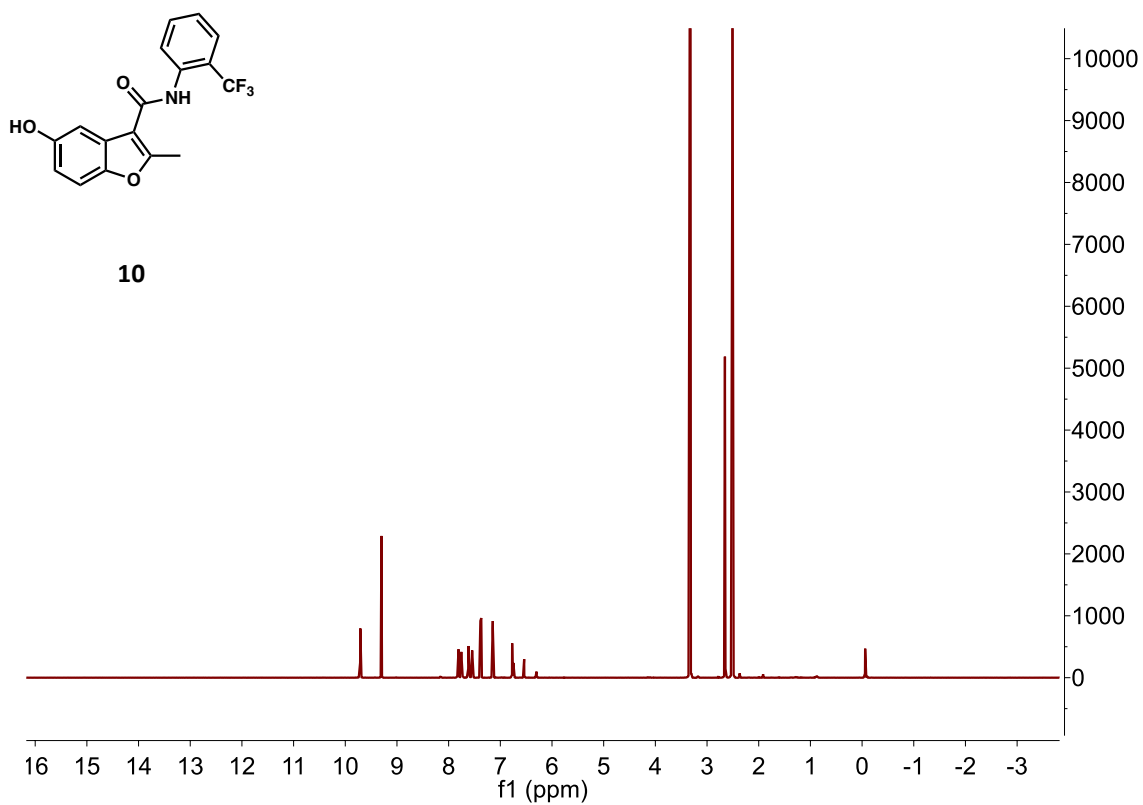

**Supplementary Figure 30: <sup>1</sup>H NMR of 10**

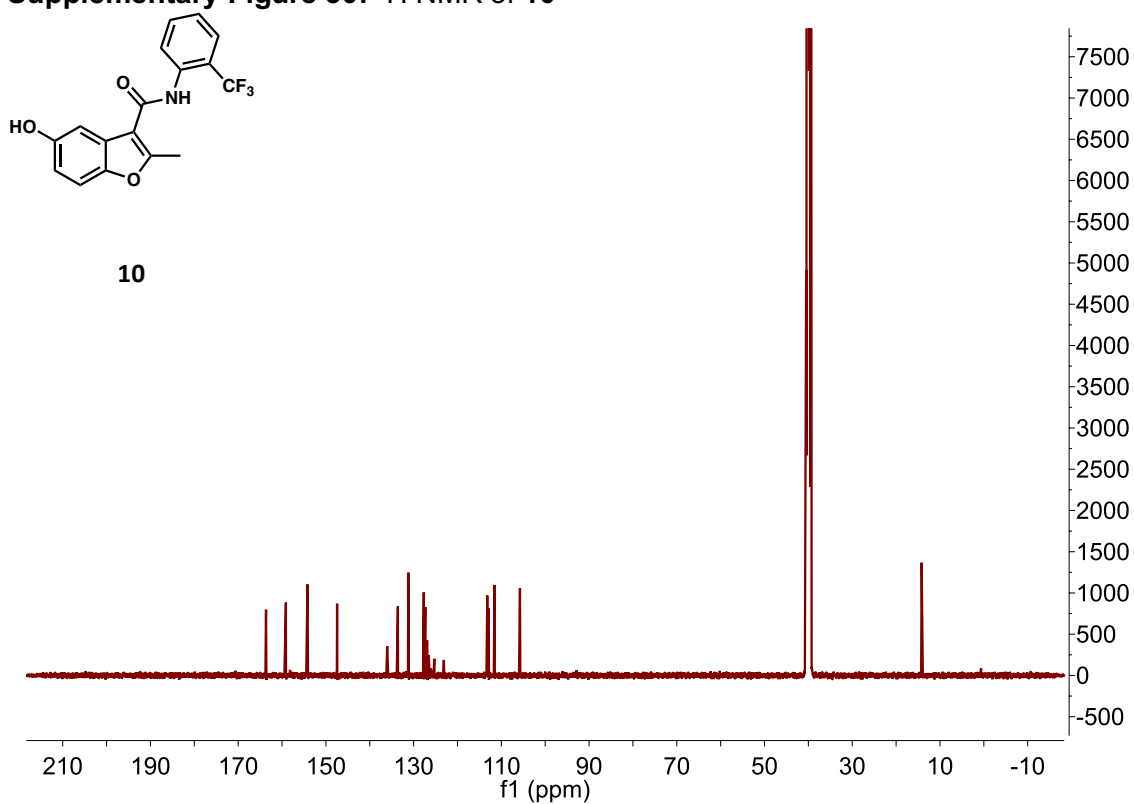

**Supplementary Figure 31: <sup>13</sup>C NMR of 10**



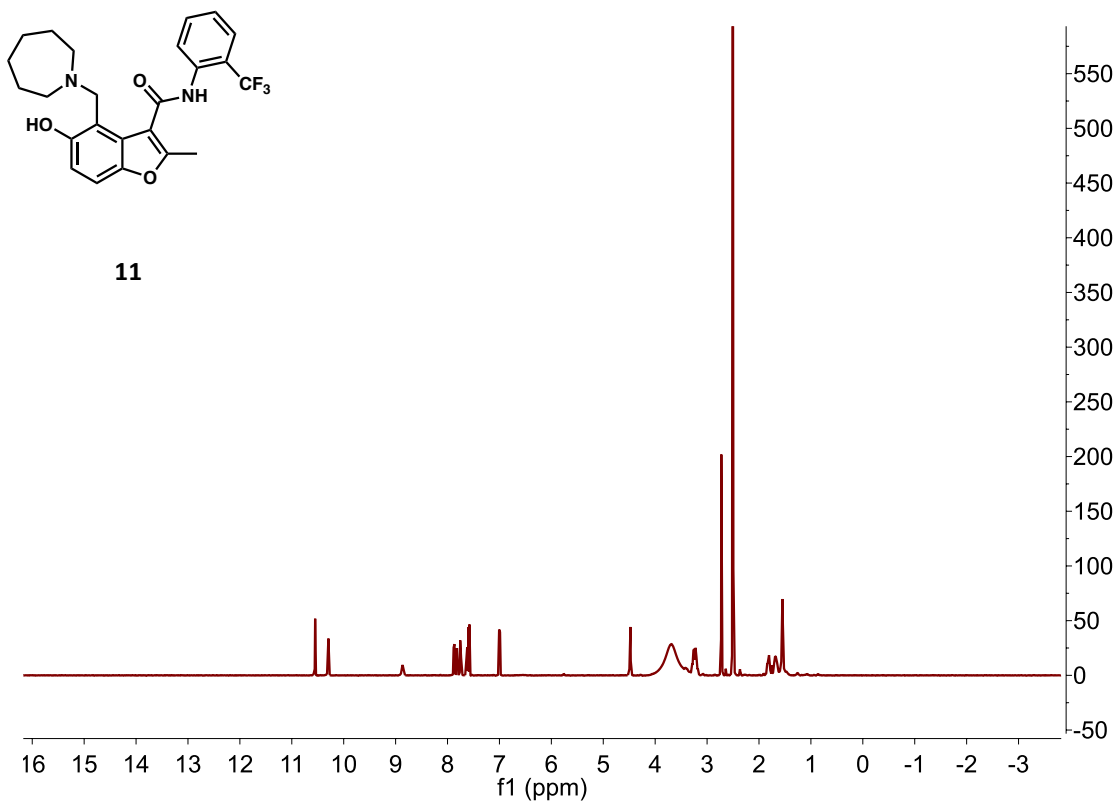

**Supplementary Figure 32: <sup>1</sup>H NMR of 11**

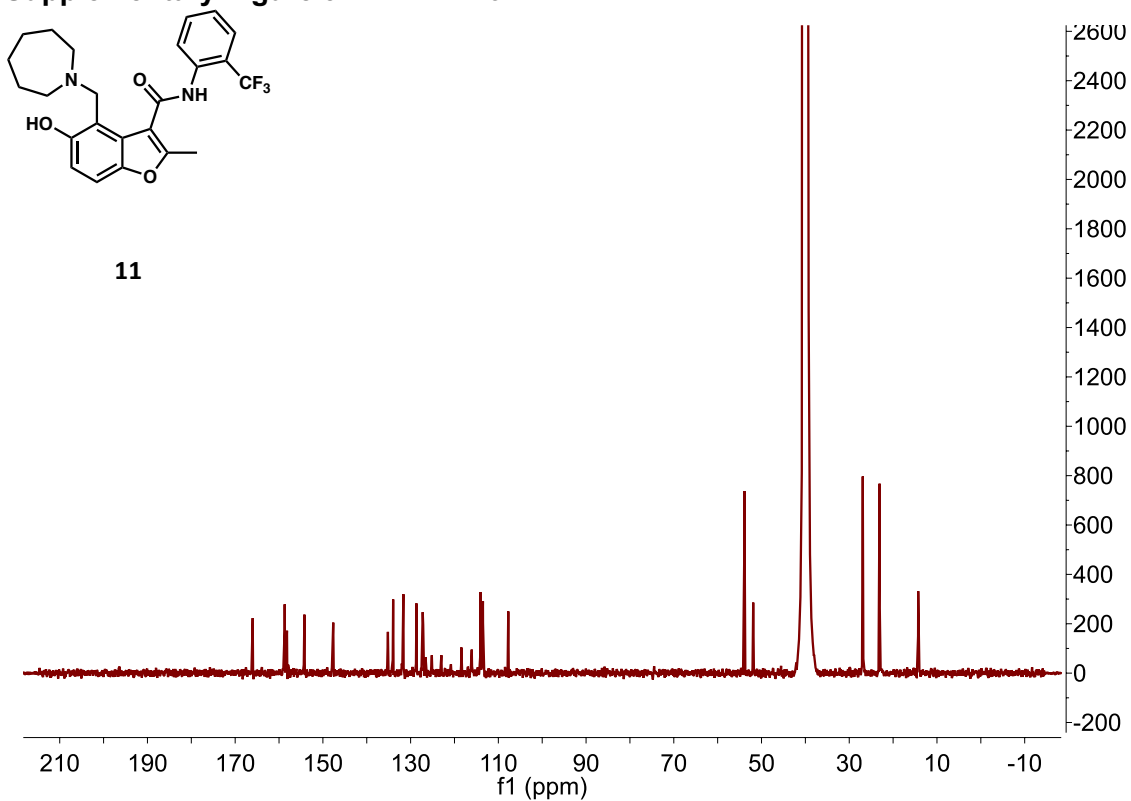

**Supplementary Figure 33: <sup>13</sup>C NMR of 11**

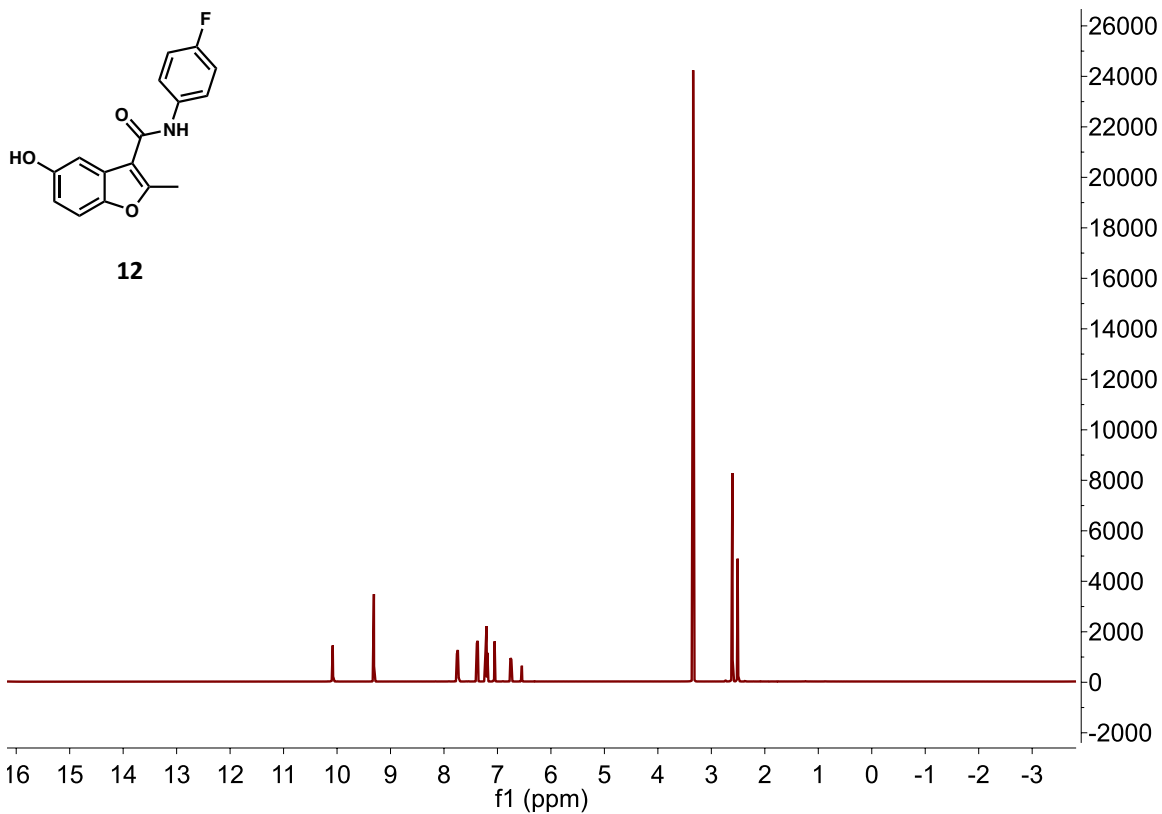

**Supplementary Figure 34: <sup>1</sup>H NMR of 12**

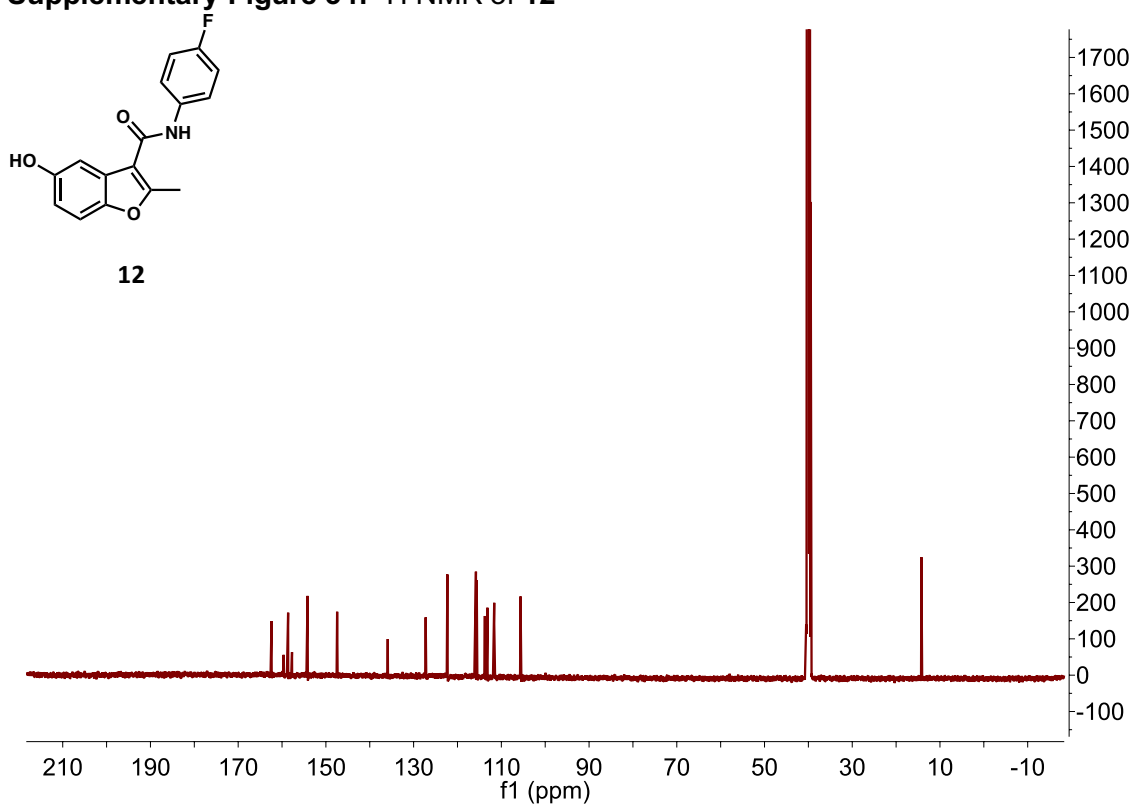

**Supplementary Figure 35: <sup>13</sup>C NMR of 12**

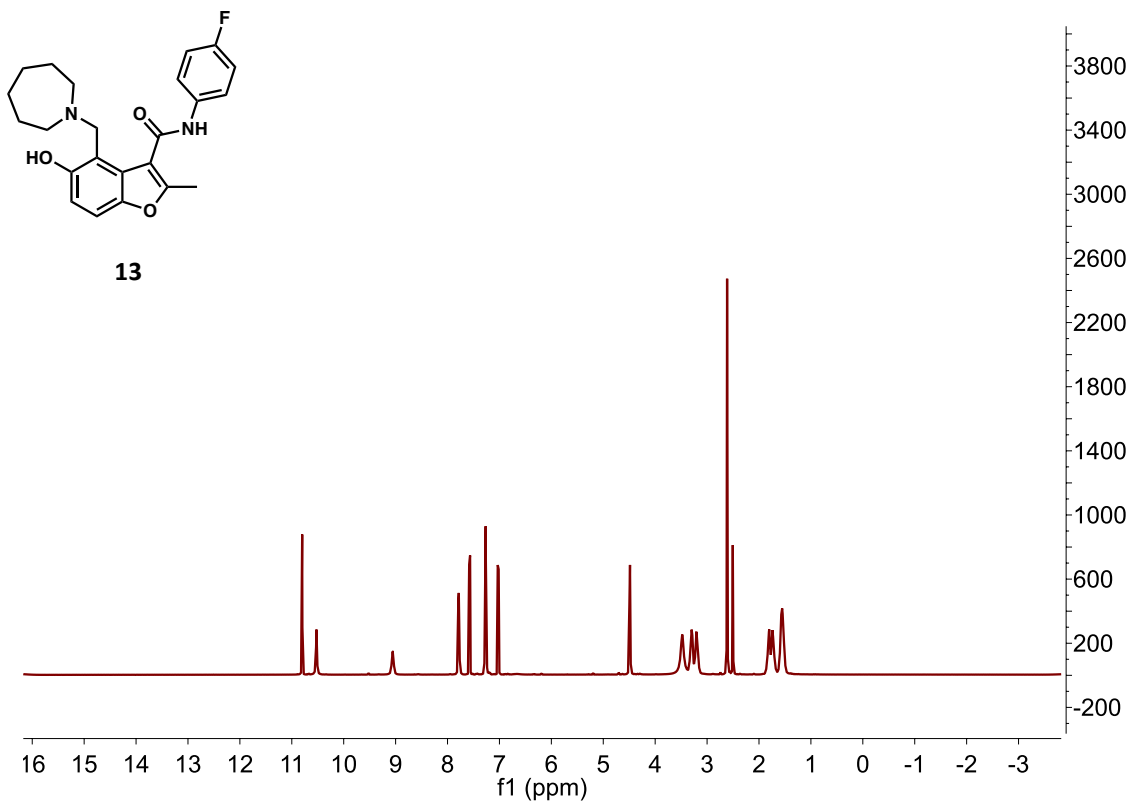

**Supplementary Figure 36:  $^1\text{H}$  NMR of 13**

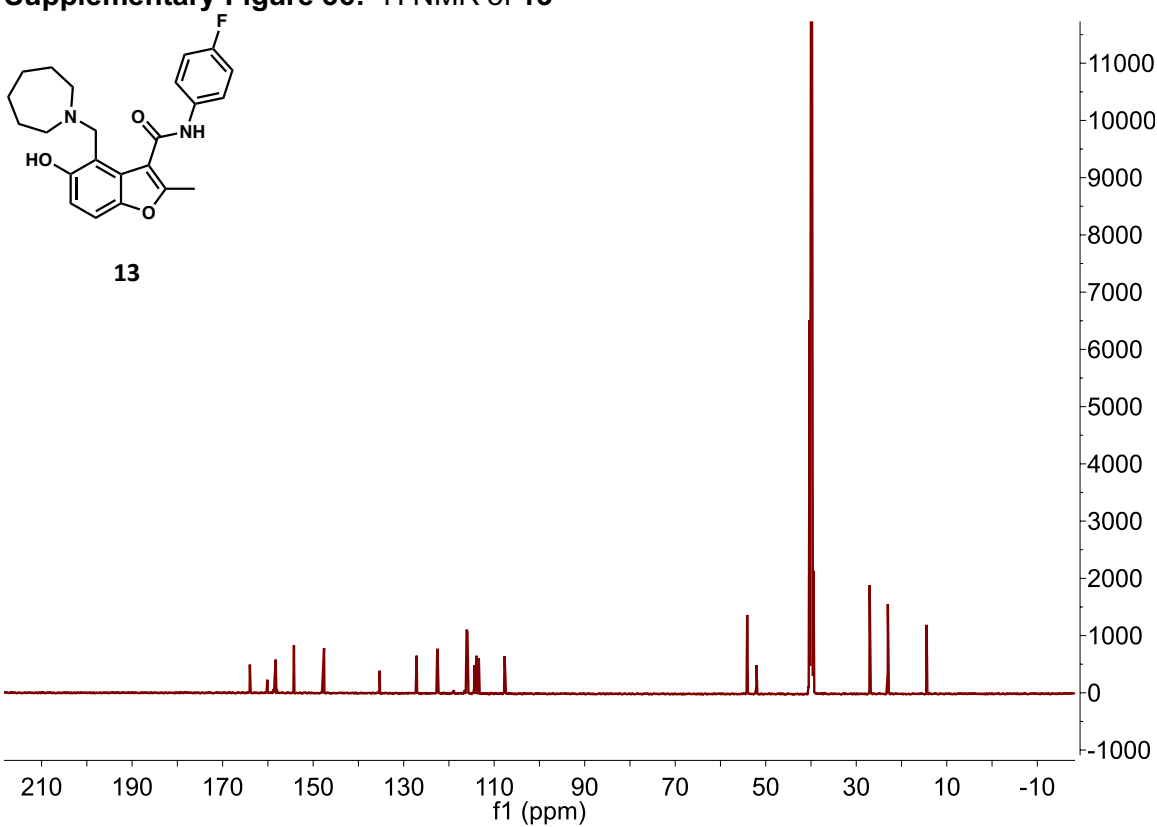

**Supplementary Figure 37:  $^{13}\text{C}$  NMR of 13**

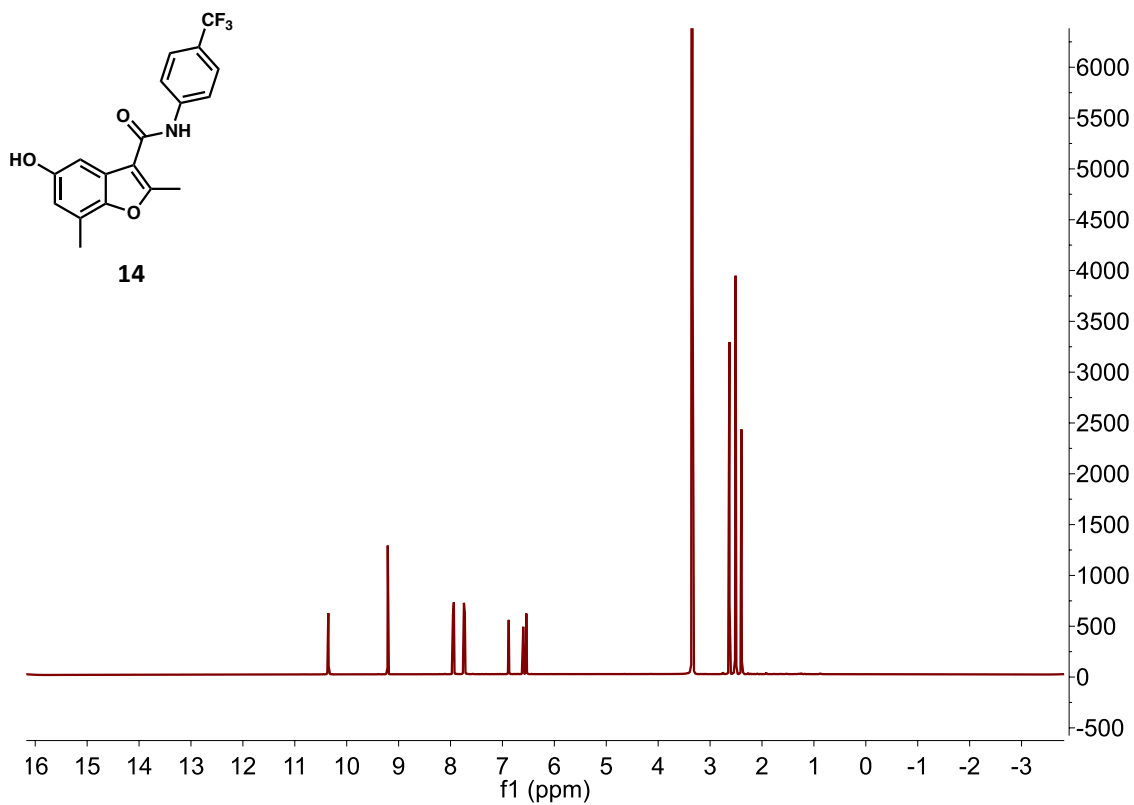

Supplementary Figure 38: <sup>1</sup>H NMR of **14**

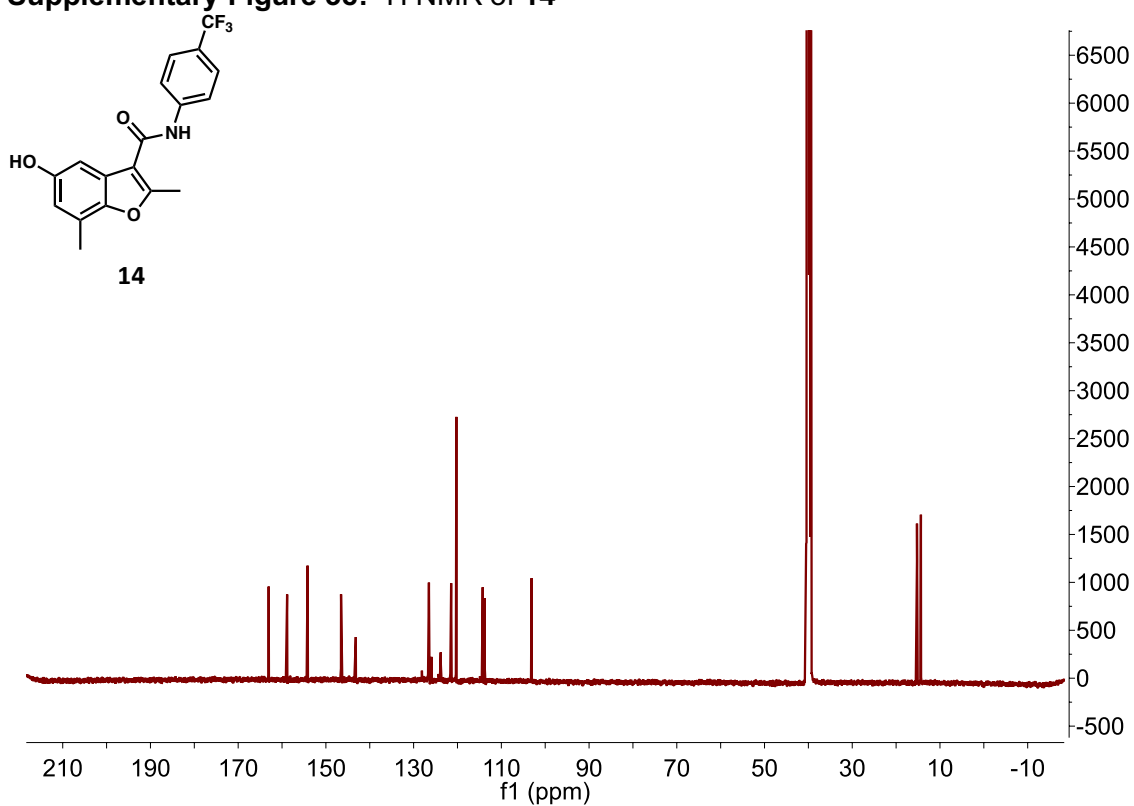

Supplementary Figure 39: <sup>13</sup>C NMR of **14**

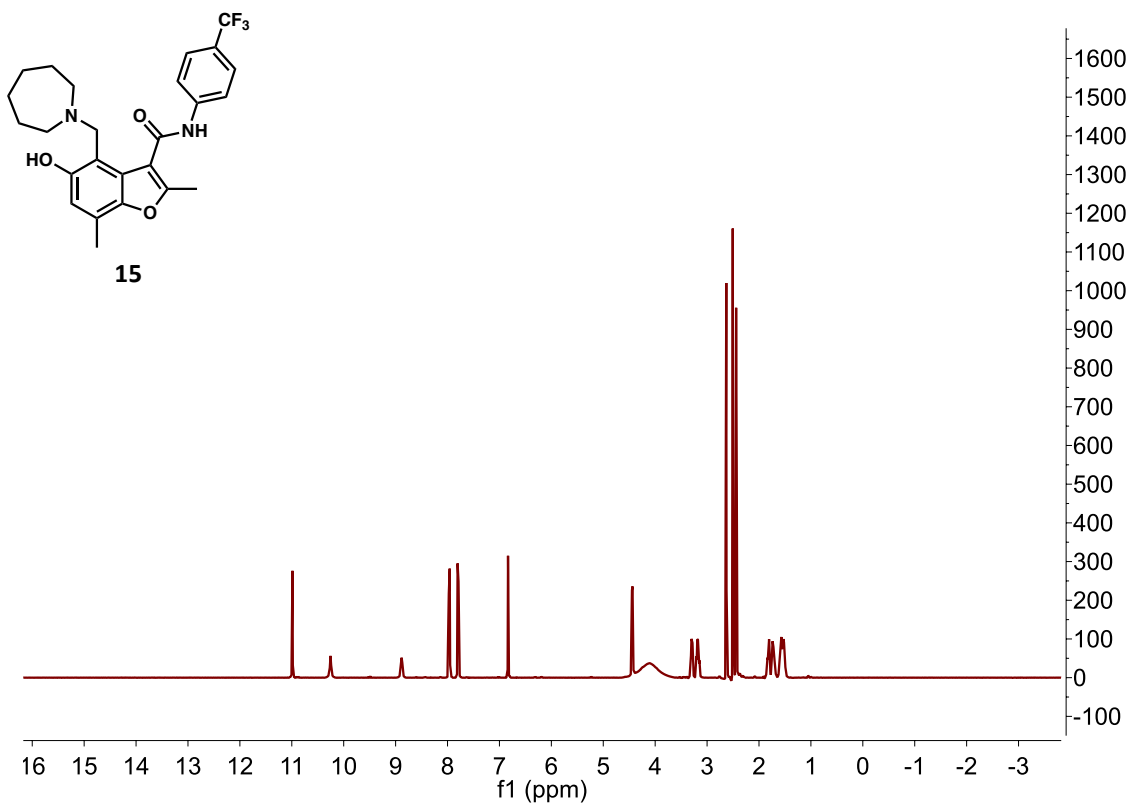

**Supplementary Figure 40:  $^1\text{H}$  NMR of 15**

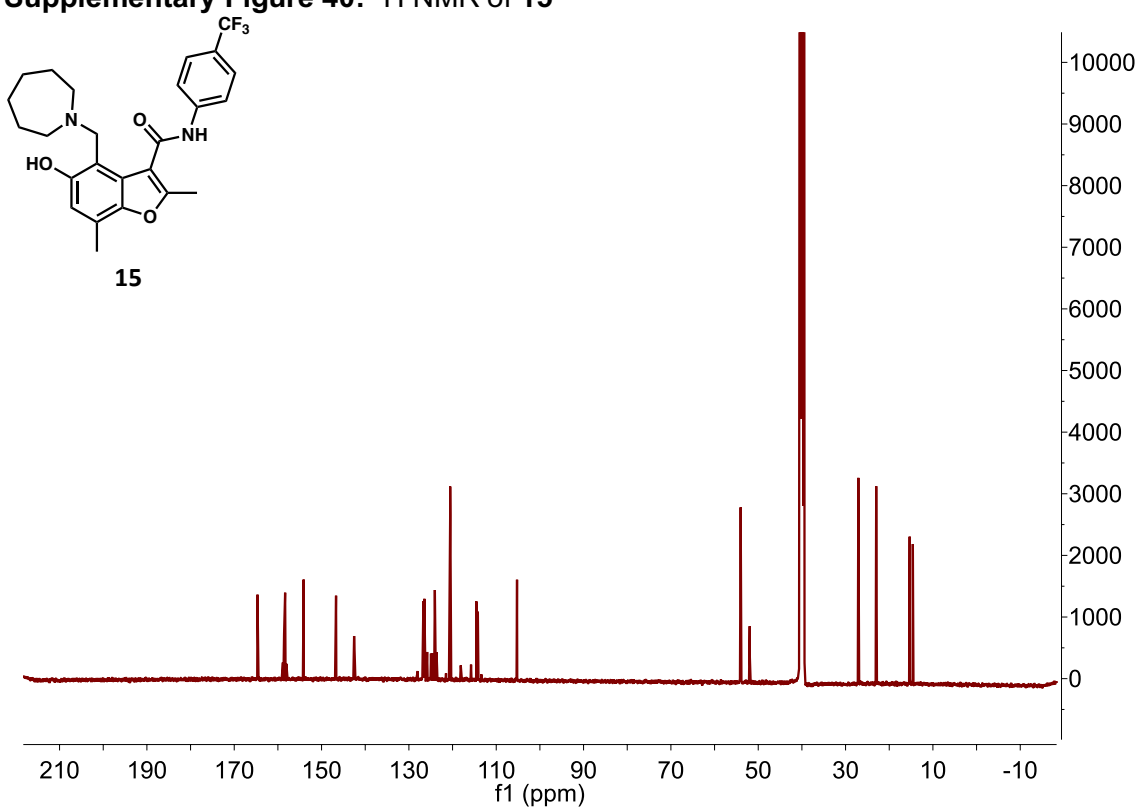

**Supplementary Figure 41:  $^{13}\text{C}$  NMR of 15**

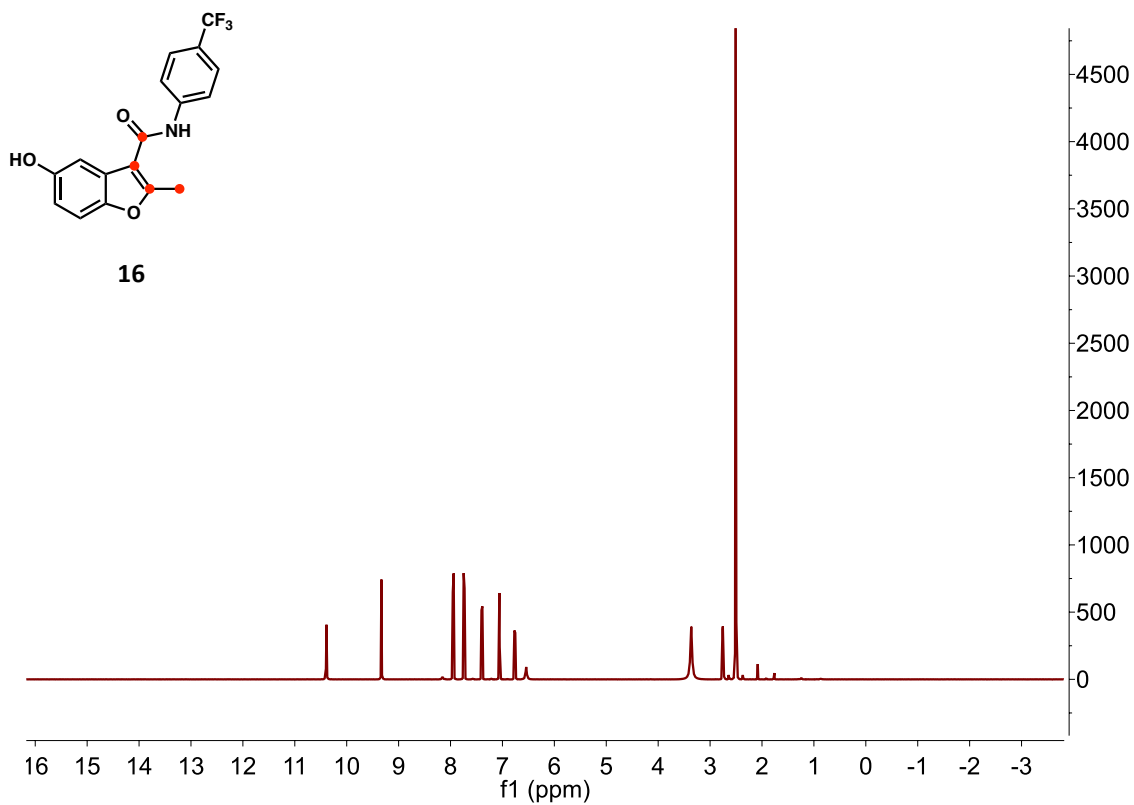

**Supplementary Figure 42: <sup>1</sup>H NMR of 16**

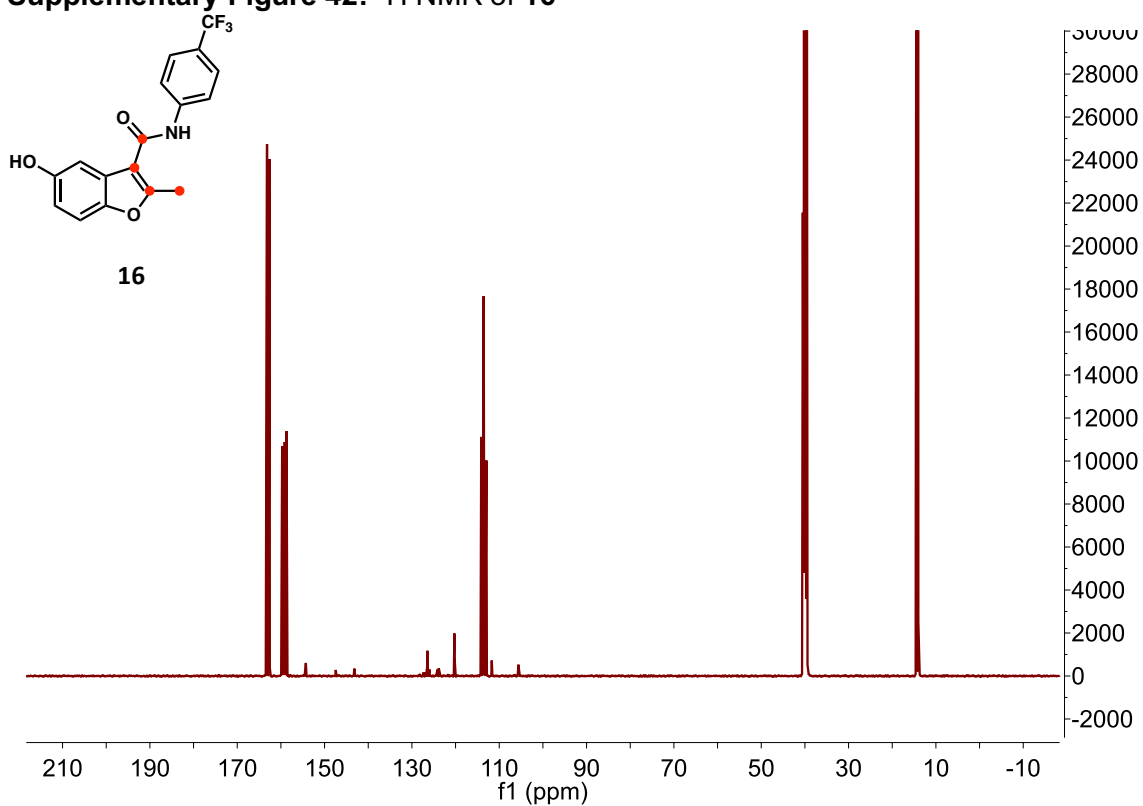

**Supplementary Figure 43: <sup>13</sup>C NMR of 16**

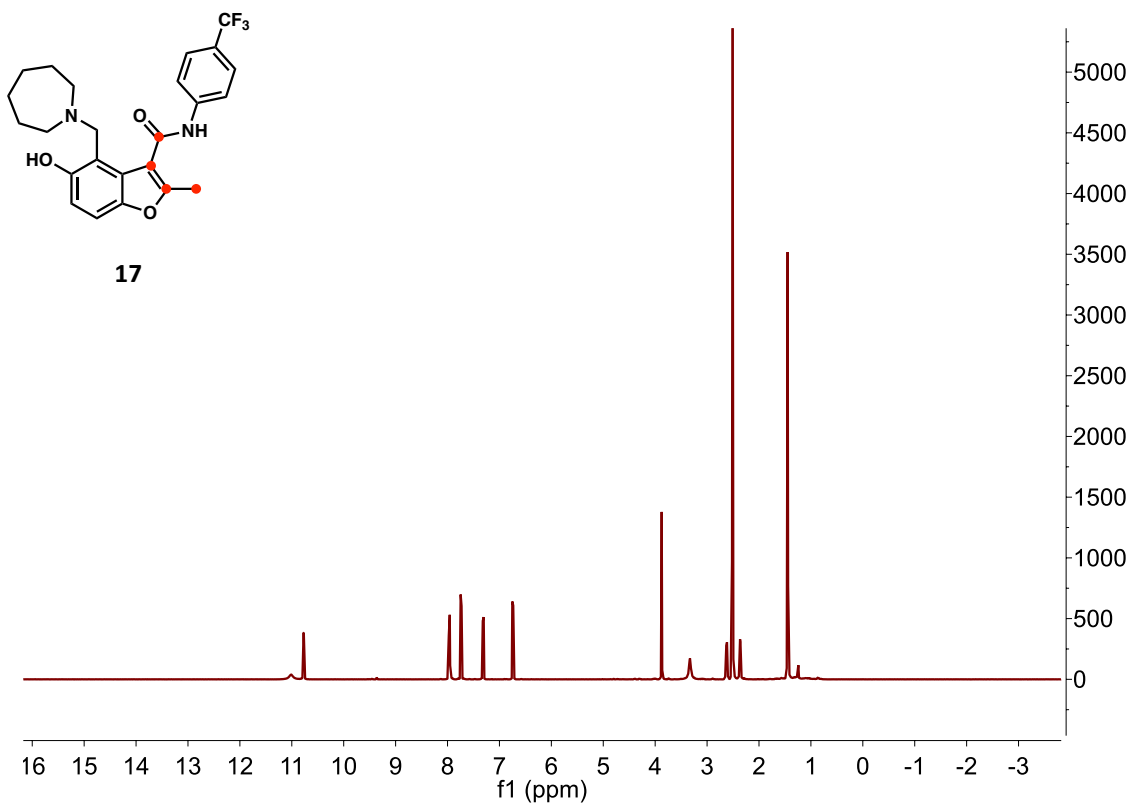

**Supplementary Figure 44: <sup>1</sup>H NMR of 17**

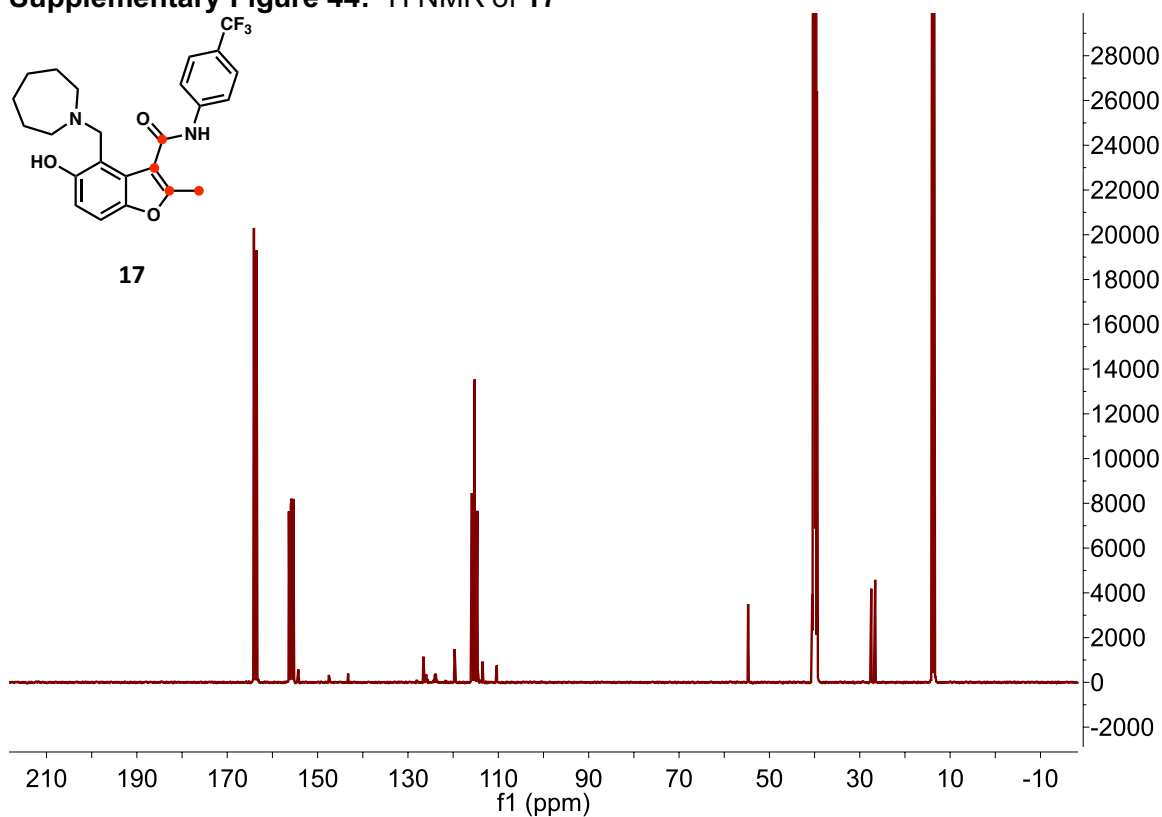

**Supplementary Figure 45: <sup>13</sup>C NMR of 17**

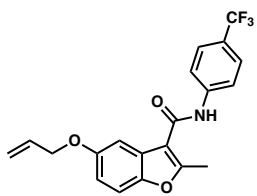

18

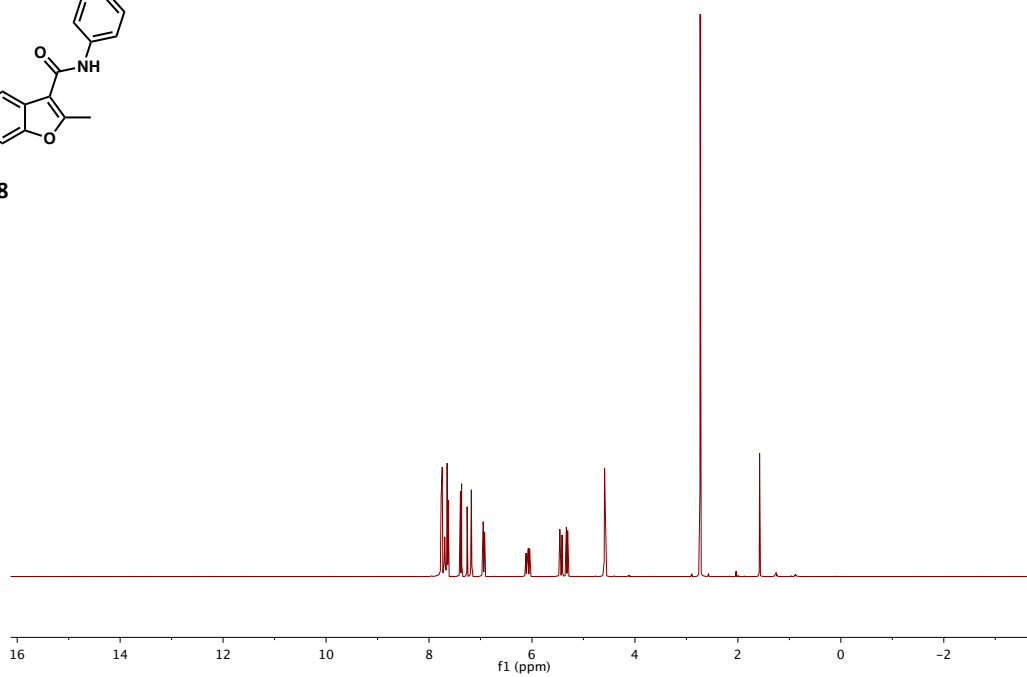

Supplementary Figure 46:  $^1\text{H}$  NMR of 18

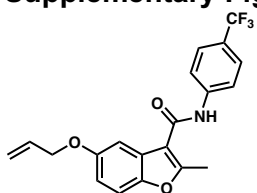

18

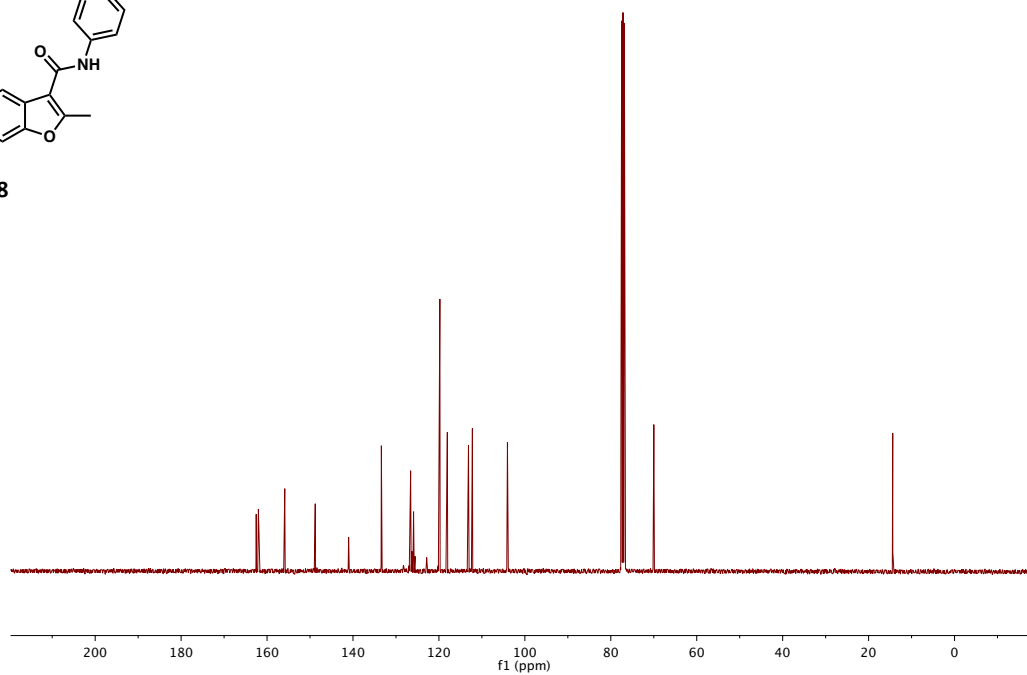

Supplementary Figure 47:  $^{13}\text{C}$  NMR of 18



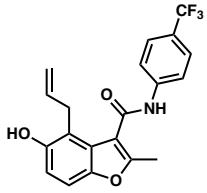

19

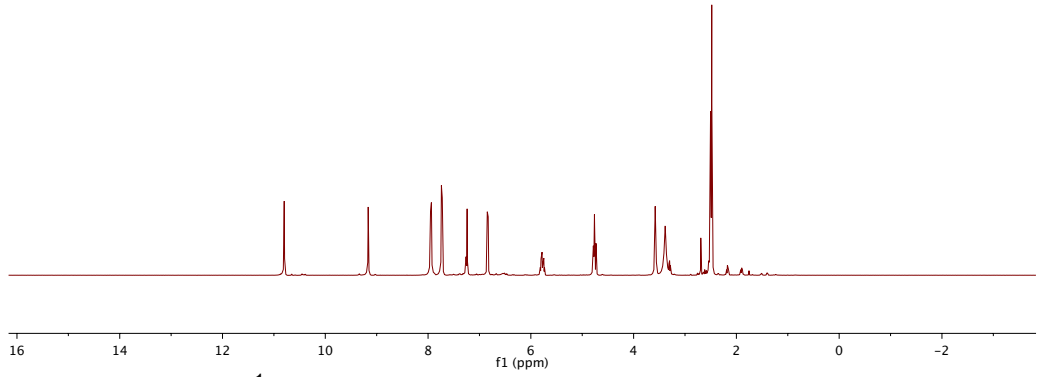

Supplementary Figure 48: <sup>1</sup>H NMR of 19

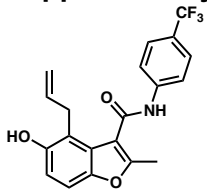

19

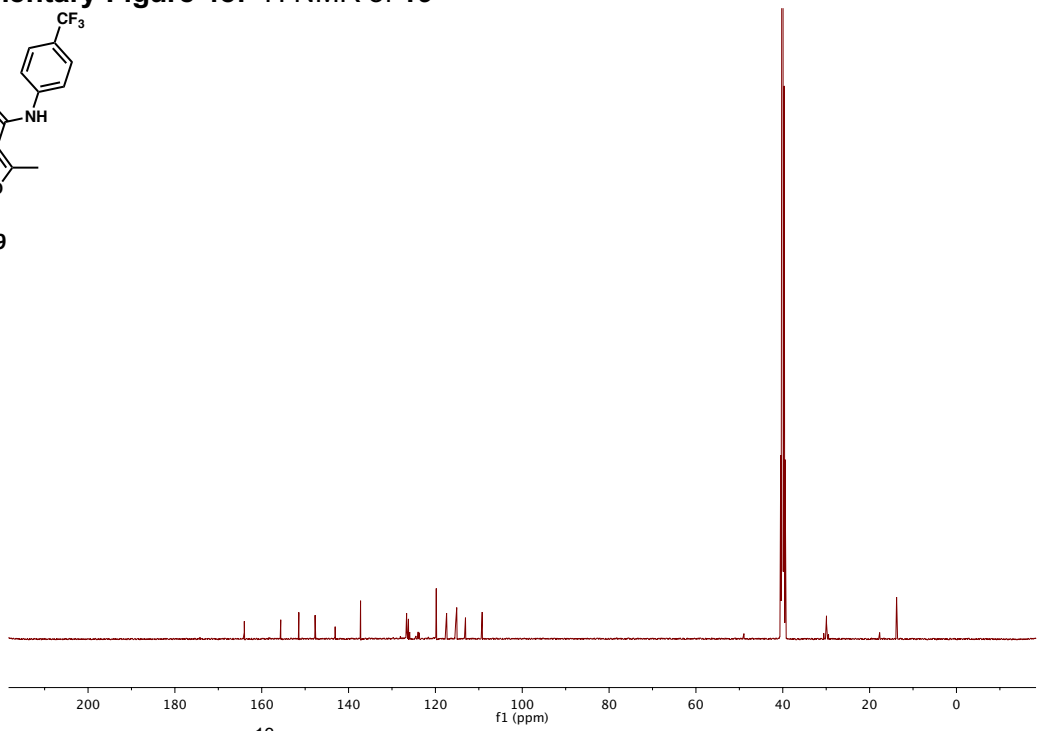

Supplementary Figure 49: <sup>13</sup>C NMR of 19

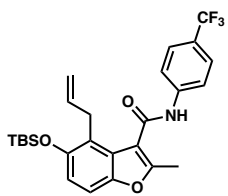

20

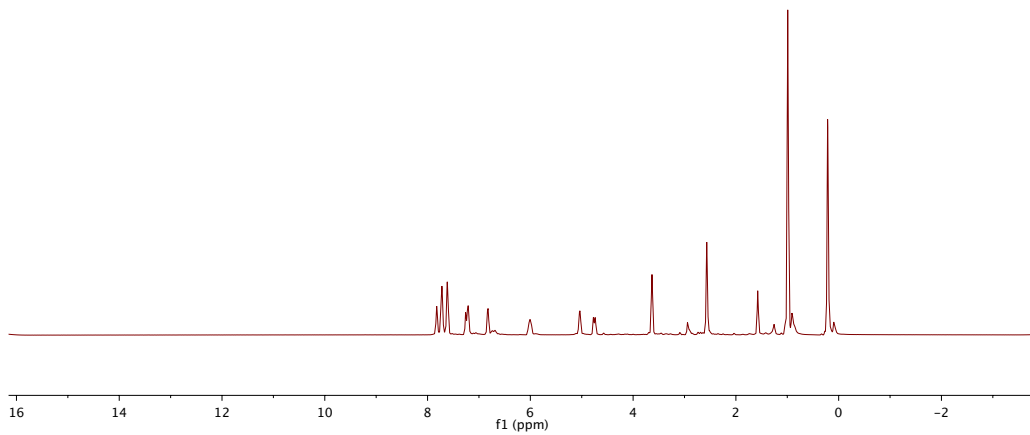

Supplementary Figure 50: <sup>1</sup>H NMR of 20

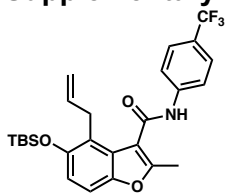

20

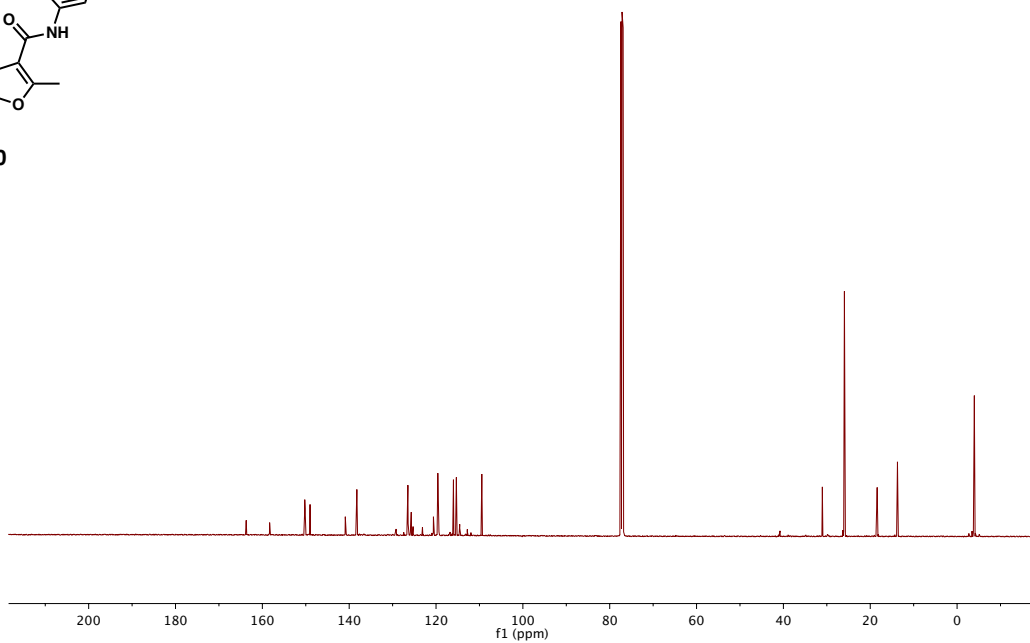

Supplementary Figure 51: <sup>13</sup>C NMR of 20

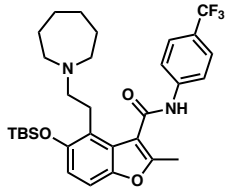

21

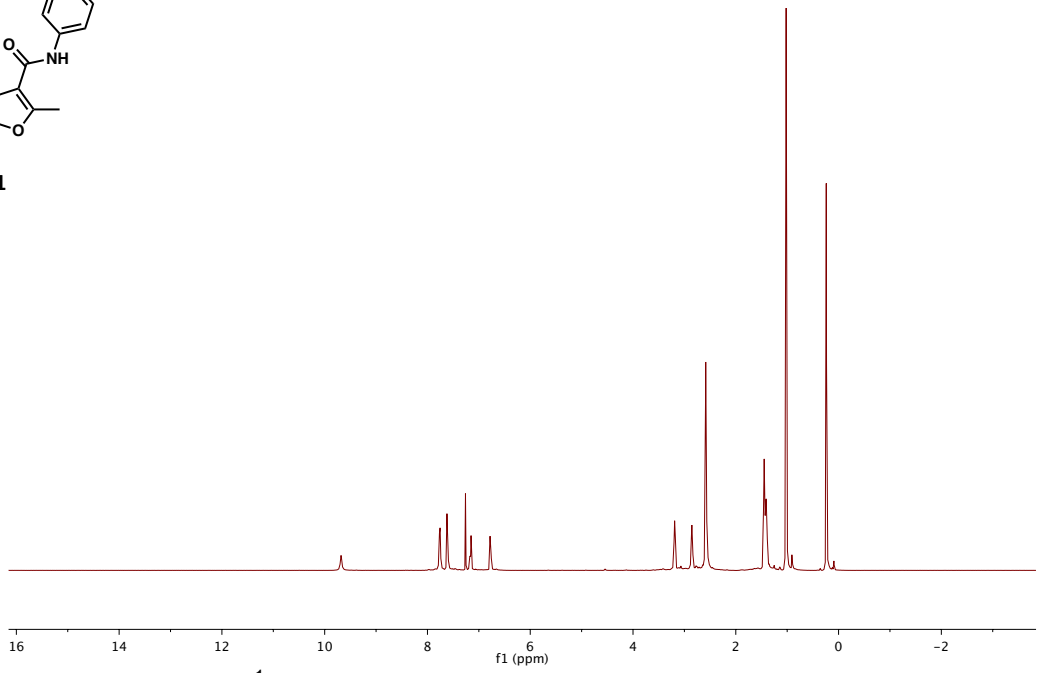

Supplementary Figure 52: <sup>1</sup>H NMR of 21

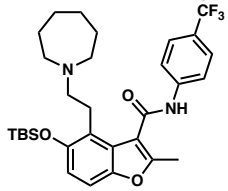

21

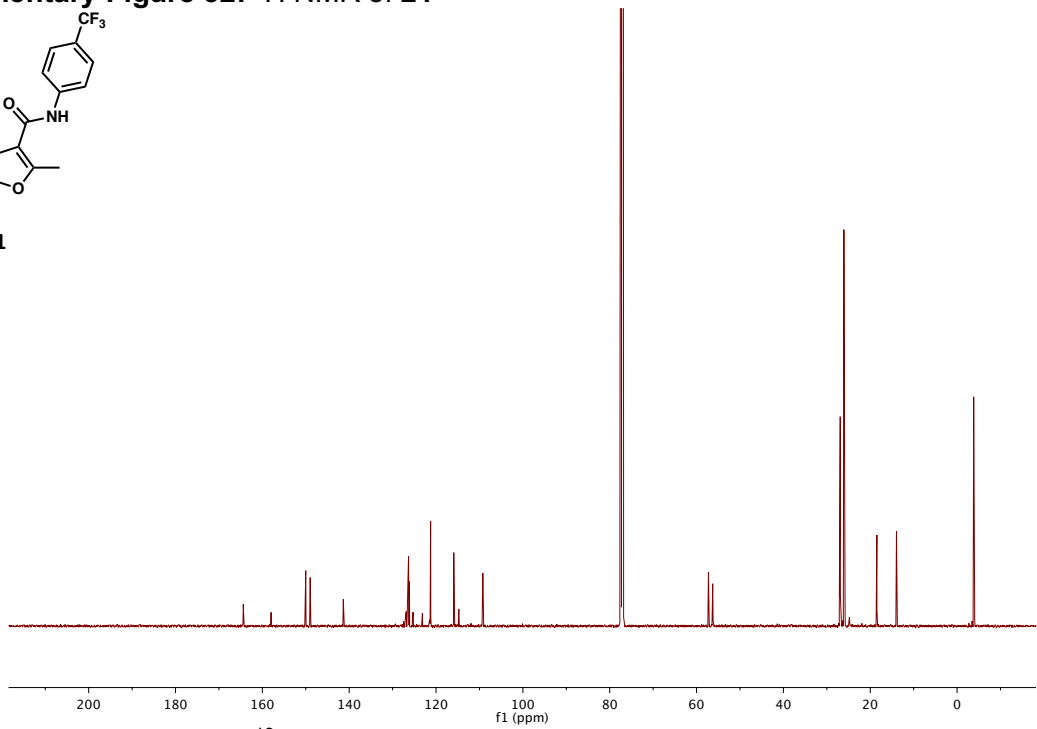

Supplementary Figure 53: <sup>13</sup>C NMR of 21

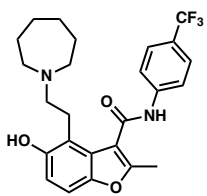

22

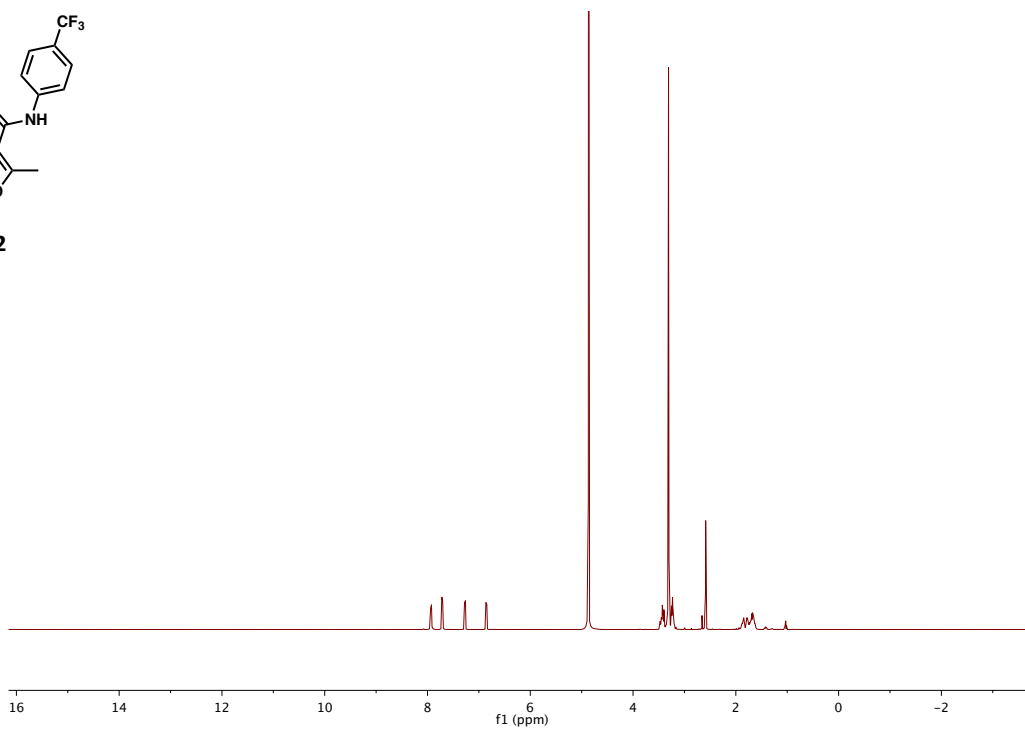

Supplementary Figure 54: <sup>1</sup>H NMR of 22

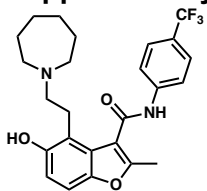

22

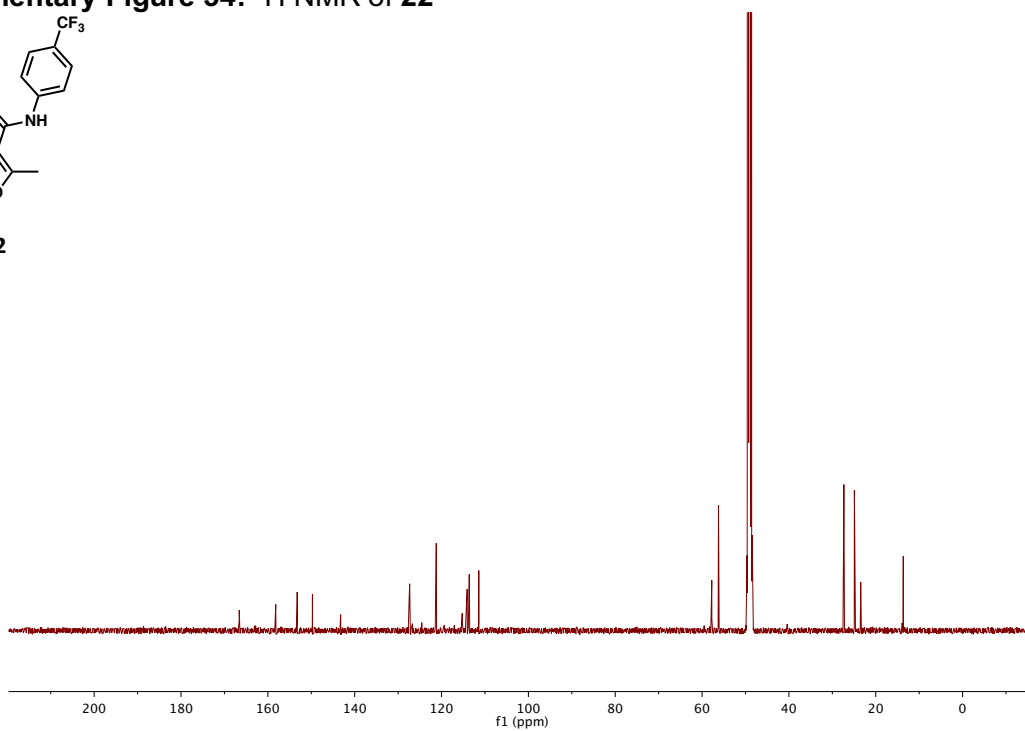

Supplementary Figure 55: <sup>13</sup>C NMR of 22

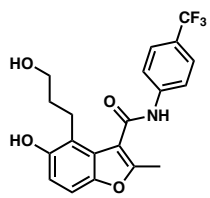

23

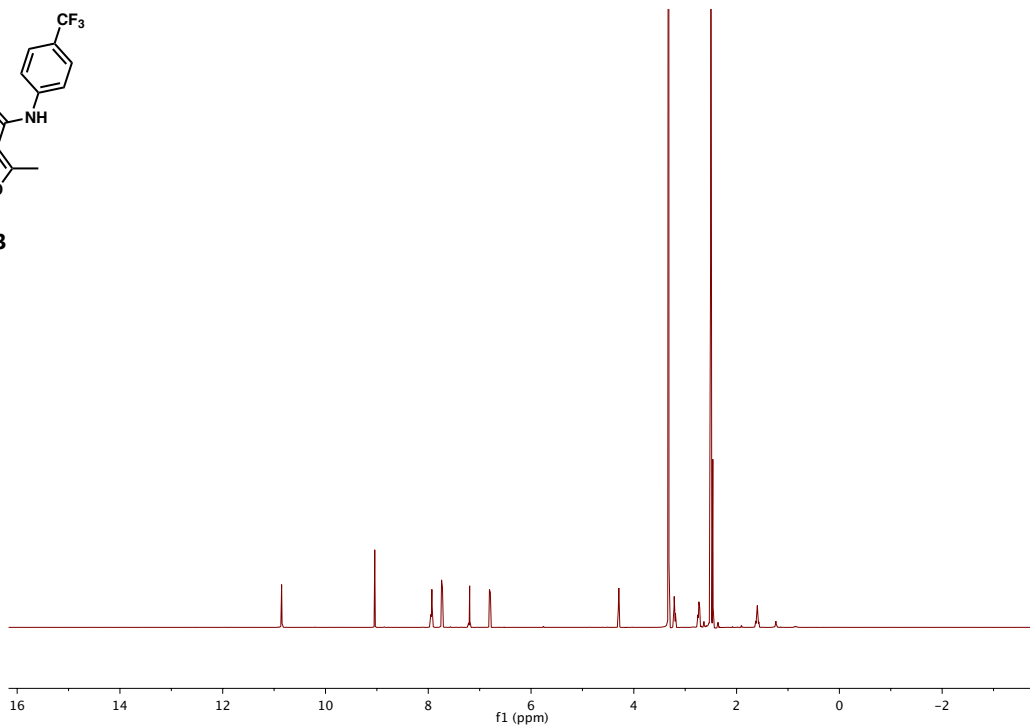

Supplementary Figure 56:  $^1\text{H}$  NMR of 23

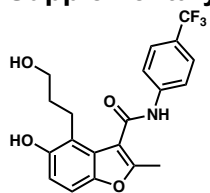

23

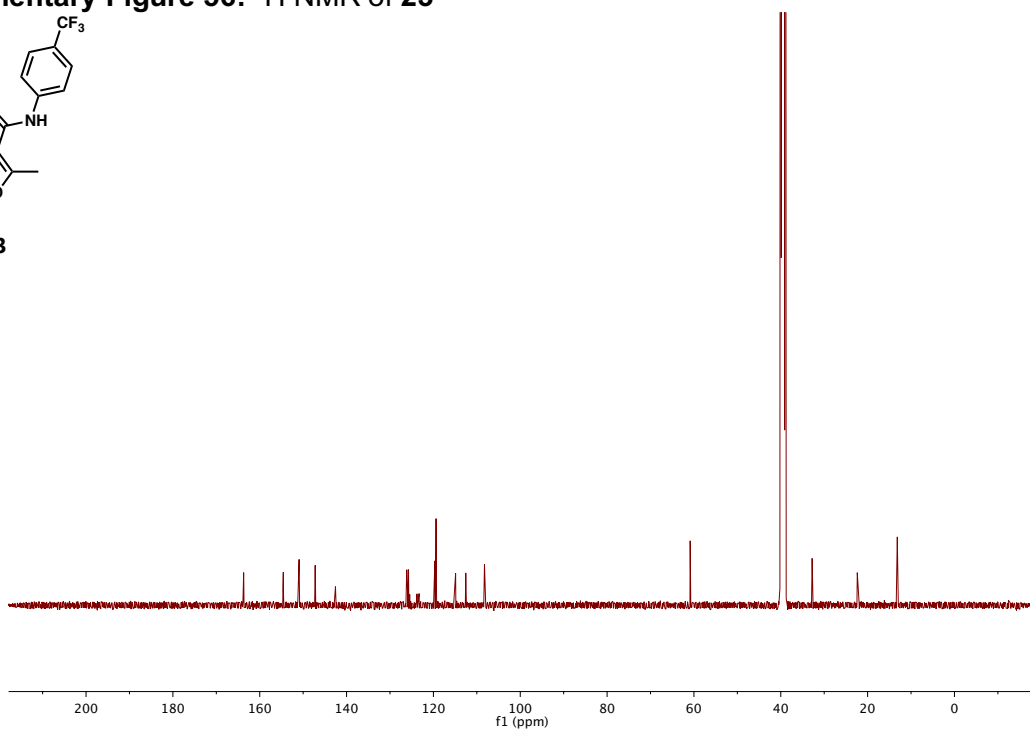

Supplementary Figure 57:  $^{13}\text{C}$  NMR of 23

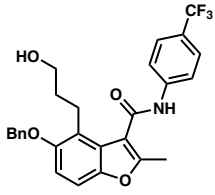

24

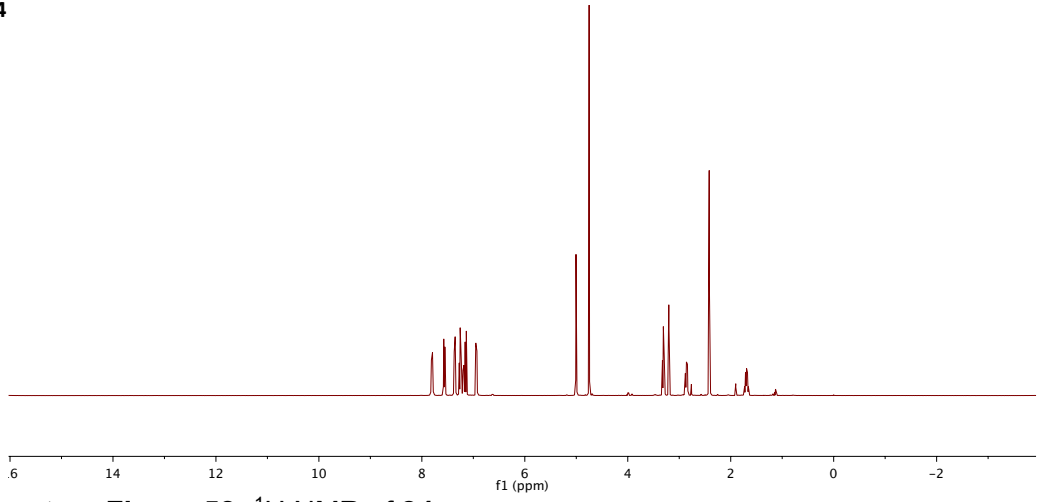

Supplementary Figure 58: <sup>1</sup>H NMR of 24

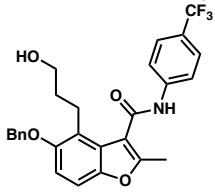

24

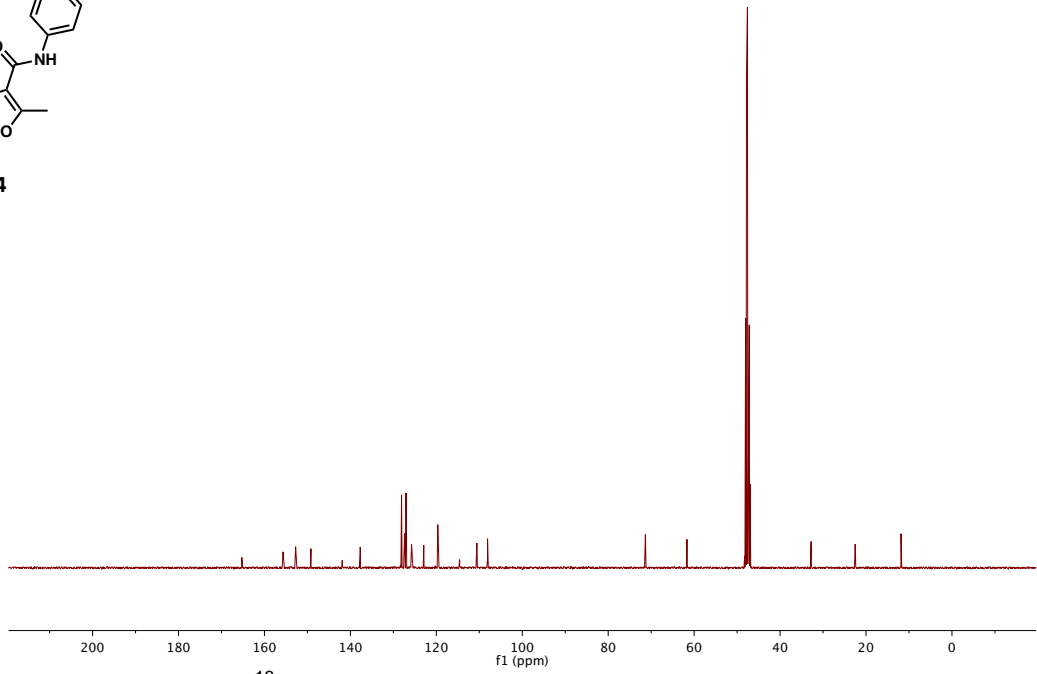

Supplementary Figure 59: <sup>13</sup>C NMR of 24

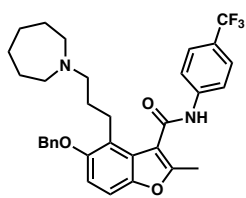

25

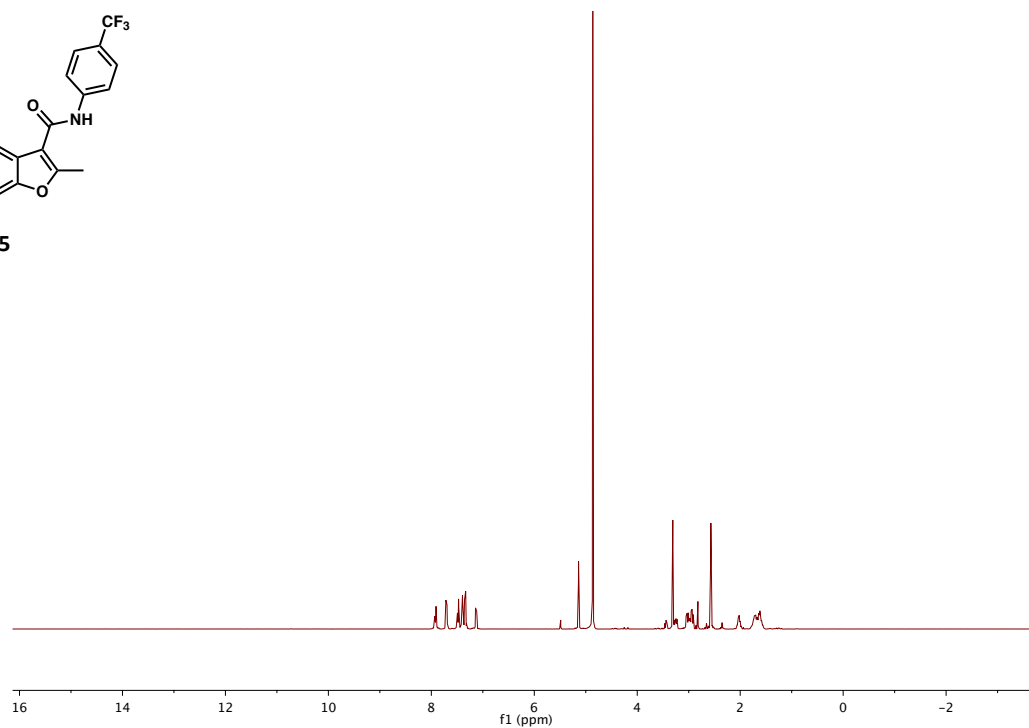

Supplementary Figure 60: <sup>1</sup>H NMR of 25

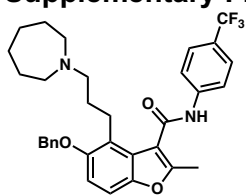

25

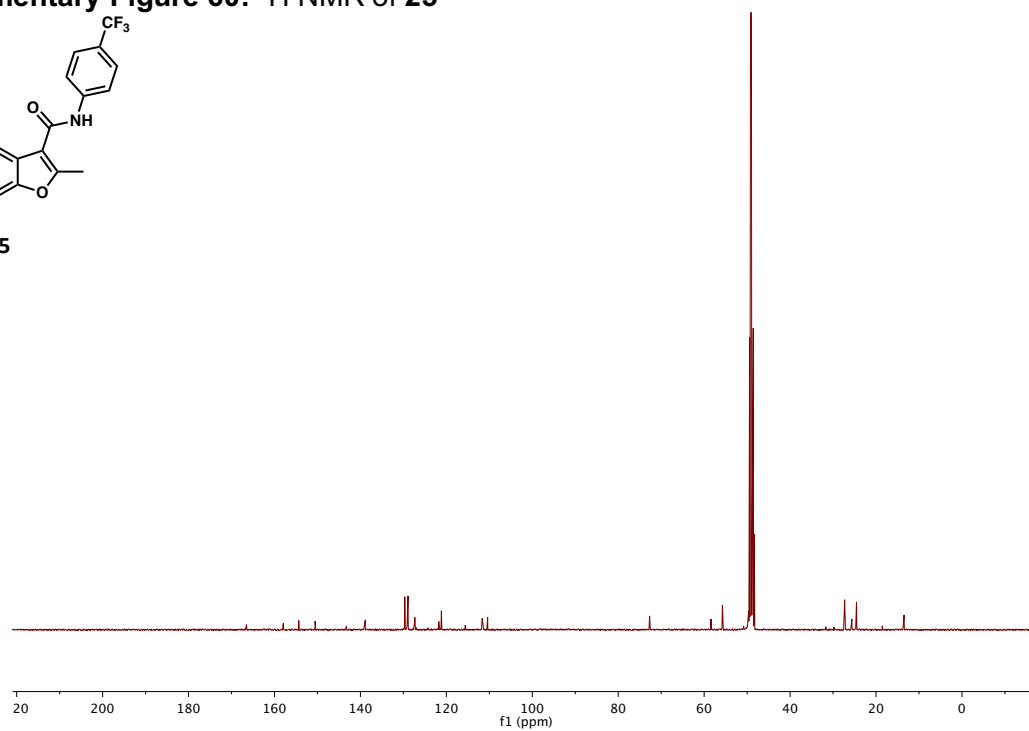

Supplementary Figure 61: <sup>13</sup>C NMR of 25

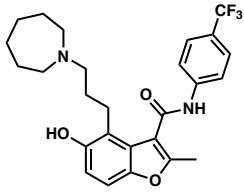

26

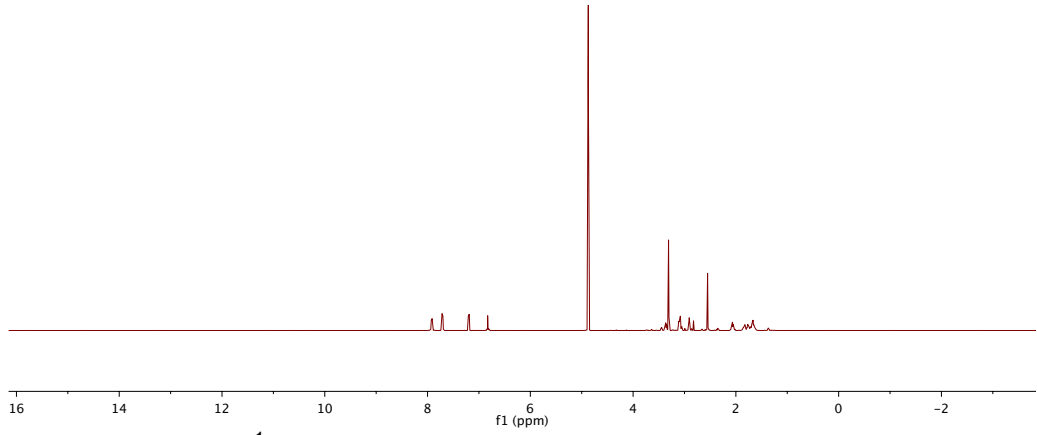

Supplementary Figure 62: <sup>1</sup>H NMR of 26

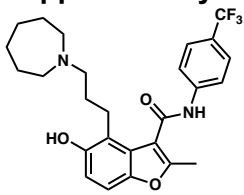

26

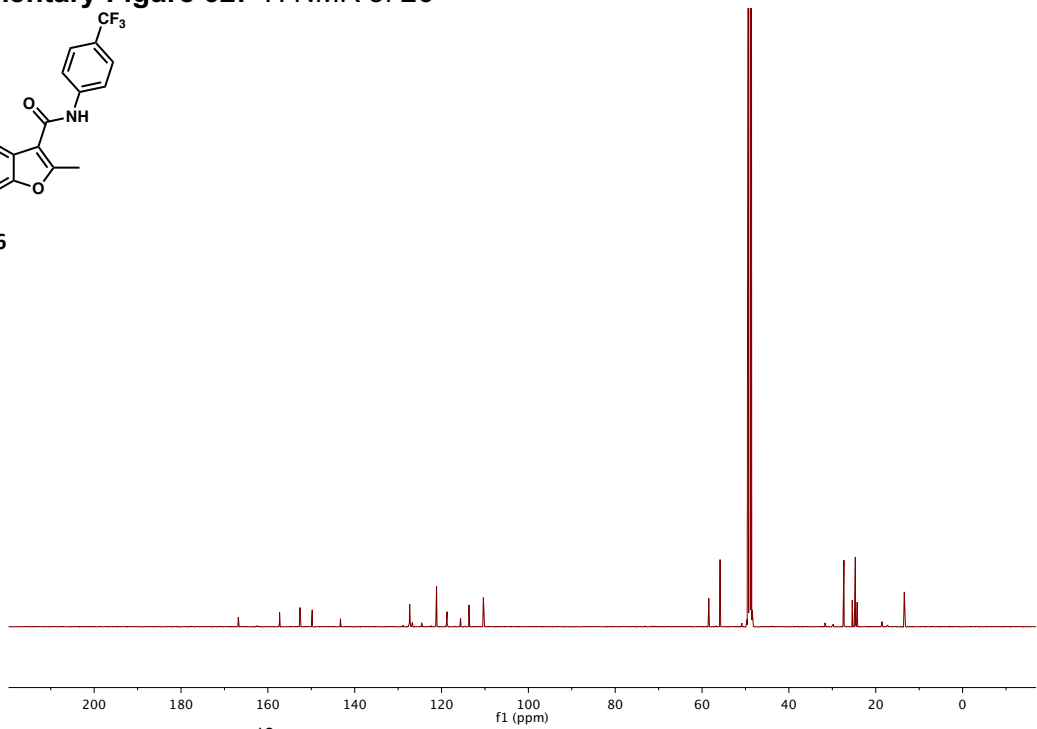

Supplementary Figure 63: <sup>13</sup>C NMR of 26



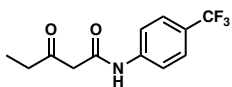

27

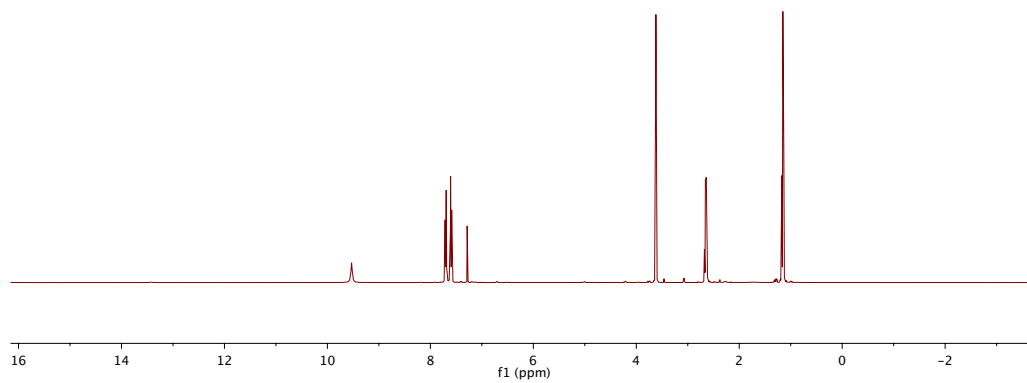

Supplementary Figure 64: <sup>1</sup>H NMR of 27

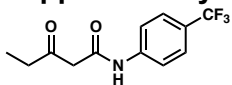

27

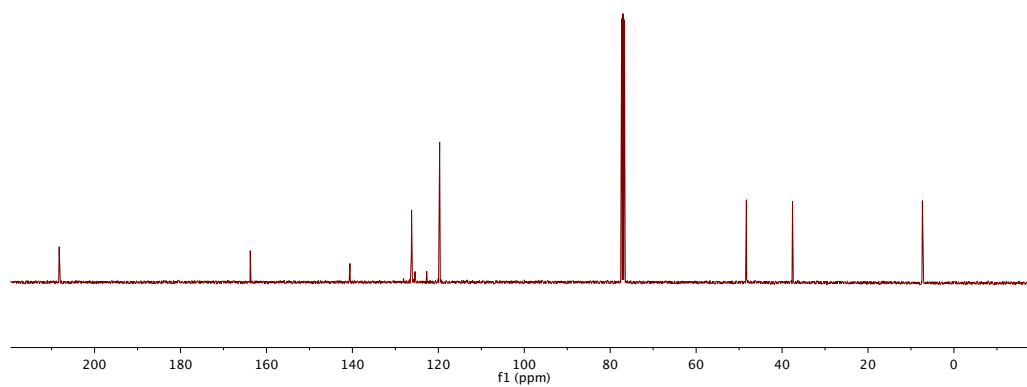

Supplementary Figure 65: <sup>13</sup>C NMR of 27

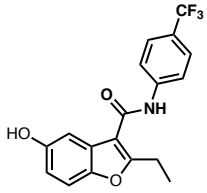

28

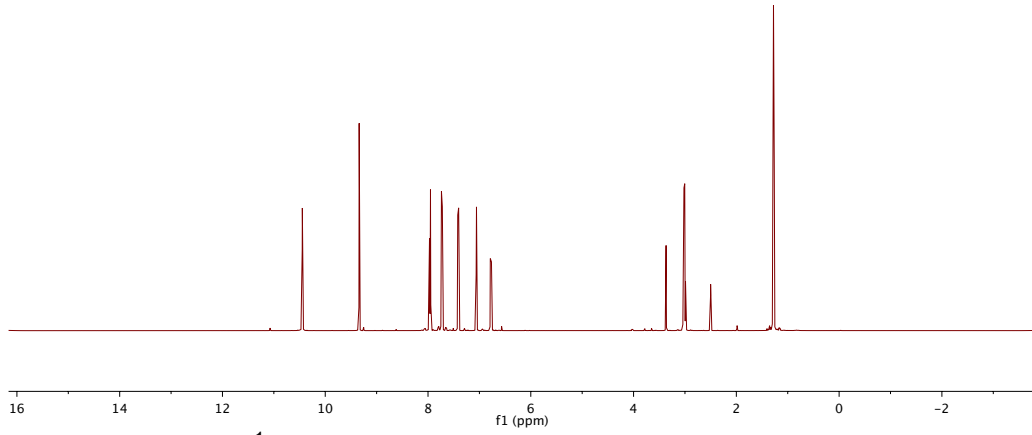

Supplementary Figure 66: <sup>1</sup>H NMR of 28

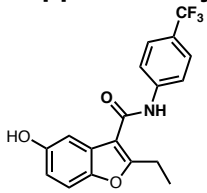

28

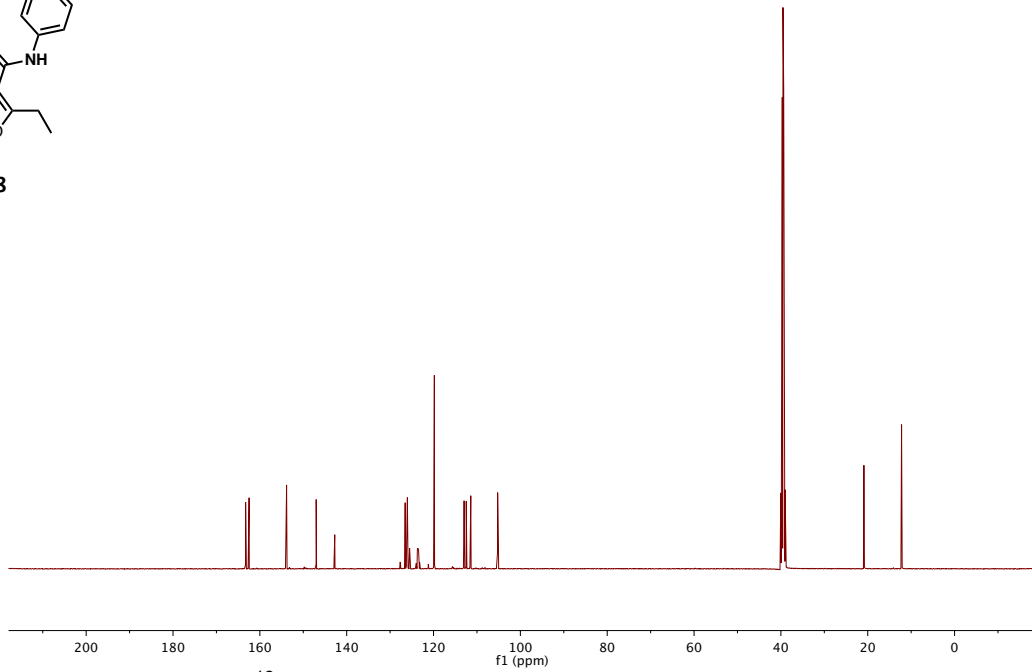

Supplementary Figure 67: <sup>13</sup>C NMR of 28

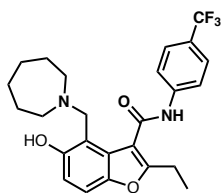

29

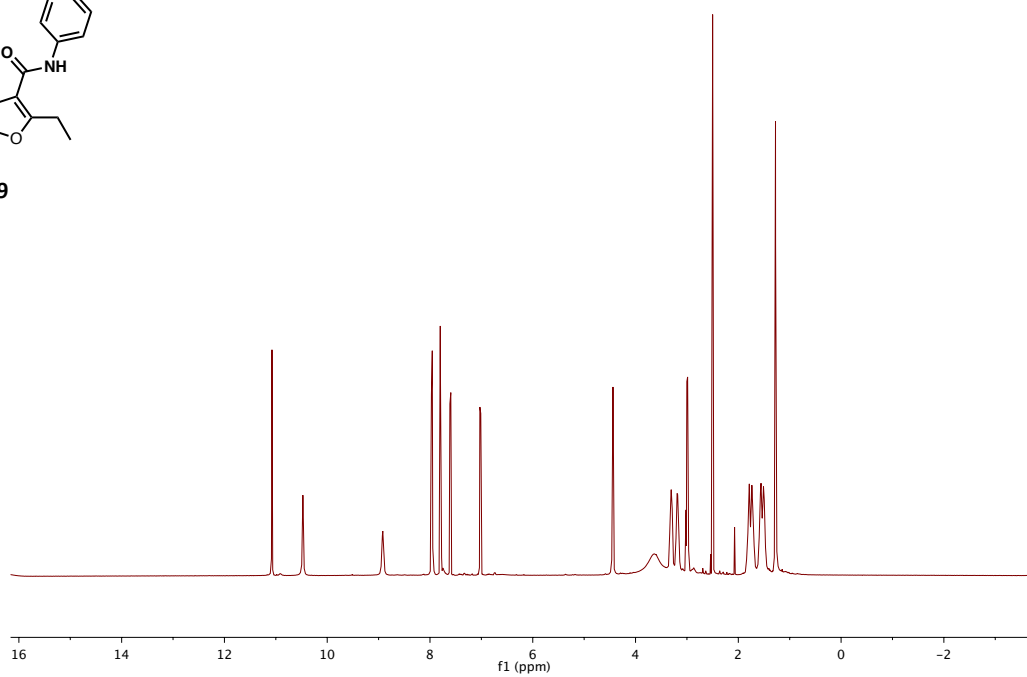

Supplementary Figure 68: <sup>1</sup>H NMR of 29

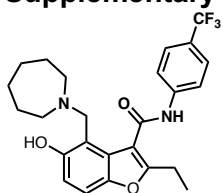

29

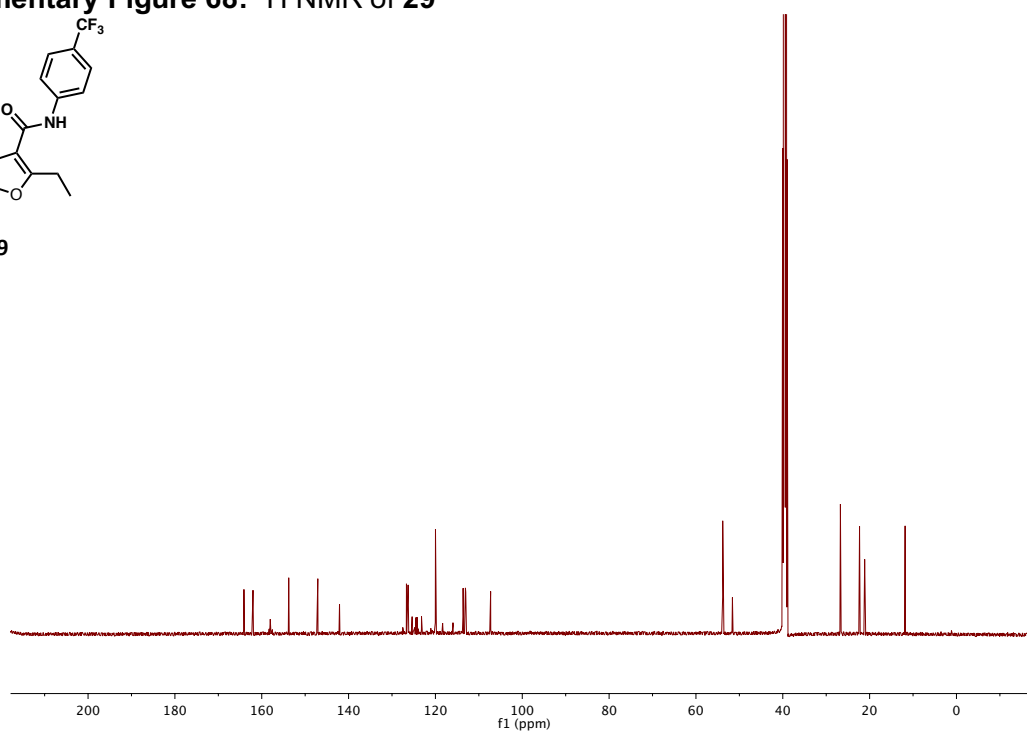

Supplementary Figure 69: <sup>13</sup>C NMR of 29

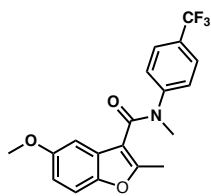

30

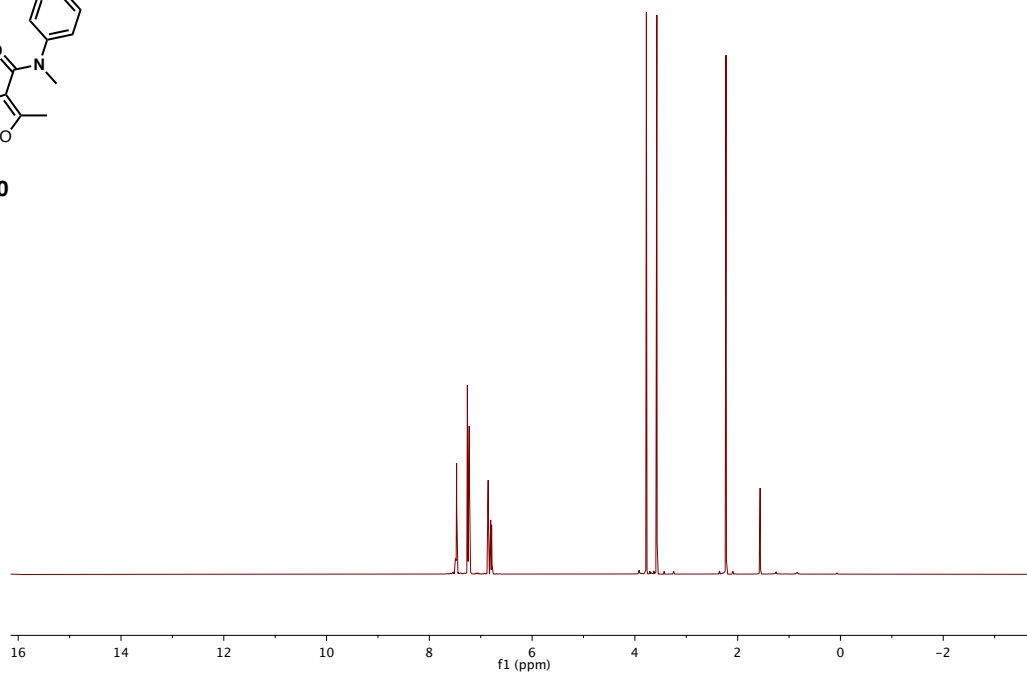

Supplementary Figure 70: <sup>1</sup>H NMR of 30

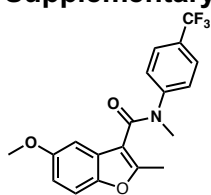

30

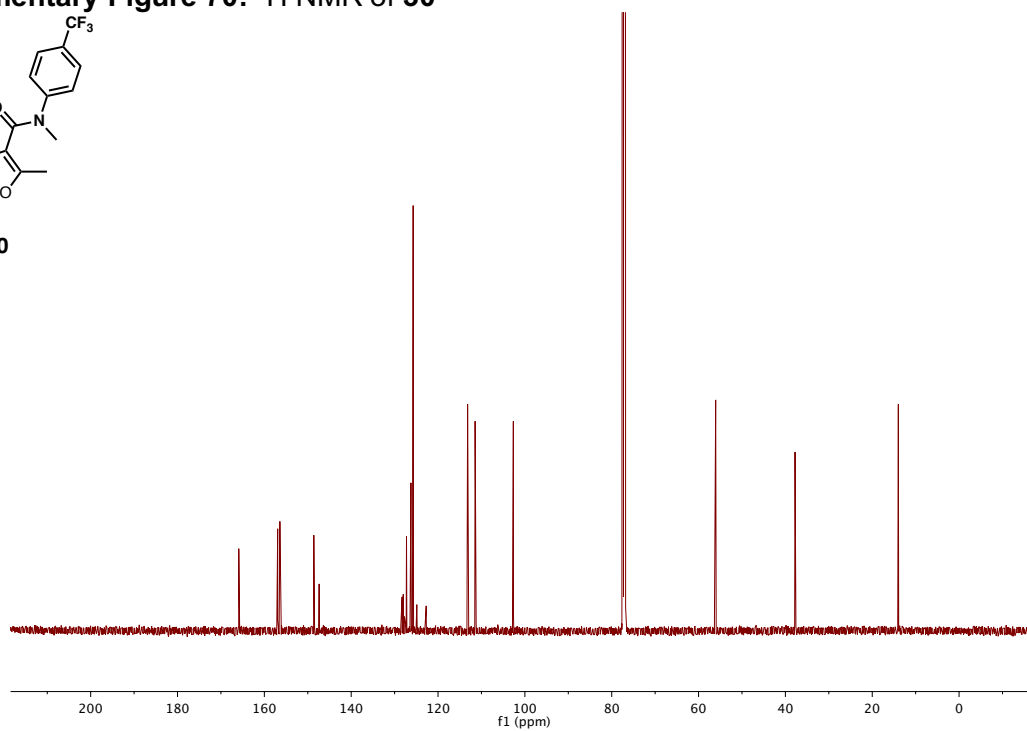

Supplementary Figure 71: <sup>13</sup>C NMR of 30

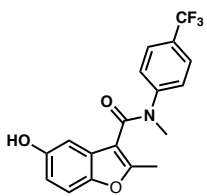

31

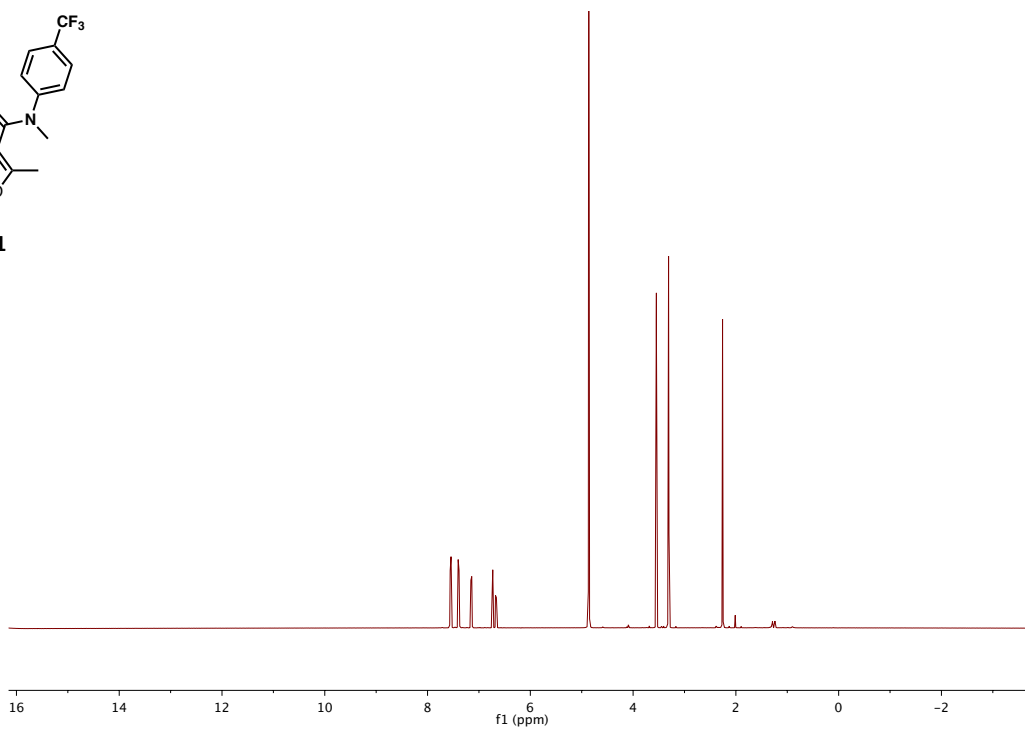

Supplementary Figure 72: <sup>1</sup>H NMR of 31

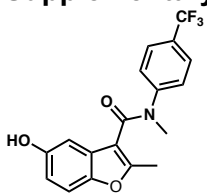

31

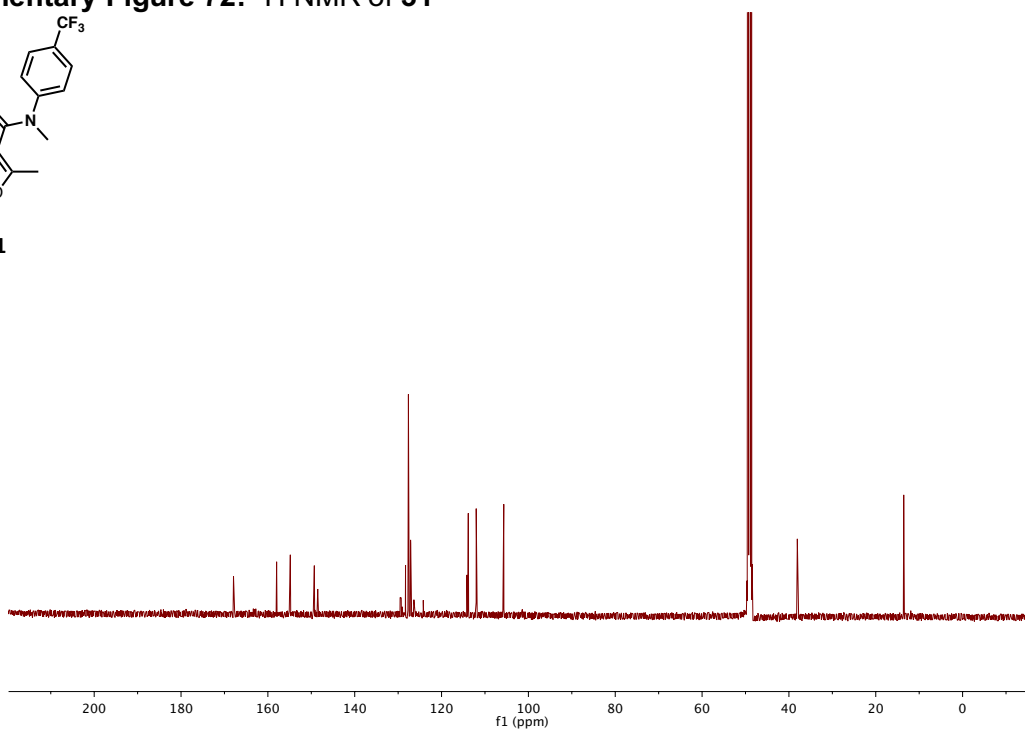

Supplementary Figure 73: <sup>13</sup>C NMR of 31

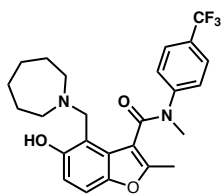

32

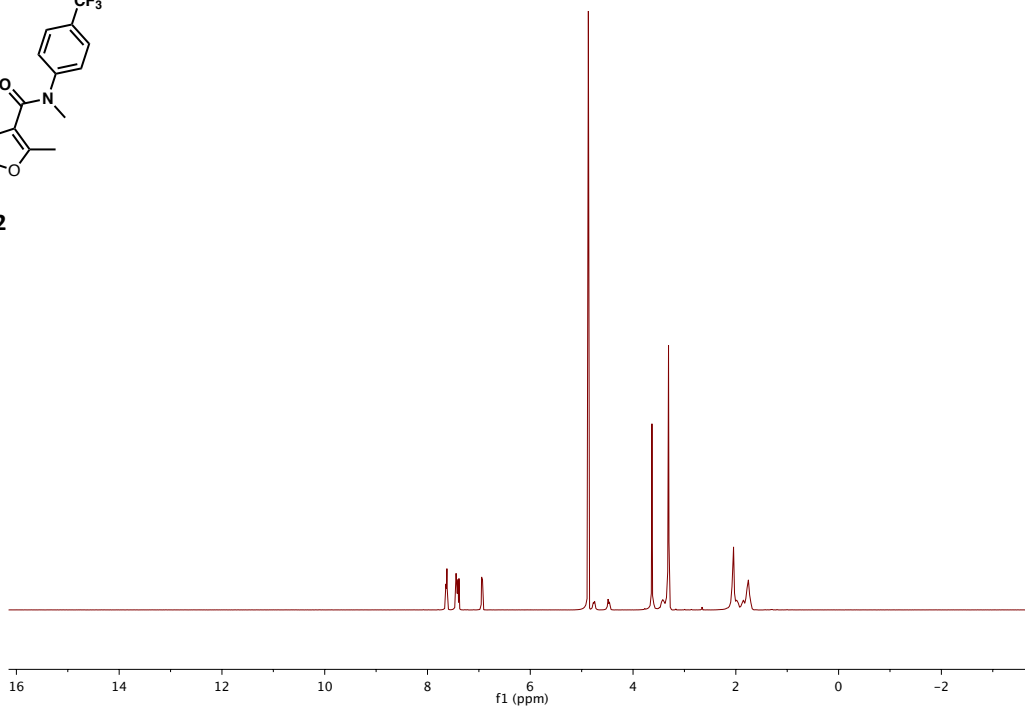

Supplementary Figure 74: <sup>1</sup>H NMR of 32

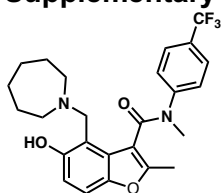

32

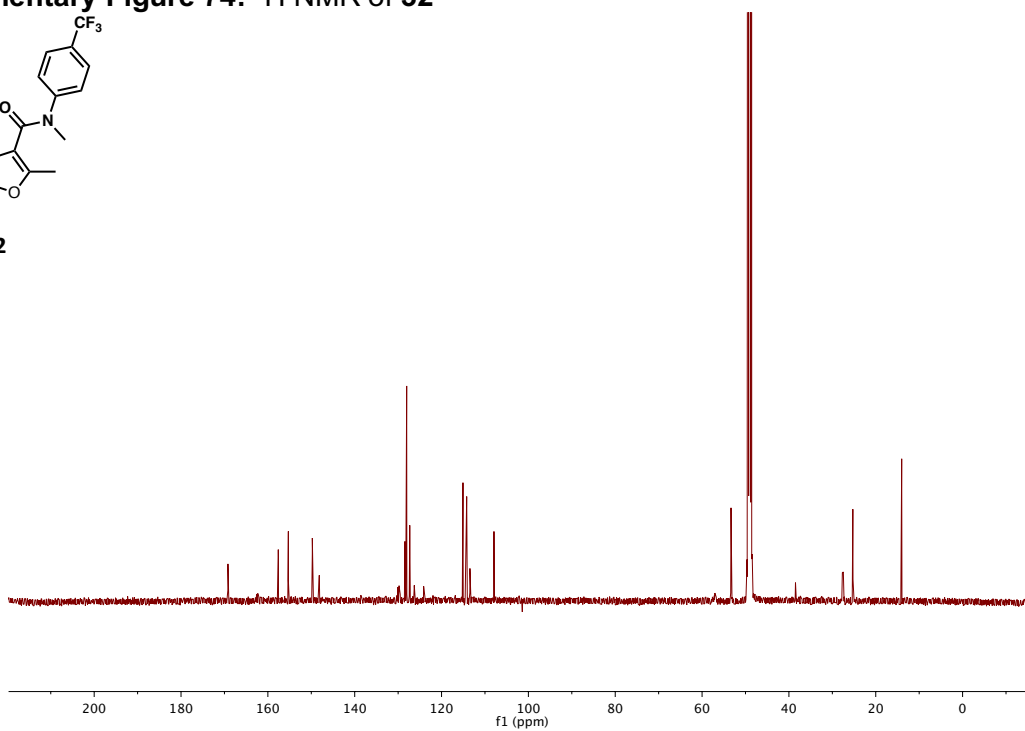

Supplementary Figure 75: <sup>13</sup>C NMR of 32

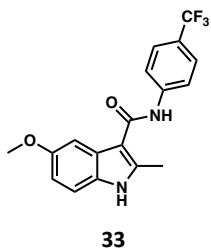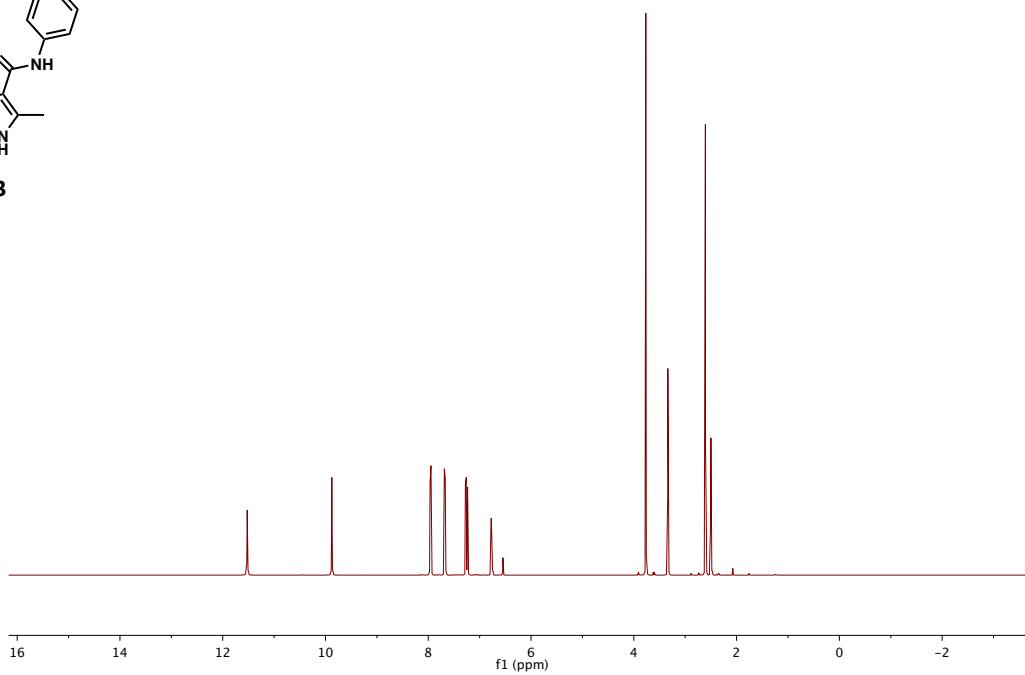

**Supplementary Figure 76: <sup>1</sup>H NMR of 33**

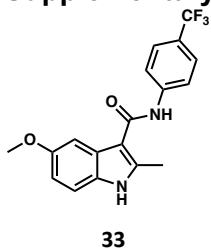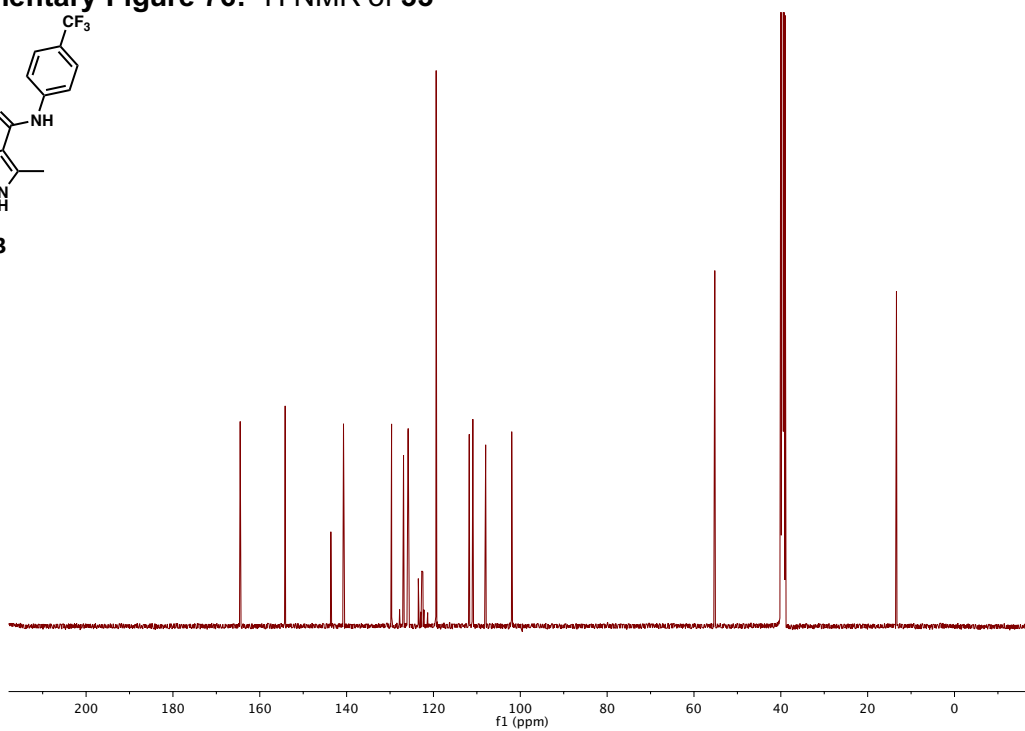

**Supplementary Figure 77: <sup>13</sup>C NMR of 33**

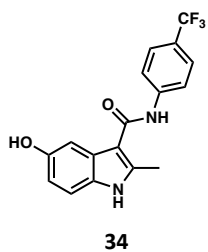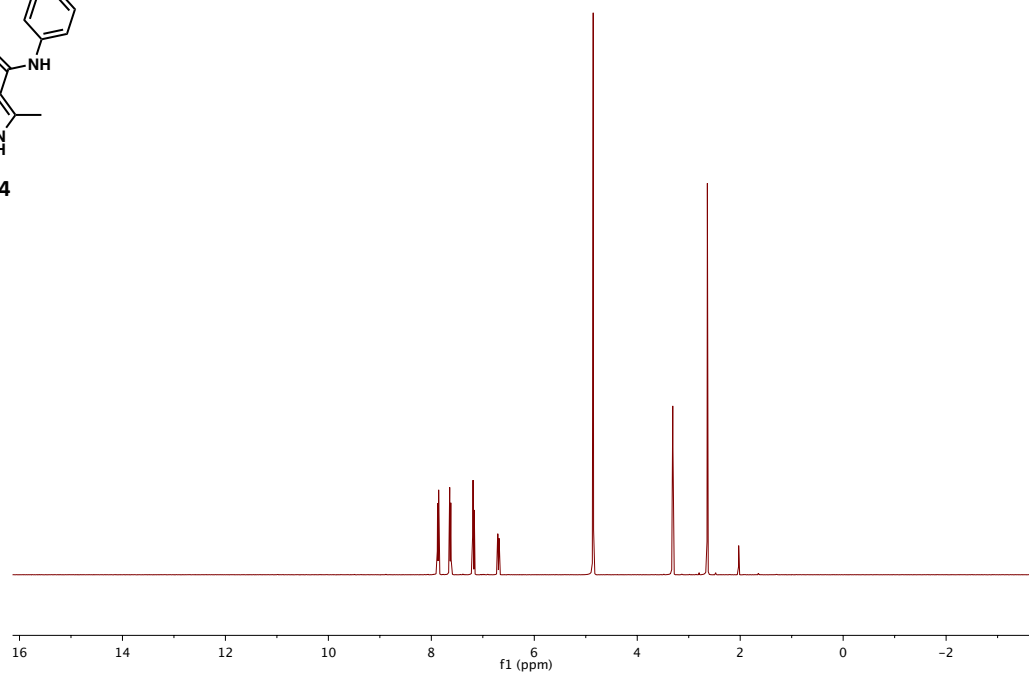

**Supplementary Figure 78: <sup>1</sup>H NMR of 34**

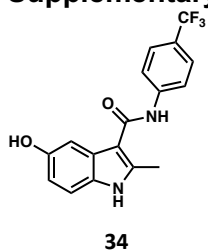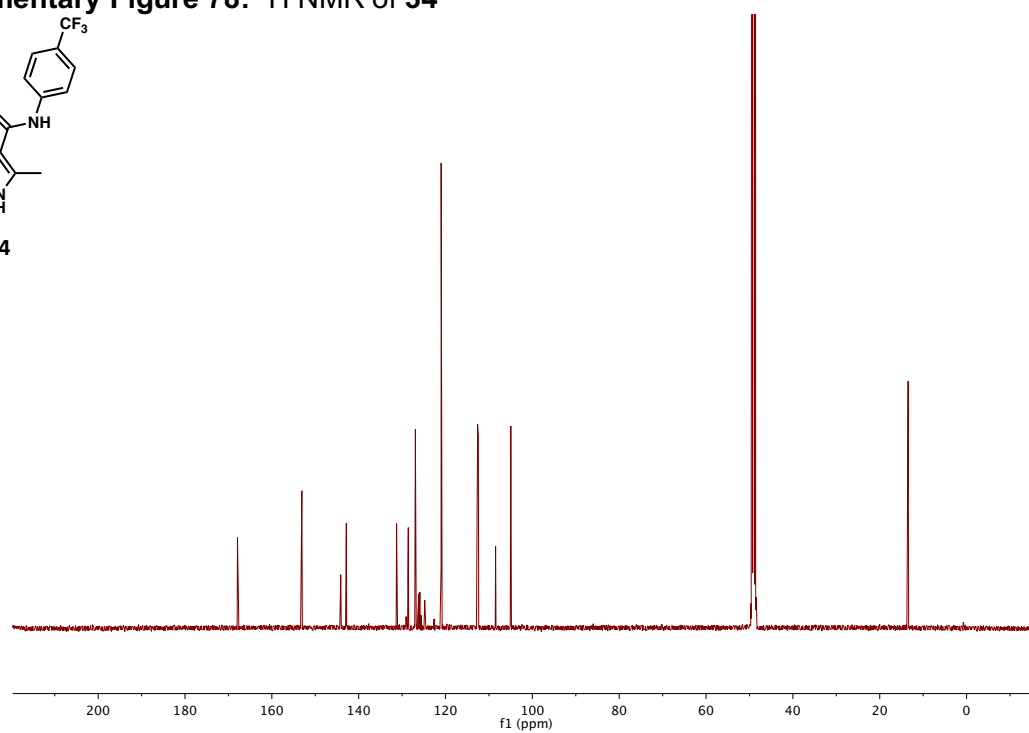

**Supplementary Figure 79: <sup>13</sup>C NMR of 34**



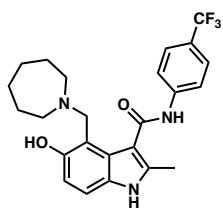

35

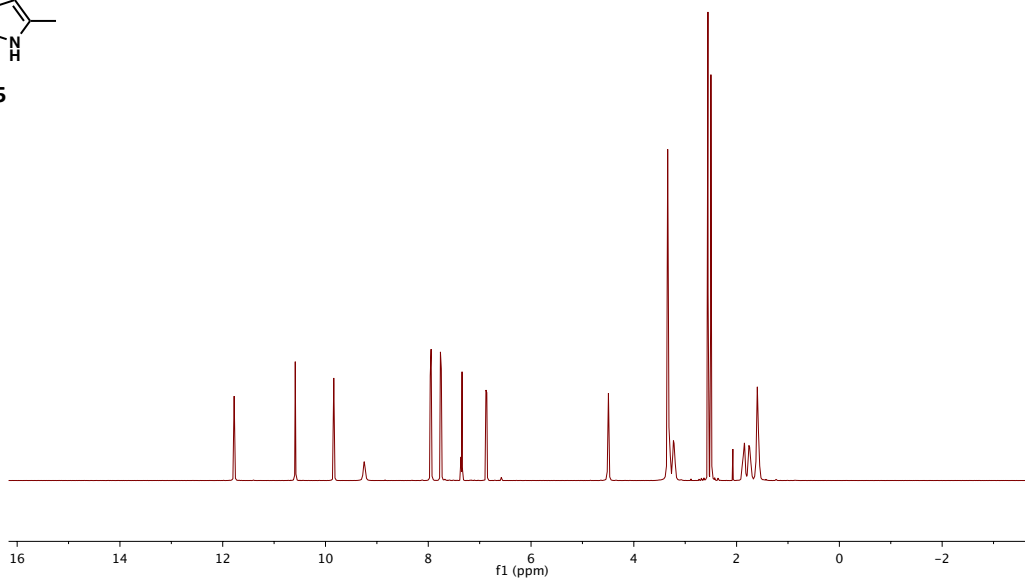

Supplementary Figure 80: <sup>1</sup>H NMR of 35

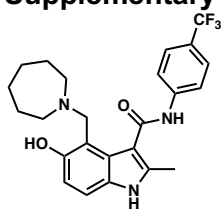

35

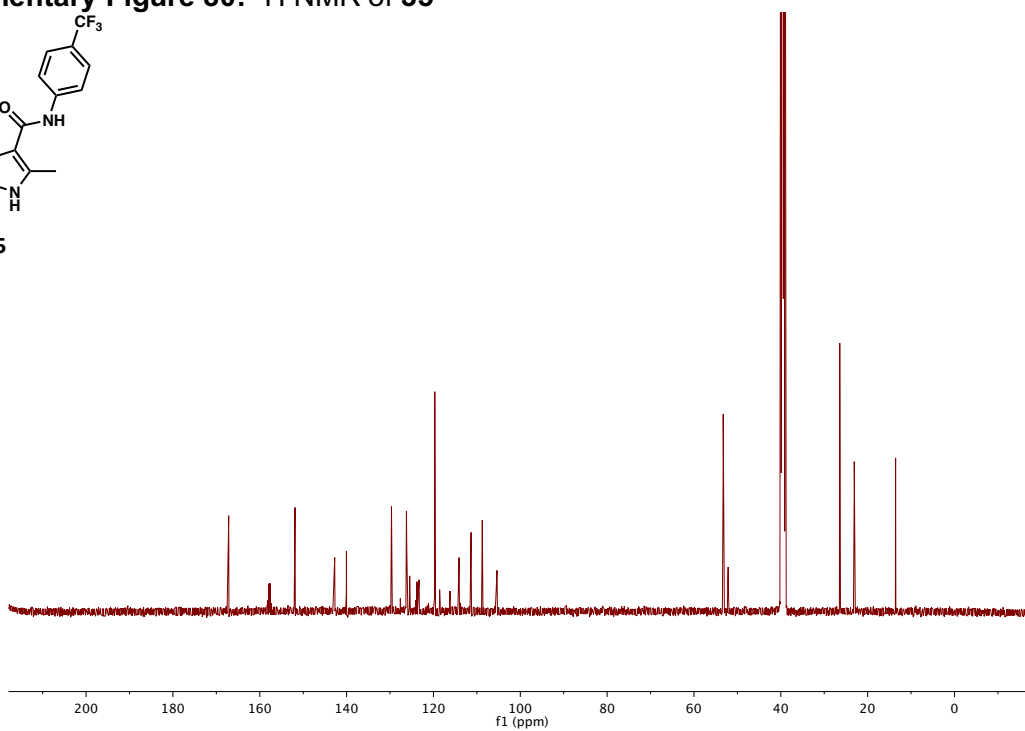

Supplementary Figure 81: <sup>13</sup>C NMR of 35

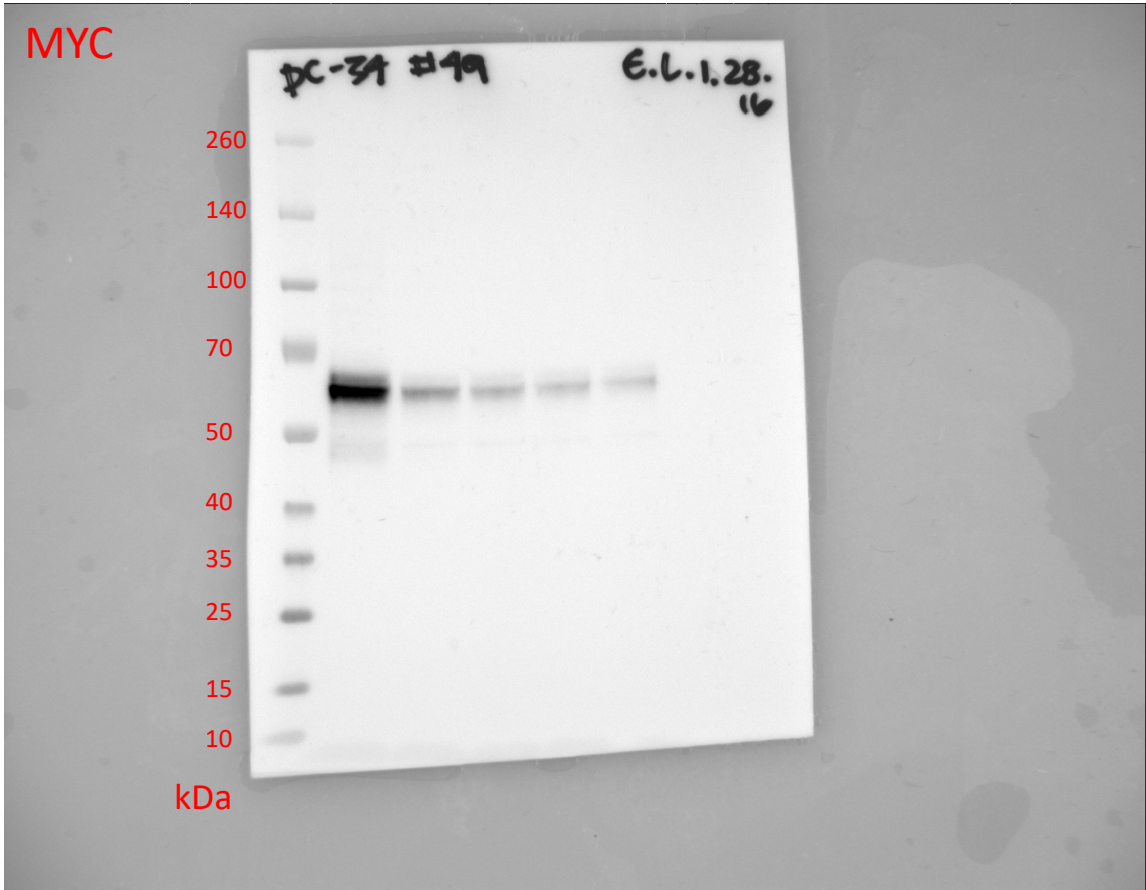

Supplementary Figure 82: Raw Western blot of MYC in Figure 3B.

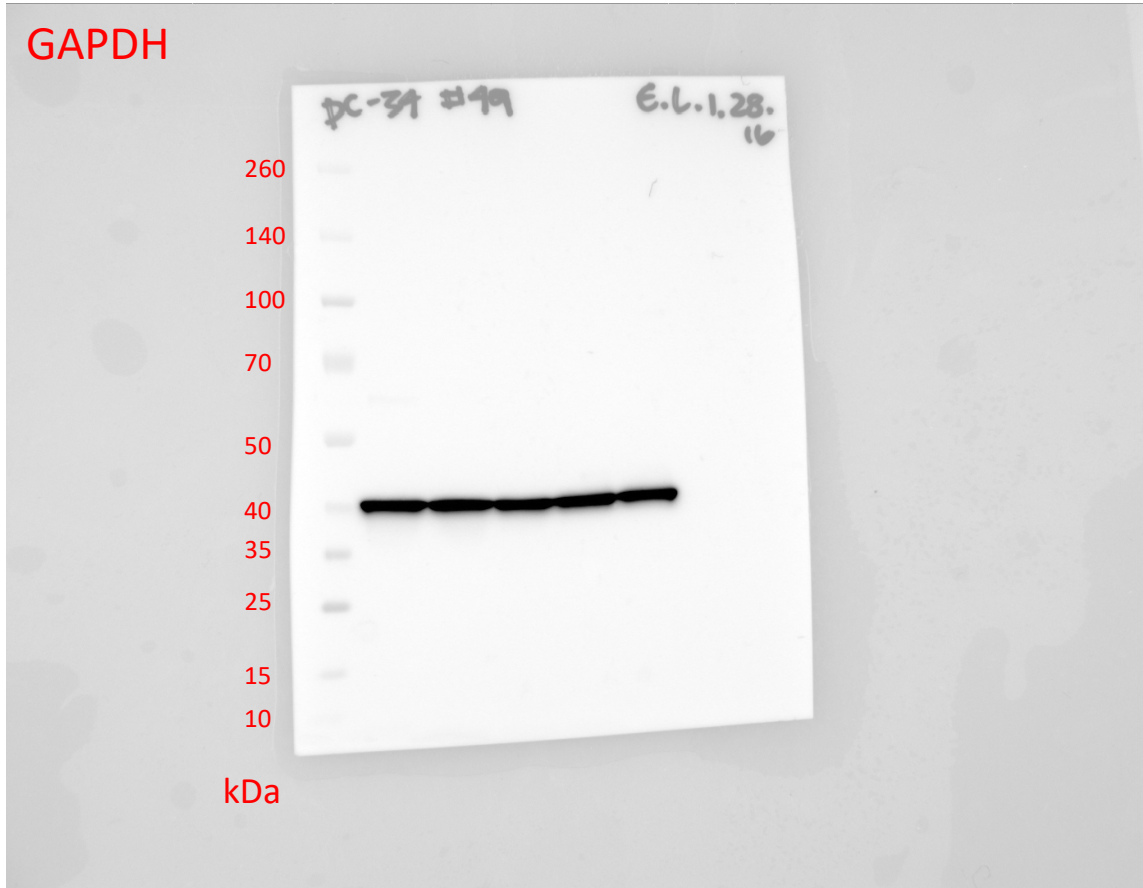

**Supplementary Figure 83:** Raw Western blot of GAPDH in Figure 3B.

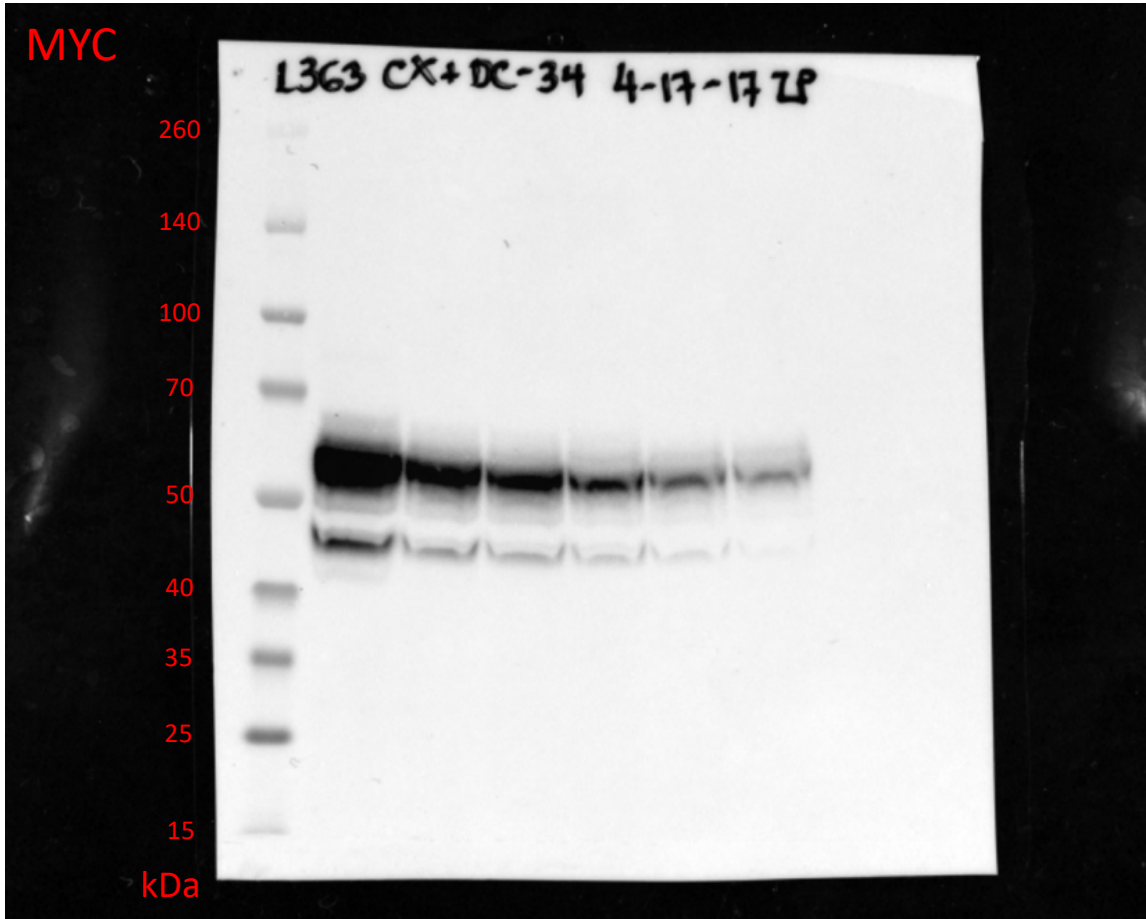

**Supplementary Figure 84:** Raw Western blot of MYC for CX in Figure 3D.

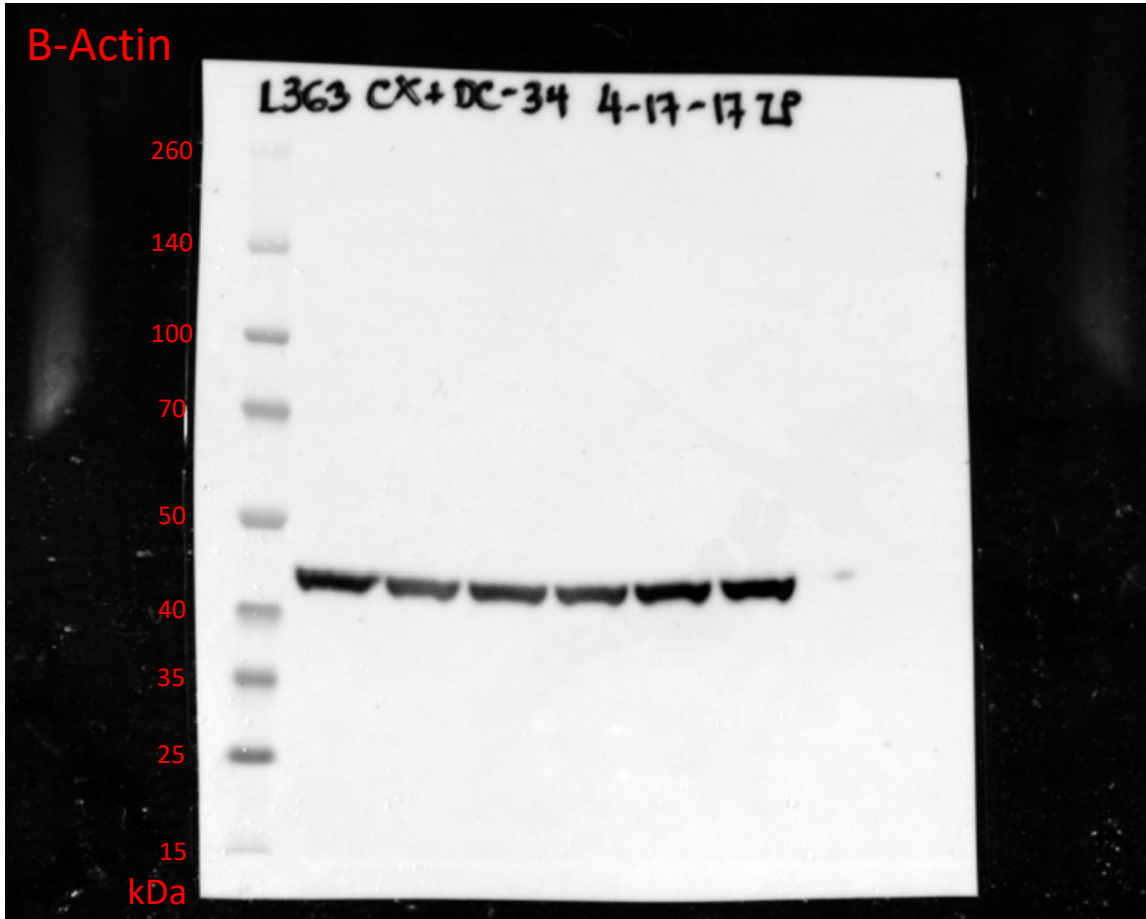

**Supplementary Figure 85:** Raw Western blot of Actin for CX in Figure 3D.

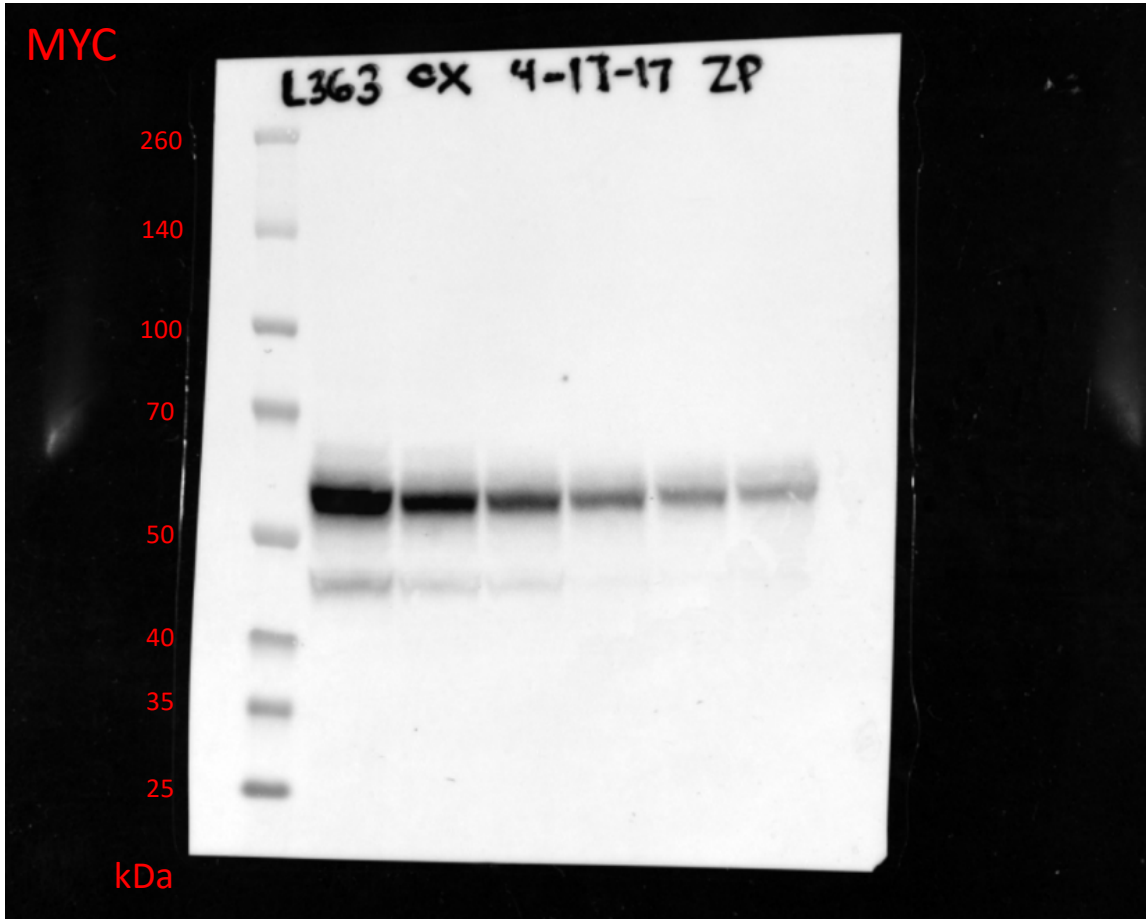

**Supplementary Figure 86:** Raw Western blot of MYC for CX + DC-34 in Figure 3D.

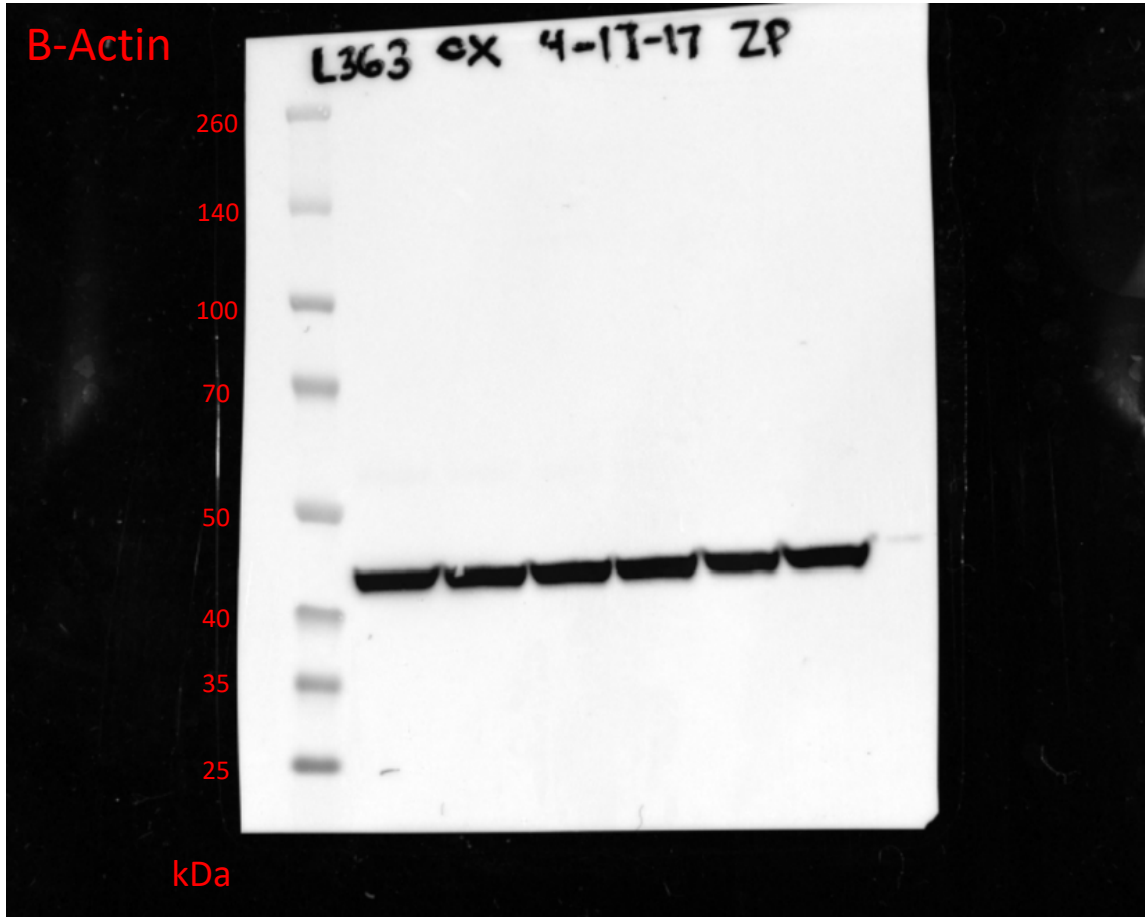

**Supplementary Figure 87:** Raw Western blot of Actin for CX + DC-34 in Figure 3D.

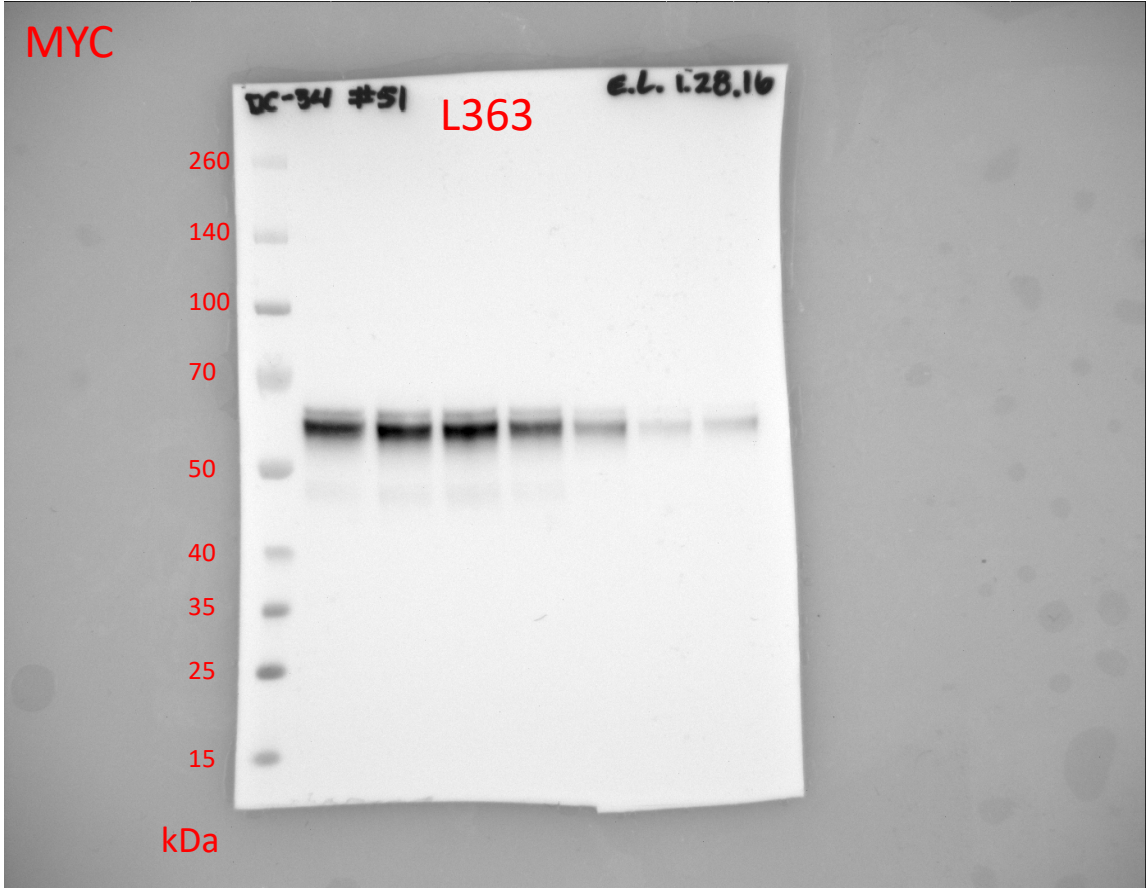

Supplementary Figure 88: Raw Western blot of MYC in L363 cells from Figure 3E.



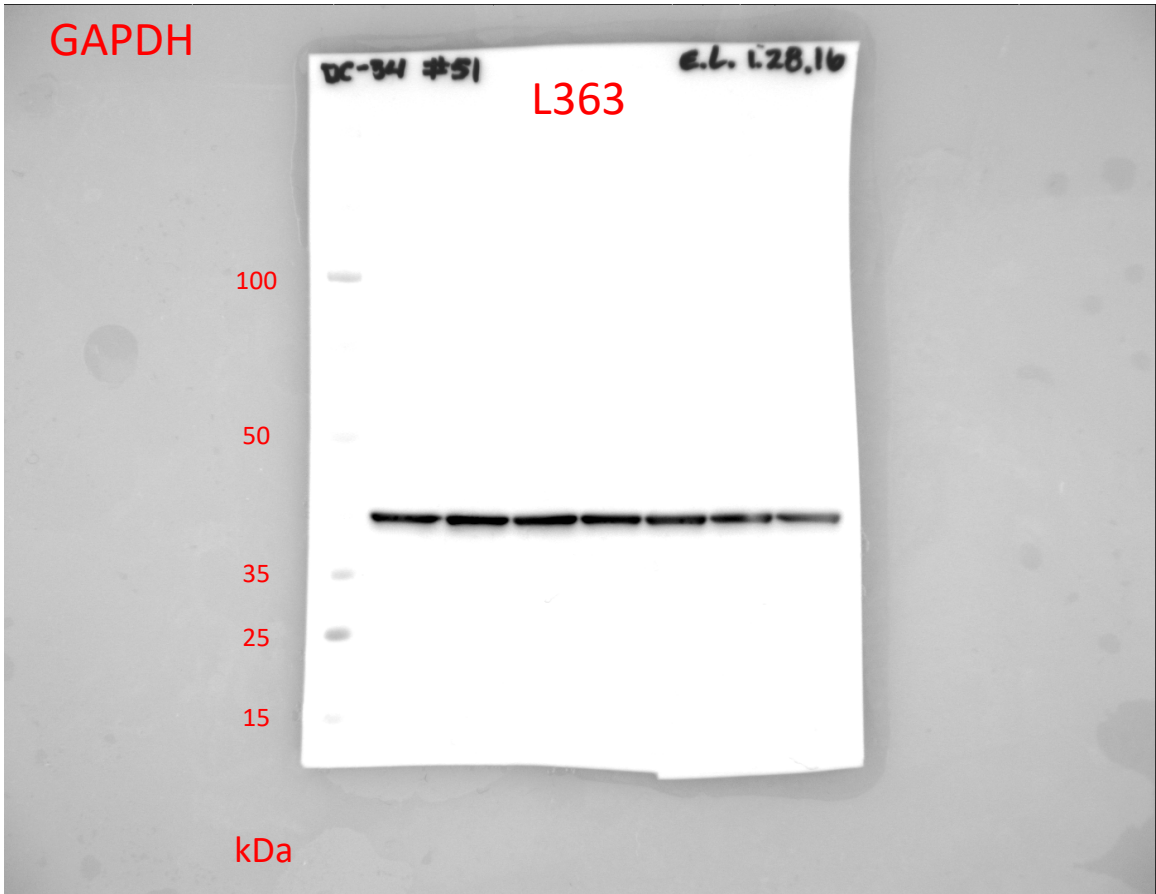

**Supplementary Figure 89:** Raw Western blot of GAPDH for L363 cells from Figure 3E.

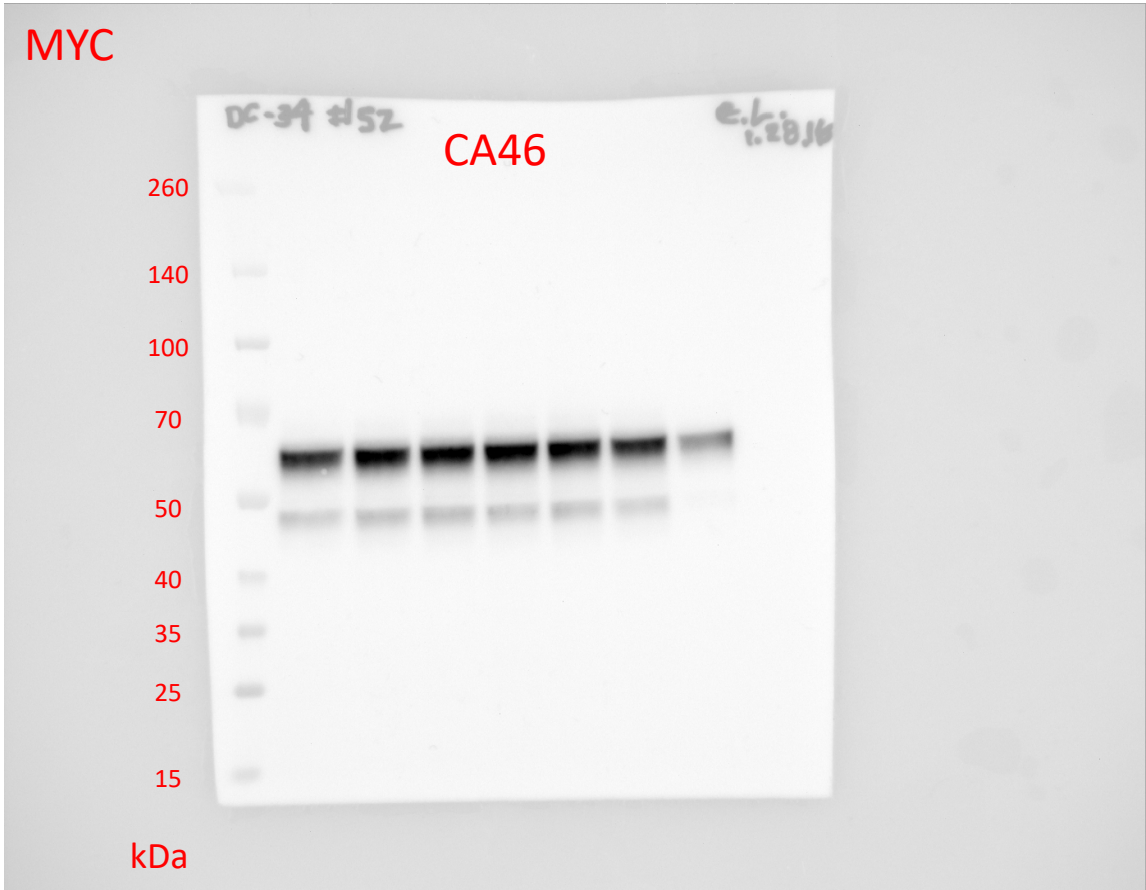

Supplementary Figure 90: Raw Western blot of MYC for CA46 cells from Figure 3E.

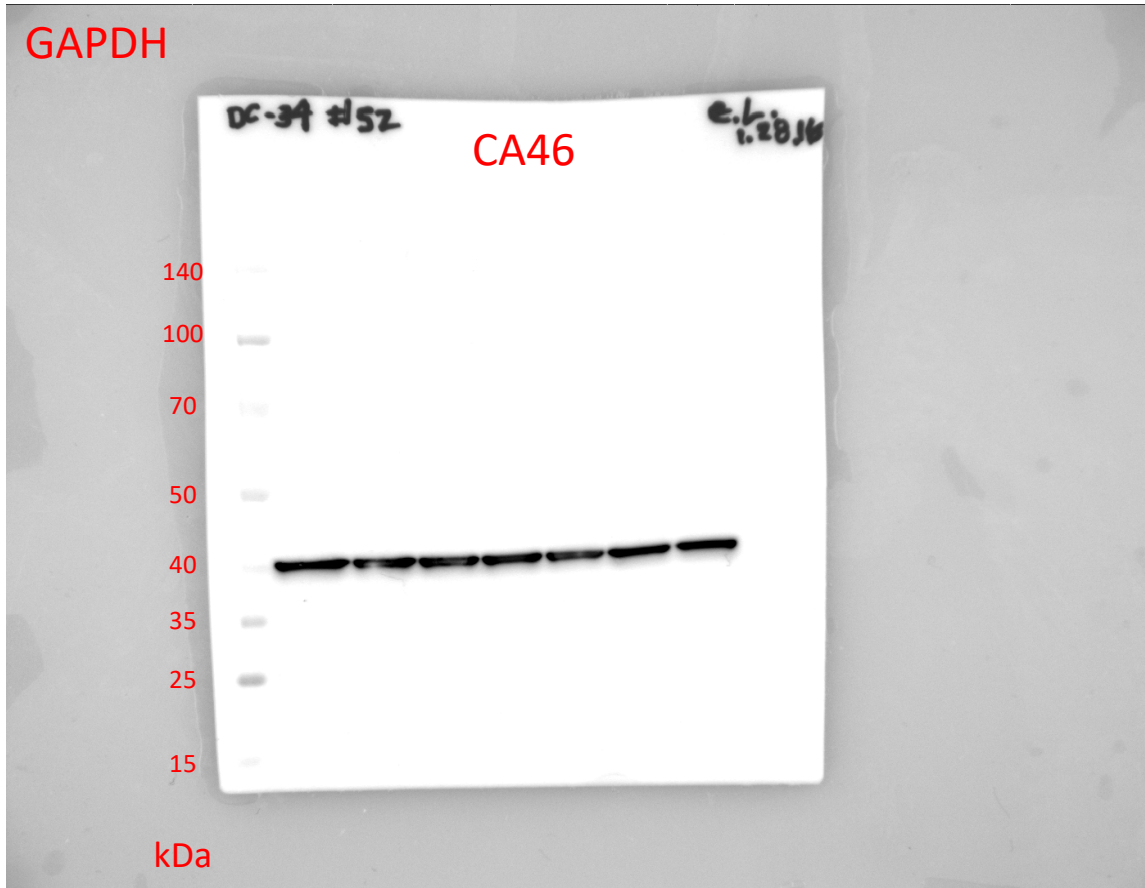

**Supplementary Figure 91:** Raw Western blot of GAPDH for CA46 cells from Figure 3E.

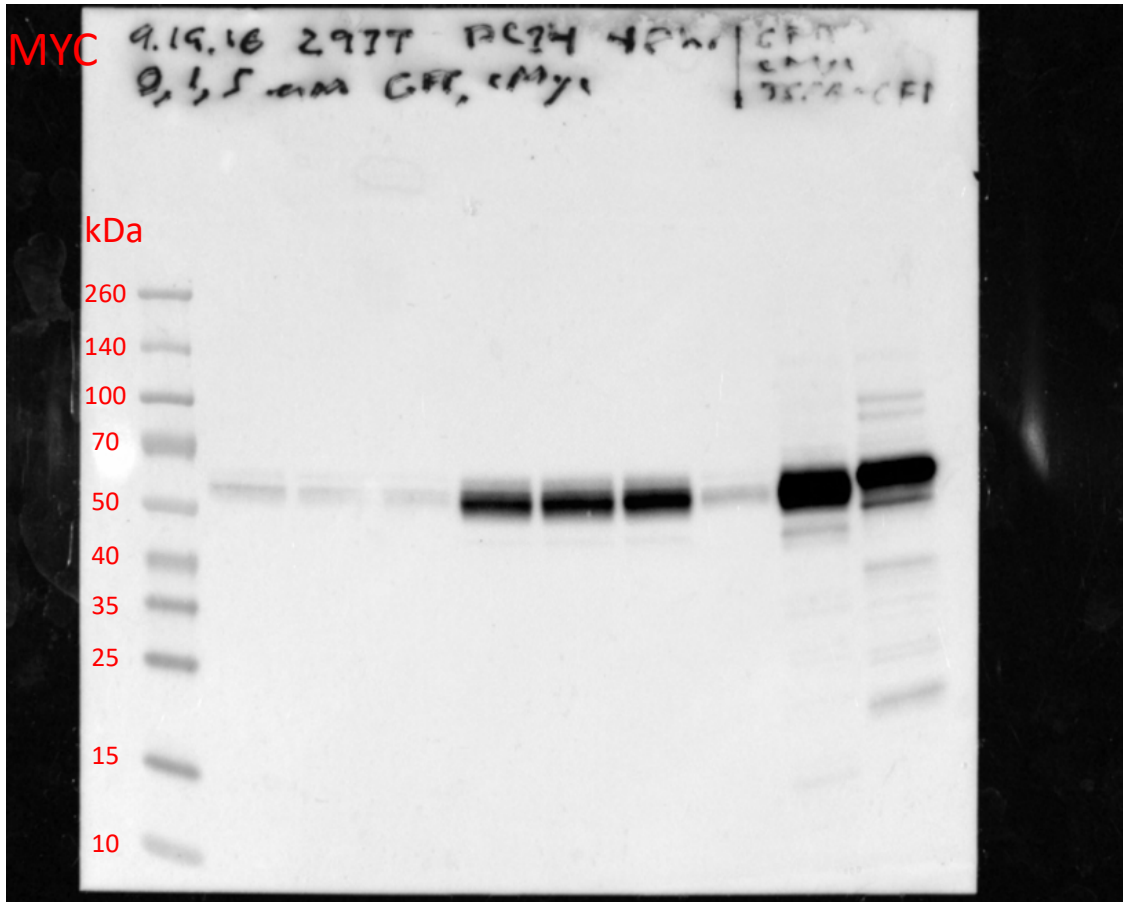

**Supplementary Figure 92:** Raw Western blot of 293T cells transiently transfected with either GFP or CMV-MYC plasmid (the CMV promoter lacks a MYC G4) (right) and dosed with different concentrations of DC-34 from Figure 3F. All western blots were exposed for less than 1 minute.

BCL2

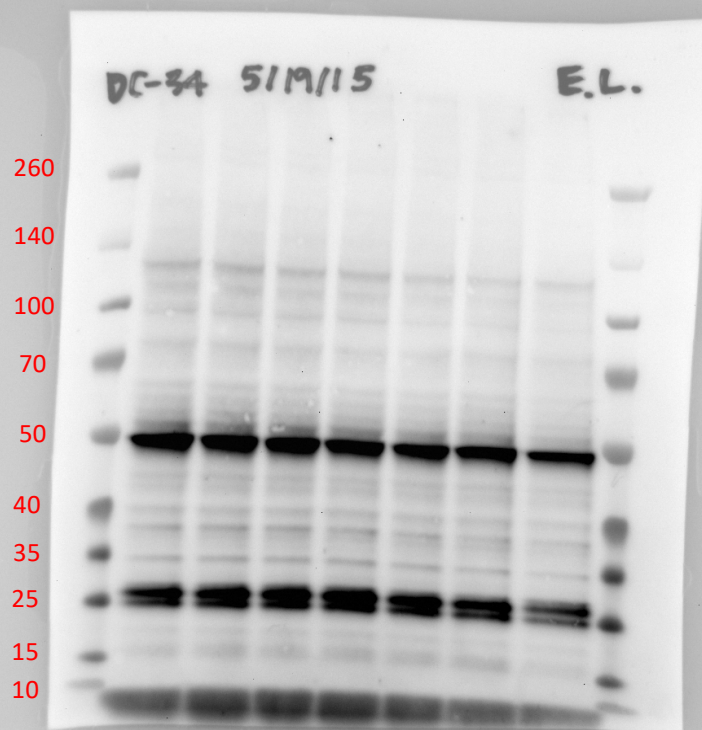

**Supplementary Figure 93:** Raw Western blot of BCL2 from Supplementary Figure 3.

RB1

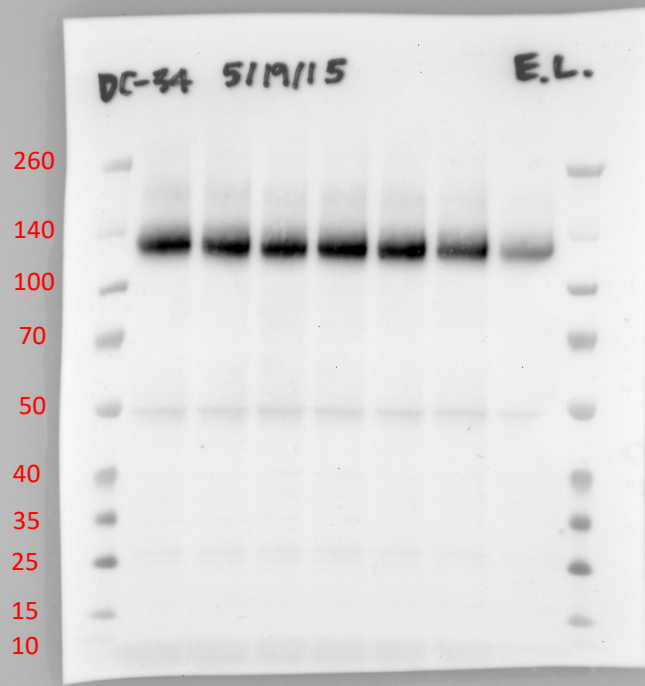

**Supplementary Figure 94:** Raw Western blot of RB1 from Supplementary Figure 3.

# Vinculin

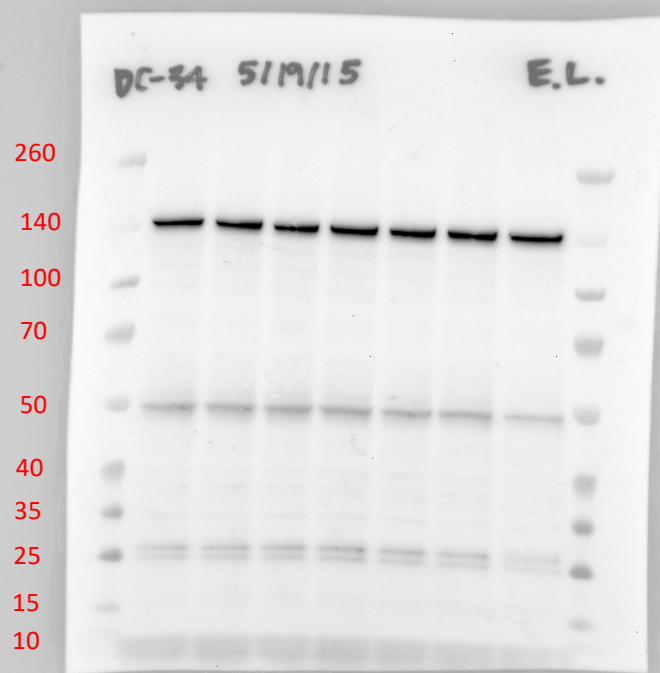

**Supplementary Figure 95:** Raw Western blot of Vinculin from Supplementary Figure 3.

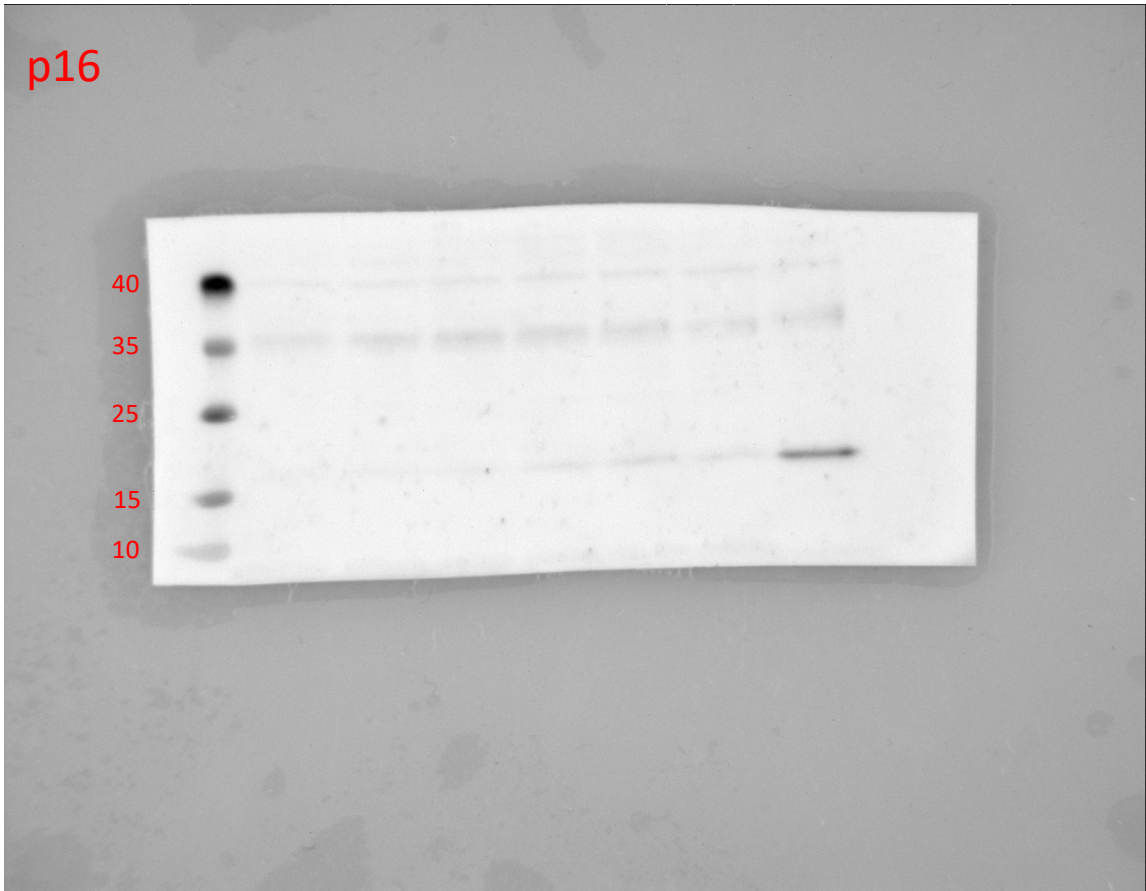

**Supplementary Figure 96:** Raw Western blot of p16 from Supplementary Figure 4.



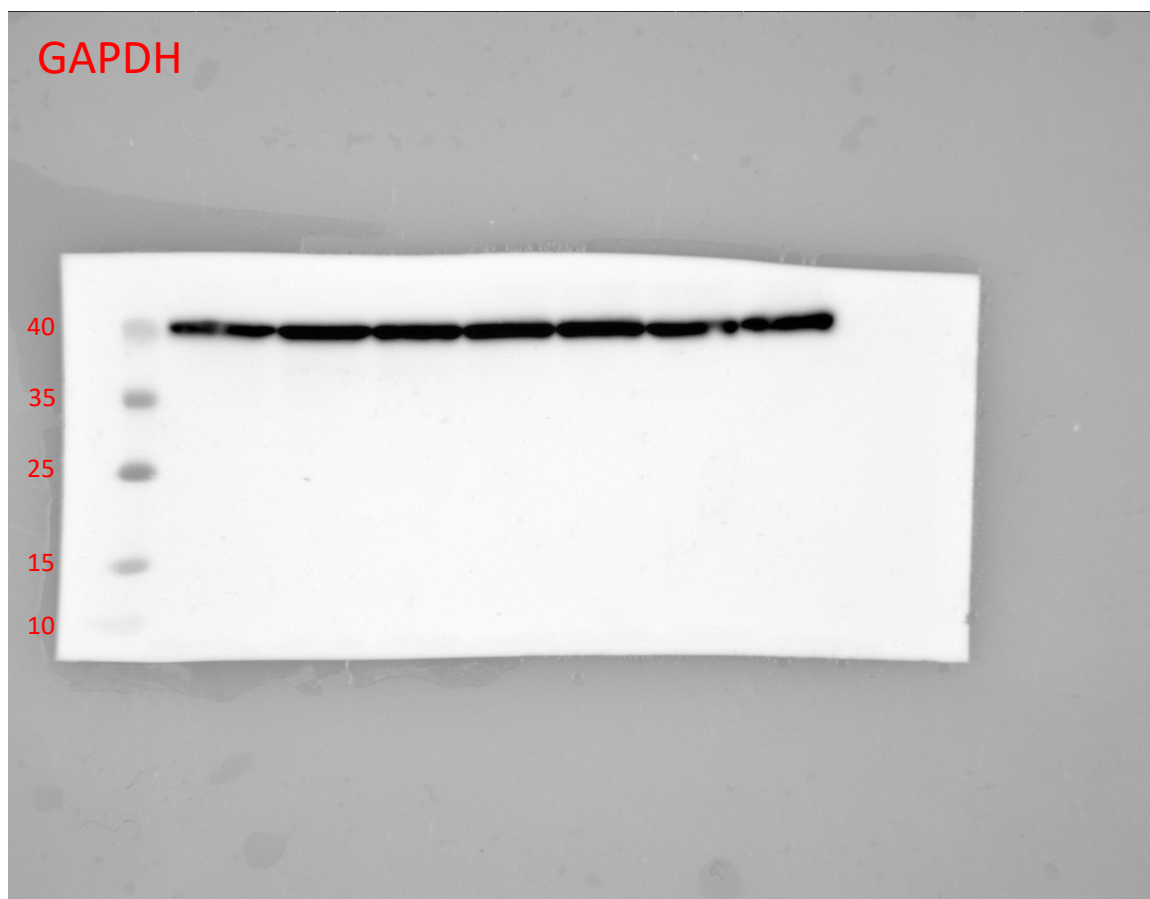

**Supplementary Figure 97:** Raw Western blot of GAPDH from Supplementary Figure 4.

**References:**

1. Chen, J.Q. *et al.* Absolute quantitation of endogenous proteins with precision and accuracy using a capillary Western system. *Anal Biochem* **442**, 97-103 (2013).
2. Delaglio, F. *et al.* Nmrpipe - a Multidimensional Spectral Processing System Based on Unix Pipes. *J Biomol Nmr* **6**, 277-293 (1995).
3. Bartels, C., Xia, T.H., Billeter, M., Guntert, P. & Wuthrich, K. The Program Xeasy for Computer-Supported Nmr Spectral-Analysis of Biological Macromolecules. *J Biomol Nmr* **6**, 1-10 (1995).
4. Bermejo, G.A., Clore, G.M. & Schwieters, C.D. Improving NMR Structures of RNA. *Structure* **24**, 806-815 (2016).
5. Schuttelkopf, A.W. & van Aalten, D.M.F. PRODRG: a tool for high-throughput crystallography of protein-ligand complexes. *Acta Crystallogr D* **60**, 1355-1363 (2004).
6. Pettersen, E.F. *et al.* UCSF chimera - A visualization system for exploratory research and analysis. *J Comput Chem* **25**, 1605-1612 (2004).
